# Supplementary material for: Structurally well-defined conjugatedmeso-aminoporphyrin oligomers analogous to polyanilines
Source: Royal Society of Chemistry journal article supplement (doi:10.1039/d2sc06387e), 2023-01-01

Electronic Supplementary Material (ESI) for

**Structurally well-defined conjugated *meso*-aminoporphyrin oligomers analogous to polyanilines**

Ken-ichi Yamashita,<sup>\*a,b,c</sup> Shouichi Takeuchi,<sup>a</sup> Ken-ichi Sugiura<sup>\*a</sup>

<sup>a</sup> Department of Chemistry, Graduate School of Science and Engineering, Tokyo Metropolitan University, 1-1 Minami-Osawa, Hachioji, Tokyo 192-0397 Japan

<sup>b</sup> Department of Chemistry, Graduate School of Science, Osaka University, 1-1 Machikaneyama, Toyonaka, Osaka, 560-0043 Japan

<sup>c</sup> Innovative Catalysis Science Division, Institute for Open and Transdisciplinary Research Initiatives (ICS-OTRI), Osaka University, Suita, Osaka 565-0871 Japan

E-mail: yamashita-k@chem.sci.osaka-u.ac.jp, sugiura@porphyrin.jp

**Contents;**

|                                                                                                               |     |
|---------------------------------------------------------------------------------------------------------------|-----|
| 1. Experimental Section.....                                                                                  | S2  |
| 2. Crystallographic data (Table S1, Fig. S1).....                                                             | S9  |
| 3. Additional spectroscopic data (Fig. S2–S14).....                                                           | S12 |
| 4. 1D <sup>1</sup> H EXSY measurements for partially reduced tetramers <b>7</b> (Fig. S15–S17, Table S2)..... | S24 |
| 5. DFT calculations (Fig. S18–S21, Tables S3–S7).....                                                         | S26 |
| 6. References.....                                                                                            | S42 |
| 7. NMR spectra of new compounds.....                                                                          | S43 |

# 1. Experimental Section

## Generals

5-Amino-10,20-bis[3,5-bis(3-methylbutoxy)phenyl]porphyrin (**1**) was synthesized as a previously reported procedure.<sup>1</sup> All other chemicals were of reagent grades and used without any further purification. CDCl<sub>3</sub>, C<sub>2</sub>D<sub>2</sub>Cl<sub>4</sub>, CD<sub>2</sub>Cl<sub>2</sub>, CD<sub>3</sub>CN, and CD<sub>3</sub>OD were acquired from Acros Organics. Analytical thin-layer chromatography (TLC) was performed on silica gel 60 F<sub>254</sub> plates. Flash column chromatography was performed using silica gel 60N (spherical, neutral, 40–50 μm). HPLC-GPC was performed by Japan Analytical Industry JAI LC-9204 equipment with JAI-GEL-2.5H columns. All NMR spectral data were recorded on a Bruker AV-500 (500 MHz) spectrometer. These data were collected at ambient temperature (25 °C) unless otherwise noted. Spectra were referenced internally to tetramethylsilane as a standard. ESI-MS data were measured on a Bruker micrOTOF II spectrometer or a Thermo Fisher Scientific Q-Exactive spectrometer. MALDI-MS data were measured on a SHIMADZU AXIMA-PERFORMANCE spectrometer. IR spectral data were recorded on a PerkinElmer Spectrum Two spectrometer equipped with an ATR unit. UV/Vis/NIR spectral data were recorded on a HITACHI U-3500 spectrometer or a Shimadzu UV-3600 spectrometer. Melting points were determined on a Yanaco MP-S3 melting point apparatus. Cyclic voltammetry (CV) measurements were carried out using ALS 650C electrochemical analyser in argon-saturated CH<sub>2</sub>Cl<sub>2</sub> or butyronitrile solutions containing 0.1 M tetrabutylammonium hexafluorophosphate as a supporting electrolyte at ambient temperature (298 K). A conventional three-electrode cell was used with a glassy carbon working electrode, a platinum wire counter electrode, and an Ag/Ag<sup>+</sup> reference electrode. Ferrocene was used as the internal standard in all electrochemical experiments and reported potentials were corrected for Fc/Fc<sup>+</sup> couple.

## General procedure for the oxidative oligomerization of **1**

A solution of **1** in toluene/AcOH was stirred at 60 °C or 100 °C in an O<sub>2</sub> atmosphere. The reaction progress was monitored using TLC. After **1** completely disappeared, the reaction mixture was diluted with toluene. And then, the solvent was removed under reduced pressure. The crude product was purified by flash column chromatography (silica gel, hexane/toluene = 1:5, then 1:10). The first, and second fractions contained **2(0)**, and **2(1)**, respectively. The latter fraction eluted by CHCl<sub>3</sub> contained the higher oligomers, which were further purified by HPLC-GPC (JAI-GEL-2.5H, CHCl<sub>3</sub>).

### Physical properties of 2(0)

$^1\text{H}$  NMR (500 MHz,  $\text{CDCl}_3$ , 323 K)  $\delta$  = 13.37 (s, 2H, Qui-NH), 9.86 (s, 1H, Por- $\text{H}_{\text{meso}}$ ), 9.11 (d-like,  $2 \times 2\text{H}$ , Por- $\text{H}_\beta$ ), 8.97 (d,  $J=4.6$  Hz, 2H, Por- $\text{H}_\beta$ ), 8.84 (d,  $J=4.7$  Hz, 2H, Por- $\text{H}_\beta$ ), 7.33 (s, 4H), 7.27 (d,  $J=4.5$  Hz, 2H, Qui- $\text{H}_\beta$ ), 6.85 (t,  $J=2.3$  Hz, 2H), 6.67 (d,  $J=4.5$  Hz, 2H, Qui- $\text{H}_\beta$ ), 6.50 (brs, 6H), 4.15 (t,  $J=6.7$  Hz, 8H,  $\text{OCH}_2$ ), 3.99 (t,  $J=5.4$  Hz, 8H,  $\text{OCH}_2$ ), 1.86 (m,  $J=6.7$  Hz, 4H, CH), 1.75 (q,  $J=6.7$  Hz, 8H,  $\text{CH}_2$ ), 1.70 (brs), 1.55 (brs, 8H), 0.97 (d,  $J=6.6$  Hz, 24H,  $\text{CH}_3$ ), 0.85 (brs, 24H,  $\text{CH}_3$ ),  $-2.08$  ppm (s, 2H, Por-NH), several signals for quinoid moiety were not observed because of significant broadening (please see the main text for details); IR (ATR):  $\tilde{\nu}$  = 3343, 2954, 2928, 2869, 1585, 1575, 1569, 1564, 1558, 1464, 1429, 1383, 1344, 1237, 1197, 1154, 1048, 991, 922, 811, 795, 731, 693, 563,  $466\text{ cm}^{-1}$ ; UV/Vis/NIR (toluene):  $\lambda_{\text{max}}$  ( $\log \epsilon$ ) = 426 (5.34), 502 (4.69), 560 (4.43), 661 (3.98), 803 nm (4.04); HRMS(ESI):  $m/z$  calcd for  $\text{C}_{104}\text{H}_{122}\text{N}_9\text{O}_9$ : 821.4733 ( $[\text{M}+2\text{H}]^{2+}$ ), found 821.4735; elemental analysis calcd (%) for  $\text{C}_{104}\text{H}_{121}\text{N}_9\text{O}_9$ : C, 76.11; H, 7.43; N, 7.68; found: C, 76.18; H, 7.45; N, 7.71.

### Physical properties of 2(1)

$^1\text{H}$  NMR (500 MHz,  $\text{CDCl}_3$ , 323 K)  $\delta$  = 13.33 (s, 2H, Qui-NH), 13.26 (s, 2H, Qui-NH), 9.85 (s, 1H, Por- $\text{H}_{\text{meso}}$ ), 9.24 (d,  $J=4.7$  Hz, 2H, Por- $\text{H}_\beta$ ), 9.12 (d,  $J=4.6$  Hz, 2H, Por- $\text{H}_\beta$ ), 9.06 (d,  $J=4.7$  Hz, 2H, Por- $\text{H}_\beta$ ), 8.99 (d,  $J=4.7$  Hz, 2H, Por- $\text{H}_\beta$ ), 8.96 (d,  $J=4.8$  Hz, 2H, Por- $\text{H}_\beta$ ), 8.89 (d,  $J=4.7$  Hz, 2H, Por- $\text{H}_\beta$ ), 8.74 (d,  $J=4.8$  Hz, 2H, Por- $\text{H}_\beta$ ), 8.71 (d,  $J=4.8$  Hz, 2H, Por- $\text{H}_\beta$ ), 7.37 (brs, 4H), 7.33–7.27 (m, 6H), 6.88 (t,  $J=2.3$  Hz, 2H), 6.83 (t,  $J=2.3$  Hz, 2H), 6.70 (d,  $J=4.5$  Hz, 2H, Qui- $\text{H}_\beta$ ), 6.51 – 6.27 (m, 12H), 4.18 (t,  $J=6.7$  Hz, 8H,  $\text{OCH}_2$ ), 4.14 (t,  $J=6.6$  Hz, 8H,  $\text{OCH}_2$ ), 3.88 (brs, 8H,  $\text{OCH}_2$ ), 3.73 (brs, 8H,  $\text{OCH}_2$ ), 1.95 – 1.81 (m, 8H), 1.82 – 1.69 (m, 19H), 1.58 (brs), 1.45 (brs), 0.98 (d,  $J=6.6$  Hz, 24H,  $\text{CH}_3$ ), 0.95 (d,  $J=6.6$  Hz, 24H,  $\text{CH}_3$ ), 0.86 (brs, 24H,  $\text{CH}_3$ ), 0.75 (d,  $J=6.6$  Hz, 24H,  $\text{CH}_3$ ),  $-1.15$  (s, 2H, Por- $\text{innerNH}$ ),  $-2.01$  ppm (s, 2H, Por- $\text{end-NH}$ ), several signals for quinoid moiety were not observed because of significant broadening (please see the main text for details); IR (ATR):  $\tilde{\nu}$  = 3334, 2954, 2927, 2869, 1586, 1558, 1464, 1432, 1383, 1345, 1237, 1157, 1112, 1059, 991, 918, 795, 731, 694, 635,  $516\text{ cm}^{-1}$ ; UV/Vis/NIR (toluene):  $\lambda_{\text{max}}$  ( $\log \epsilon$ ) = 426 (5.49), 508 (5.07), 564 (sh, 4.76), 593 (sh, 4.68), 705 (4.32), 913 nm (4.55); MS(ESI):  $m/z$  3280.0 ( $[\text{M}+\text{H}]^+$ ), 1640.5 ( $[\text{M}+2\text{H}]^{2+}$ ); elemental analysis calcd (%) for  $\text{C}_{208}\text{H}_{241}\text{N}_{19}\text{O}_{17}$ : C, 76.18; H, 7.41; N, 8.12; found: C, 75.91; H, 7.41; N, 8.01.

### Physical properties of **2(2)**

<sup>1</sup>H NMR (500 MHz, CDCl<sub>3</sub>, 323 K)  $\delta$  = 13.33 (s, 2H, Qui-NH), 13.31 (s, 2H, Qui-NH), 13.26 (s, 2H, Qui-NH), 9.85 (s, 1H, Por-H<sub>meso</sub>), 9.25 (d,  $J$ =4.7 Hz, 2H, Por-H <sub>$\beta$</sub> ), 9.13 (d,  $J$ =4.7 Hz, 2H, Por-H <sub>$\beta$</sub> ), 9.11 – 9.03 (m, 3 $\times$ 2H, Por-H <sub>$\beta$</sub> ), 8.99 (d,  $J$ =4.6 Hz, 2H, Por-H <sub>$\beta$</sub> ), 8.96 (d,  $J$ =4.7 Hz, 2H, Por-H <sub>$\beta$</sub> ), 8.90 (d,  $J$ =4.7 Hz, 2H, Por-H <sub>$\beta$</sub> ), 8.77 (d,  $J$ =4.8 Hz, 2 $\times$ 2H, Por-H <sub>$\beta$</sub> ), 8.75 (d,  $J$ =4.7 Hz, 2H, Por-H <sub>$\beta$</sub> ), 8.72 (d,  $J$ =4.7 Hz, 2H, Por-H <sub>$\beta$</sub> ), 1.01 – 0.93 (m, 72H, CH<sub>3</sub>), 0.91 – 0.82 (brs, 24H, CH<sub>3</sub>), 0.77 (m, 48H, CH<sub>3</sub>), -1.13 (s, 2H, Por<sub>inner</sub>-NH), -1.15 (s, 2H, Por<sub>inner</sub>-NH), -2.00 ppm (s, 2H, Por<sub>end</sub>-NH), several signals for quinoid moiety were not observed because of significant broadening (please see the main text for details); UV/Vis/NIR (toluene):  $\lambda_{\max}$  (log $\epsilon$ ) = 427 (5.62), 509 (5.28), 591 (4.93) 702 (4.55), 942.5 nm (4.82); MS(ESI):  $m/z$  2458.9 ([M+2H]<sup>2+</sup>), 1639.6 ([M+3H]<sup>3+</sup>), 1223.0 ([M+4H]<sup>4+</sup>).

### Physical properties of **2(3)**

<sup>1</sup>H NMR (500 MHz, CDCl<sub>3</sub>, 323 K)  $\delta$  = 13.33 (s, 2H, Qui-NH), 13.31 (s, 4H, Qui-NH), 13.26 (s, 2H, Qui-NH), 9.85 (s, 1H, Por-H<sub>meso</sub>), 9.25 (d,  $J$ =4.7 Hz, 2H, Por-H <sub>$\beta$</sub> ), 9.12 (d,  $J$ =4.7 Hz, 2H, Por-H <sub>$\beta$</sub> ), 9.11 – 9.04 (m, 5 $\times$ 2H, Por-H <sub>$\beta$</sub> ), 8.99 (d,  $J$ =4.6 Hz, 2H, Por-H <sub>$\beta$</sub> ), 8.96 (d,  $J$ =4.8 Hz, 2H, Por-H <sub>$\beta$</sub> ), 8.90 (d,  $J$ =4.7 Hz, 2H, Por-H <sub>$\beta$</sub> ), 8.77 (d,  $J$ =4.7 Hz, 4 $\times$ 2H, Por-H <sub>$\beta$</sub> ), 8.75 (d,  $J$ =4.6 Hz, 2H, Por-H <sub>$\beta$</sub> ), 8.72 (d,  $J$ =4.7 Hz, 2H, Por-H <sub>$\beta$</sub> ), -1.14 (m, 6H, Por<sub>inner</sub>-NH), -2.00 ppm (s, 2H, Por<sub>end</sub>-NH), several signals for quinoid moiety were not observed because of significant broadening (please see the main text for details); UV/Vis/NIR (toluene):  $\lambda_{\max}$  (log $\epsilon$ ) = 427.5 (5.71), 510 (5.39), 592 (5.06) 703 (4.68), 952 nm (4.96); MS(ESI):  $m/z$  3277.9 ([M+2H]<sup>2+</sup>), 2185.6 ([M+3H]<sup>3+</sup>), 1639.5 ([M+4H]<sup>4+</sup>), 1311.8 ([M+5H]<sup>5+</sup>).

### Preparation of Ni-**2(0)**

A mixture of **2(0)** (32.76 mg, 0.020 mmol) and Ni(acac)<sub>2</sub> (51.32 mg, 0.20 mmol) in toluene (5 mL) was refluxed for 17 h. The reaction mixture was directly poured on top of a silica gel column packed with toluene, and then eluted with toluene. The solvent was removed under reduced pressure to give **2(0)** as a dark brown powder (34.89 mg, 0.020 mmol, quant). An analytically pure product was obtained by the recrystallization from hot toluene–hexane. <sup>1</sup>H NMR (500 MHz, CDCl<sub>3</sub>, 0°C)  $\delta$  = 9.61 (s, 1H, Por-H<sub>meso</sub>), 9.31 (d,  $J$ =4.9 Hz, 2H, Por-H <sub>$\beta$</sub> ), 9.00 (d,  $J$ =4.7 Hz, 2H, Por-H <sub>$\beta$</sub> ), 8.92 (d,  $J$ =4.9 Hz, 2H, Por-H <sub>$\beta$</sub> ), 8.86 (d,  $J$ =4.7 Hz, 2H, Por-H <sub>$\beta$</sub> ), 7.72 – 7.64 (m, 3H, ArH and Qui-H <sub>$\beta$</sub> ), 7.04 (d,  $J$ =4.6 Hz, 1H, Qui-H <sub>$\beta$</sub> ), 6.99 (d,

$J=4.4$  Hz, 1H, Qui- $H_\beta$ ), 6.87 (d,  $J=4.4$  Hz, 1H, Qui- $H_\beta$ ), 6.80 (t,  $J=2.2$  Hz, 2H, ArH), 6.66 (d,  $J=2.1$  Hz, 2H, ArH), 6.62 (t,  $J=2.2$  Hz, 1H, ArH), 6.60 (d,  $J=4.4$  Hz, 1H, Qui- $H_\beta$ ), 6.58 (brs, 2H, ArH) 6.41 (d,  $J=4.4$  Hz, 1H, Qui- $H_\beta$ ), 6.25 (t,  $J=2.3$  Hz, 1H, ArH), 6.13 (brs, 2H, ArH), 5.49 (d,  $J=4.9$  Hz, 1H, Qui- $H_\beta$ ), 4.21 (t,  $J=7.2$  Hz, 4H, OCH<sub>2</sub>), 4.03 (t,  $J=6.8$  Hz, 4H, OCH<sub>2</sub>), 3.95 (t,  $J=6.8$  Hz, 4H, OCH<sub>2</sub>), 3.72 – 3.64 (m, 5H, Qui- $H_\beta$  and OCH<sub>2</sub>), 1.96 – 1.71 (m, 14H), 1.68 – 1.54 (m), 1.44 (q,  $J=6.8$  Hz, 4H), 1.02 (d,  $J=6.6$  Hz, 12H), 1.00 (d,  $J=6.7$  Hz, 12H), 0.89 (d,  $J=6.6$  Hz, 12H), 0.77 ppm (d,  $J=6.6$  Hz, 12H); IR (ATR):  $\tilde{\nu}$  = 2953, 2927, 2869, 1587, 1539, 1464, 1432, 1383, 1343, 1322, 1276, 1224, 1157, 1054, 1021, 835, 791, 725, 757, 696, 653, 560, 446, 418  $\text{cm}^{-1}$ ; UV/Vis/NIR (toluene):  $\lambda_{\text{max}}$  ( $\log \epsilon$ ) = 420 (5.08), 475 (4.77), 539 (4.49) 564 (sh, 4.60), 585 (4.66), 784 (sh, 4.14) 886 nm (4.27); HRMS(ESI):  $m/z$  calcd for C<sub>104</sub>H<sub>118</sub>N<sub>9</sub>O<sub>9</sub>Ni<sub>2</sub>: 1754.7728 ([M+H]<sup>+</sup>); found 1754.7728, calcd for C<sub>104</sub>H<sub>117</sub>N<sub>9</sub>O<sub>9</sub>Ni<sub>2</sub>Na: 1776.7538 ([M+Na]<sup>+</sup>); found 1776.7555; elemental analysis calcd (%) for C<sub>104</sub>H<sub>117</sub>N<sub>9</sub>O<sub>9</sub>Ni<sub>2</sub>: C, 71.20; H, 6.72; N, 7.19; found: C, 71.14; H, 6.68; N, 7.09.

### Preparation of 5,15-dioxo-10,20-bis(3,5-bis(3-methylbutoxy)phenyl)porphodimethene 3

This compound was synthesized by the modified procedure reported by us.<sup>2</sup> A mixture of 5,15-bis(3,5-bis(3-methylbutoxy)phenyl)porphyrin (80.7 mg, 0.10 mmol) and PhI(OAc)<sub>2</sub> (112.7 mg, 0.35 mmol) in acetic acid (10 mL) was stirred at 100 °C for 0.5 h. The resultant solution was concentrated under reduced pressure. The crude product was purified by flash column chromatography (silica gel, hexane : toluene = 1:3) to give **3** as a brown solid (72.3 mg, 0.0086 mmol 86%). An analytically pure sample was obtained by recrystallization from EtOAc/MeOH as dark brown crystals (57.1 mg 0.068 mmol, 68%). <sup>1</sup>H NMR (500 MHz, CDCl<sub>3</sub>, 50 °C)  $\delta$  = 13.96 (s, 2H, Qui-NH), 7.16 (d,  $J$  = 4.5 Hz, 4H, Qui- $H_\beta$ ), 6.62 (brs, 4H, Qui- $H_\beta$ ), 6.58 (d,  $J$  = 2.2 Hz, 2H), 6.56 (d,  $J$  = 2.2 Hz, 4H), 4.00 (t,  $J$  = 6.7 Hz, 8H), 1.83 (m,  $J$  = 6.7 Hz, 4H), 1.69 (q,  $J$  = 6.7 Hz, 8H), 0.97 (d,  $J$  = 6.6 Hz, 24H); UV/Vis/NIR (toluene):  $\lambda_{\text{max}}$  ( $\log \epsilon$ ) = 402 (sh, 4.62), 414 (4.65), 475 (4.26), 504 nm (4.36); HRMS(ESI):  $m/z$  calcd for C<sub>52</sub>H<sub>61</sub>N<sub>4</sub>O<sub>6</sub>: 837.4586 ([M+H]<sup>+</sup>); found 837.4567; elemental analysis calcd (%) for C<sub>52</sub>H<sub>60</sub>N<sub>4</sub>O<sub>6</sub>: C, 74.61; H, 7.22; N, 6.69; found: C, 74.59; H, 7.24; N, 6.71.

### Preparation of 4b

A mixture of **2(0)** (65.62 mg, 0.040 mmol), sodium ascorbate (79.24 mg, 0.40 mmol), K<sub>2</sub>CO<sub>3</sub> (82.94 mg,

0.60 mmol) and 1-iodobutane (88  $\mu$ L, 0.80 mmol, 20 equiv) in DMF (1 mL) was stirred at 60 °C under N<sub>2</sub> for 2.5 h. The reaction mixture was diluted with CHCl<sub>3</sub>, washed with water (5  $\times$  4 mL), dried over MgSO<sub>4</sub>, and concentrated under reduced pressure. The crude product was purified by flash column chromatography (silica gel, hexane/EtOAc 15:1) to give **4b** as a purple solid (53.58 mg, 0.031 mmol 79%). An analytically pure sample was obtained by recrystallization from toluene/MeOH as purple crystals (49.10 mg 0.029 mmol, 73%). M.p. 248–250 °C; <sup>1</sup>H NMR (500 MHz, CDCl<sub>3</sub>, 0°C)  $\delta$  = 10.71 (s, 1H, NH), 9.75 (s, 1H, Por-H<sub>meso</sub>), 9.35 (d,  $J$  = 4.7 Hz, 2H, Por-H $\beta$ ) 9.19 (d,  $J$  = 4.5 Hz, Por-H $\beta$ ), 9.12 (d,  $J$  = 4.7 Hz, 2H, Por-H $\beta$ ), 9.06 (d,  $J$  = 4.7 Hz, 2H, Por-H $\beta$ ), 8.91 (d,  $J$  = 4.7 Hz, 2H, Por-H $\beta$ ), 8.86 (d,  $J$  = 4.7 Hz, 2H, Por-H $\beta$ ), 8.52 (d,  $J$  = 4.7 Hz, 2H, Por-H $\beta$ ), 8.47 (d,  $J$  = 4.7 Hz, 2H, Por-H $\beta$ ), 7.23 (m, 8H, Ar-H), 6.74 (m, 4H, Ar-H), 4.99 (t,  $J$  = 6.6 Hz, 2H, OCH<sub>2</sub>), 4.03 (m, 16H, OCH<sub>2</sub>), 2.36 (m, 2H, CH<sub>2</sub>), 1.95 (m, 2H, CH), 1.78 (m, 8H, CH), 1.66 (m, 16H, CH<sub>2</sub>), 1.21 (t,  $J$  = 7.4 Hz, 3H, CH<sub>3</sub>), 0.89 (d,  $J$  = 6.5 Hz, 48H, CH<sub>3</sub>), -1.68 (s, 2H, Por-NH), -1.82 (s, 2H, Por-NH); <sup>13</sup>C NMR (125 MHz, CDCl<sub>3</sub>)  $\delta$  = 158.38 (Cq), 158.36 (Cq), 143.32 (Cq), 143.28 (Cq), 137.3 (Cq), 130.5, 127.3, 119.9 (Cq), 119.6 (Cq), 114.20 (CH), 114.17 (CH), 102.3 (CH), 100.8 (CH), 84.2 (CH<sub>2</sub>), 66.6 (CH<sub>2</sub>), 38.0 (CH<sub>2</sub>), 33.2 (CH<sub>2</sub>), 25.0 (CH), 22.6 (CH<sub>3</sub>), 19.8 (CH<sub>2</sub>), 14.2 (CH<sub>3</sub>) (Several signals were overlapped. Moreover, signals corresponding to the pyrrole  $\alpha$  and  $\beta$  carbons were not observed due to severe exchange broadening through NH tautomerism); IR (ATR):  $\tilde{\nu}$  = 3312, 2955, 2929, 2869, 1587, 1464, 1432, 1384, 1339, 1294, 1274, 1245, 1156, 1061, 996, 983, 833, 797, 732, 696, 638, 464 cm<sup>-1</sup>; UV/Vis/NIR (toluene):  $\lambda_{\max}$  (log $\epsilon$ ) = 418 (5.36), 471 (sh, 4.95), 586 (4.33) 606 (4.30), 702 nm (4.45); HRMS(ESI):  $m/z$  calcd for C<sub>108</sub>H<sub>132</sub>N<sub>9</sub>O<sub>9</sub>: 1700.0175 ([M+H]<sup>+</sup>); found 1700.0168; elemental analysis calcd (%) for C<sub>108</sub>H<sub>131</sub>N<sub>9</sub>O<sub>9</sub>: C, 76.34; H, 7.77; N, 7.42; found: C, 76.19; H, 7.69; N, 7.47.

### Reduction of **2(1)**

A mixture of **2(1)** (16.45 mg, 0.0050 mmol), sodium ascorbate (9.93 mg, 0.050 mmol) in DMF (1 mL) was stirred at 40 °C under N<sub>2</sub> for 1 h. The reaction mixture was diluted with CHCl<sub>3</sub>, washed with water (3  $\times$  4 mL), dried over MgSO<sub>4</sub>, and concentrated under reduced pressure. The NMR spectrum of the resultant product indicated the almost quantitative formation of partially oxidized tetramer **6**, which would be formed by the aerobic oxidation of **5a**. As described in the main text, **6** was gradually oxidized to **2(1)** in the solution.

## Physical properties of **6**

<sup>1</sup>H NMR (500 MHz, CDCl<sub>3</sub>)  $\delta$  = 13.17 (s, 2H, Qui-NH), 10.60 (s, 1H, NH), 10.35 (s, 1H, NH), 9.78 (s, 1H, Por-H<sub>meso</sub>), 9.26 (d,  $J$  = 4.8 Hz, 2H, Por-H <sub>$\beta$</sub> ), 9.15 – 9.07 (m, 4H, Por-H <sub>$\beta$</sub> ), 9.06 – 8.99 (brs, 4H, Por-H <sub>$\beta$</sub> ), 8.96 – 8.89 (m, 4H, Por-H <sub>$\beta$</sub> ), 8.66 (d,  $J$  = 4.8 Hz, 2H, Por-H <sub>$\beta$</sub> ), 8.57 (d,  $J$  = 4.8 Hz, 2H, Por-H <sub>$\beta$</sub> ), 8.49 – 8.32 (m, 6H, Por-H <sub>$\beta$</sub> ), –0.71 (s, 2H, Por-NH), –0.83 (s, 2H, Por-NH), –1.68 ppm (s, 2H, Por-NH), several signals for quinoid moiety were not observed because of significant broadening (please see the main text for details).

## Acetylation reaction of the reduced products of **2(1)**

A mixture of **2(1)** (16.40 mg, 0.0050 mmol), sodium ascorbate (9.89 mg, 0.050 mmol) in DMF (1 mL) was stirred at 40 °C under N<sub>2</sub> for 1 h. The reaction mixture was diluted with CHCl<sub>3</sub>, washed with water (3 × 4 mL), dried over MgSO<sub>4</sub>, and concentrated under reduced pressure. The resultant product containing **5a** and **6** was added CHCl<sub>3</sub> (1 mL), *N,N*-dimethylaminopyridine (2.50 mg, 0.020 mmol, 4 equiv), and acetic anhydride (25  $\mu$ L, 0.26 mmol, 52 equiv). The resultant solution was stirred at room temperature for 1 h. The reaction mixture was diluted with CHCl<sub>3</sub>, washed with water (3 × 4 mL) and aq. NaHCO<sub>3</sub> (1 × 4 mL), dried over MgSO<sub>4</sub>, and concentrated under reduced pressure. The crude product was purified by flash column chromatography (silica gel, hexane/CH<sub>2</sub>Cl<sub>2</sub> 1:5). The desired product **5b** was obtained as a purple solid from the third fractions (5.05 mg, 0.0015 mmol, 30%). The second fractions contained the mixture of **7a** and **7b**, which would be formed by the aerobic oxidation of **5b** during the workup process (8.85 mg, 0.0027 mmol 53%).

## Physical properties of **5b**

<sup>1</sup>H NMR (500 MHz, CDCl<sub>3</sub>)  $\delta$  = 10.57 (s, 1H, NH), 10.48 (s, 1H, NH), 10.35 (s, 1H, NH), 9.76 (s, 1H, Por-H<sub>meso</sub>), 9.24 (d,  $J$  = 4.9 Hz, 2H, Por-H <sub>$\beta$</sub> ), 9.15 (brs, 2H, Por-H <sub>$\beta$</sub> ), 9.13 – 9.07 (m, 6H, Por-H <sub>$\beta$</sub> ), 9.05 (brs, 4H, Por-H <sub>$\beta$</sub> ), 9.00 (d,  $J$  = 4.8 Hz, 2H, Por-H <sub>$\beta$</sub> ), 8.93 (d,  $J$  = 4.7 Hz, 2H, Por-H <sub>$\beta$</sub> ), 8.84 (d,  $J$  = 4.9 Hz, 2H, Por-H <sub>$\beta$</sub> ), 8.55 (d,  $J$  = 4.8 Hz, 2H, Por-H <sub>$\beta$</sub> ), 8.49 (d,  $J$  = 4.8 Hz, 2H, Por-H <sub>$\beta$</sub> ), 8.47 – 8.37 (m, 8H, Por-H <sub>$\beta$</sub> ), 7.27 (d,  $J$  = 2.3 Hz, 4H, Ar-H), 7.23 (d,  $J$  = 2.2 Hz, 4H, Ar-H), 7.13 (d-like, 8H, Ar-H), 6.79 – 6.74 (m, 4H, Ar-H), 6.64 – 6.59 (m, 4H, Ar-H), 4.10 – 4.02 (m, 16H, OCH<sub>2</sub>), 3.97 – 3.90 (m, 16H, OCH<sub>2</sub>), 2.95 (s, 3H, CH<sub>3</sub>CO-), 1.85 – 1.76 (m, 8H), 1.74 – 1.64 (m, 24H), 1.60 – 1.54 (m, 16H), 0.91 (d,  $J$  = 6.6 Hz, 48H),

CH<sub>3</sub>), 0.83 – 0.78 (m, 48H, CH<sub>3</sub>), –0.79 (s, 4H, Por-NH), –1.50 (s, 2H, Por-NH), –1.63 ppm (s, 2H, Por-NH); UV/Vis/NIR (toluene):  $\lambda_{\max}$  ( $\log \epsilon$ ) = 421 (5.48), 484 (sh, 5.17), 588 (4.49) 633 (sh, 4.50), 758.5 nm (4.75).

### Physical properties of the mixture of 7a and 7b

<sup>1</sup>H NMR (500 MHz, CDCl<sub>3</sub>)  $\delta$  = 13.35 (s, 4H, 2×Qui-NH), 10.61 (s, 1H, NH), 10.52 (s, 1H, NH), 9.89 (s, 1H, Por-H<sub>meso</sub>), 9.78 (s, 1H, Por-H<sub>meso</sub>), 9.27 (d,  $J$  = 4.7 Hz, Por-H <sub>$\beta$</sub> ), 9.21 (d,  $J$  = 4.7 Hz, Por-H <sub>$\beta$</sub> ), 9.15 (d,  $J$  = 4.7 Hz, Por-H <sub>$\beta$</sub> ), 9.13 – 9.04 (m, Por-H <sub>$\beta$</sub> ), 9.01 (d,  $J$  = 4.7 Hz, Por-H <sub>$\beta$</sub> ), 8.97 – 8.89 (m, Por-H <sub>$\beta$</sub> ), 8.89 – 8.82 (m, Por-H <sub>$\beta$</sub> ), 8.79 – 8.72 (m, Por-H <sub>$\beta$</sub> ) 2.97 (s, 3H, CH<sub>3</sub>CO-), 2.96 (s, 3H, CH<sub>3</sub>CO-), –1.03 (s, 2H, Por-NH), –1.07 (s, 2H, Por-NH), –1.54 (s, 2H, Por-NH), –1.67 (s, 2H, Por-NH), –1.96 (s, 2H, Por-NH), –2.08 (s, 2H, Por-NH), several signals for quinoid moiety were not observed because of significant broadening (please see the main text for details); UV/Vis/NIR (toluene):  $\lambda_{\max}$  ( $\log \epsilon$ ) = 425 (5.58), 496 (sh, 5.06), 564 (4.69) 604 (sh, 4.58), 718 (4.53), 842 nm (4.45); HRMS(ESI):  $m/z$  calcd for C<sub>210</sub>H<sub>247</sub>N<sub>19</sub>O<sub>18</sub>: 1662.4526 ([M+2H]<sup>2+</sup>); found 1662.4515.



## 2. Crystallographic data

Single crystals of **Ni-2(0)** suitable for X-ray diffraction study were obtained by slow diffusion of MeOH vapour into a solution of **Ni-2(0)** in butyronitrile. Single-crystal X-ray diffraction data were collected on Rigaku VariMax with Saturn 724+ diffractometer using multilayer mirror monochromated Mo-K $\alpha$  radiation ( $\lambda = 0.71075 \text{ \AA}$ ) by the  $\omega$  scan mode. The crystal was cooled by a stream of cold N<sub>2</sub> gas. Collection, indexing, peak integration, cell refinement, and scaling of the diffraction data were performed using the CrystalClear-SM Expert 2.0 r4 software (Rigaku, 2009). The data were corrected for Lorentz and polarization effects, and empirical absorption correction was applied. The structures were solved by the SHELXS<sup>3</sup> program and refined by full-matrix least-squares calculations on  $F^2$  (SHELXL2018)<sup>4</sup>. All nonhydrogen atoms were modelled anisotropically. All hydrogen atoms were placed in idealized positions and refined using a riding model [ $U_{\text{iso}}(\text{H}) = 1.2U_{\text{eq}}(\text{C})$ ]. The crystallographic data are summarized in Tables S1 and S2. CCDC 2092977 contains the supplementary crystallographic data for this paper. These data can be obtained free of charge via [www.ccdc.cam.ac.uk/data\\_request/cif](http://www.ccdc.cam.ac.uk/data_request/cif).

**Table S1** Crystallographic data for Ni-2(0)·(MeOH).

|                                   |                                                                                                                                                                       |
|-----------------------------------|-----------------------------------------------------------------------------------------------------------------------------------------------------------------------|
| Identification code               | Ni-2(0)                                                                                                                                                               |
| Empirical formula                 | C105 H121 N9 Ni2 O10                                                                                                                                                  |
| Formula weight                    | 1786.52                                                                                                                                                               |
| Temperature                       | 93(2) K                                                                                                                                                               |
| Wavelength                        | 0.71073 Å                                                                                                                                                             |
| Crystal system                    | Monoclinic                                                                                                                                                            |
| Space group                       | <i>P</i> 2 <sub>1</sub> / <i>c</i>                                                                                                                                    |
| Unit cell dimensions              | $a = 21.230(13) \text{ \AA}$ $\alpha = 90^\circ$ .<br>$b = 28.360(16) \text{ \AA}$ $\beta = 105.110(7)^\circ$ .<br>$c = 16.320(10) \text{ \AA}$ $\gamma = 90^\circ$ . |
| Volume                            | 9486(10) Å <sup>3</sup>                                                                                                                                               |
| Z                                 | 4                                                                                                                                                                     |
| Density (calculated)              | 1.251 Mg/m <sup>3</sup>                                                                                                                                               |
| Absorption coefficient            | 0.461 mm <sup>-1</sup>                                                                                                                                                |
| F(000)                            | 3800                                                                                                                                                                  |
| Crystal size                      | 0.110 x 0.090 x 0.080 mm <sup>3</sup>                                                                                                                                 |
| Theta range for data collection   | 3.002 to 25.346°.                                                                                                                                                     |
| Index ranges                      | -25<=h<=25, -32<=k<=34, -19<=l<=14                                                                                                                                    |
| Reflections collected             | 51756                                                                                                                                                                 |
| Independent reflections           | 17188 [R(int) = 0.1421]                                                                                                                                               |
| Completeness to theta = 25.242°   | 99.6 %                                                                                                                                                                |
| Refinement method                 | Full-matrix least-squares on F <sup>2</sup>                                                                                                                           |
| Data / restraints / parameters    | 17188 / 173 / 1258                                                                                                                                                    |
| Goodness-of-fit on F <sup>2</sup> | 1.064                                                                                                                                                                 |
| Final R indices [I>2sigma(I)]     | R1 = 0.1137, wR2 = 0.2902                                                                                                                                             |
| R indices (all data)              | R1 = 0.1819, wR2 = 0.3520                                                                                                                                             |
| Extinction coefficient            | n/a                                                                                                                                                                   |
| Largest diff. peak and hole       | 1.050 and -0.739 e.Å <sup>-3</sup>                                                                                                                                    |

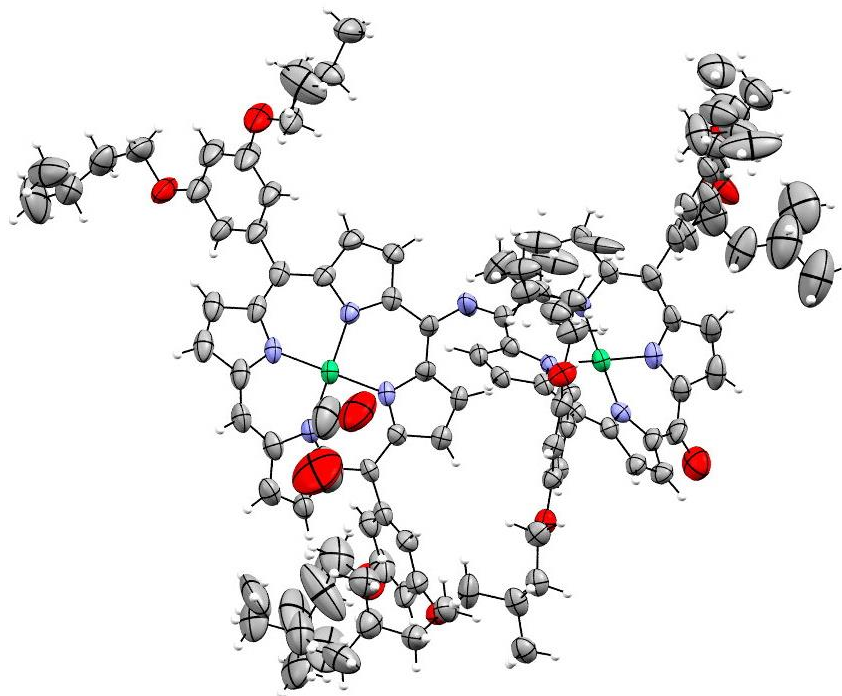

**Fig. S1** ORTEP view (40% probability level) of the asymmetric unit of Ni-2(0)·(MeOH) (C = grey, H = white, N = blue, O = red, and Ni = green).

### 3. Additional spectroscopic data

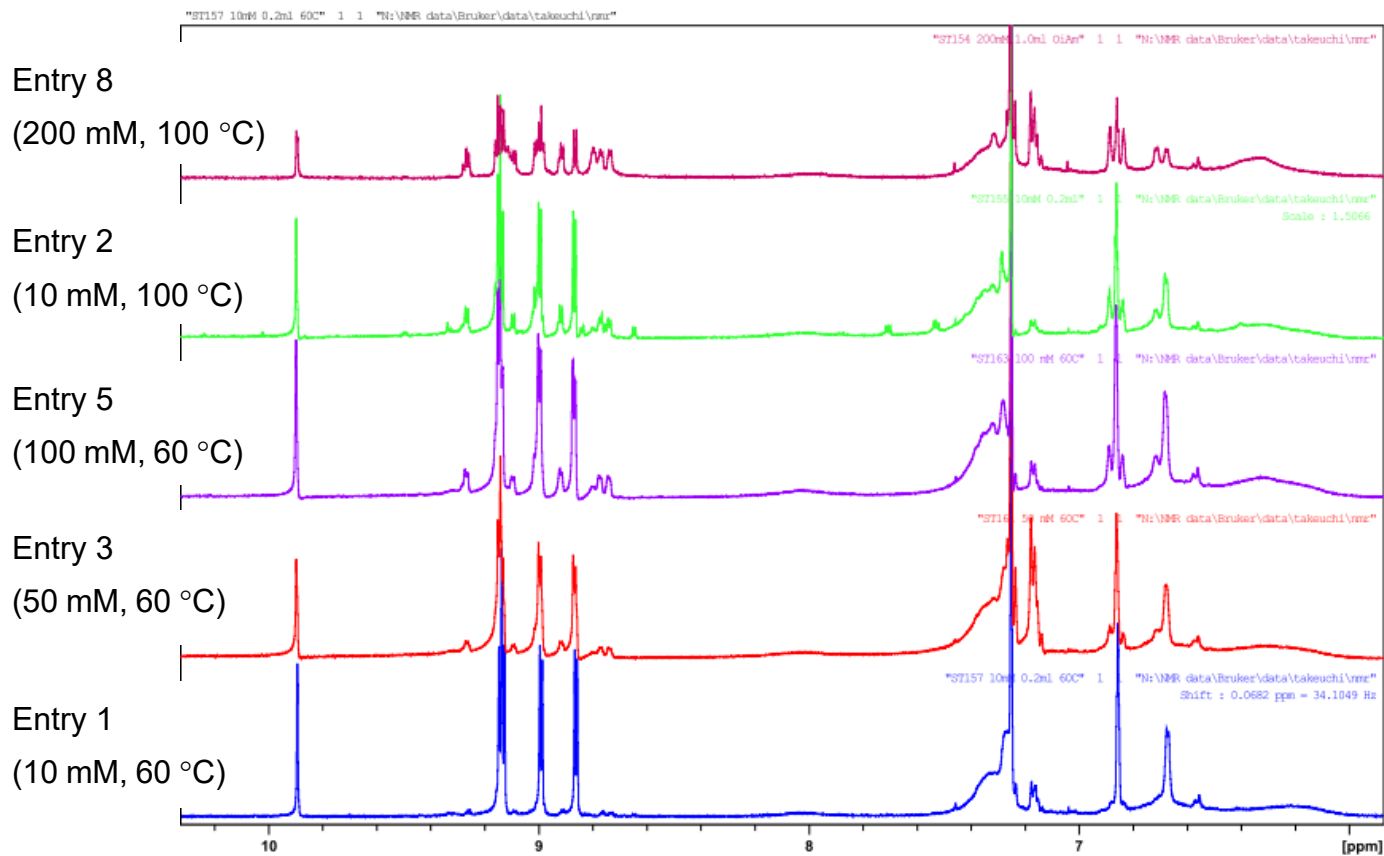

**Fig. S2**  $^1\text{H}$  NMR spectra (500 MHz,  $\text{CDCl}_3$ , r.t.) of the crude mixture of **2(n)**.

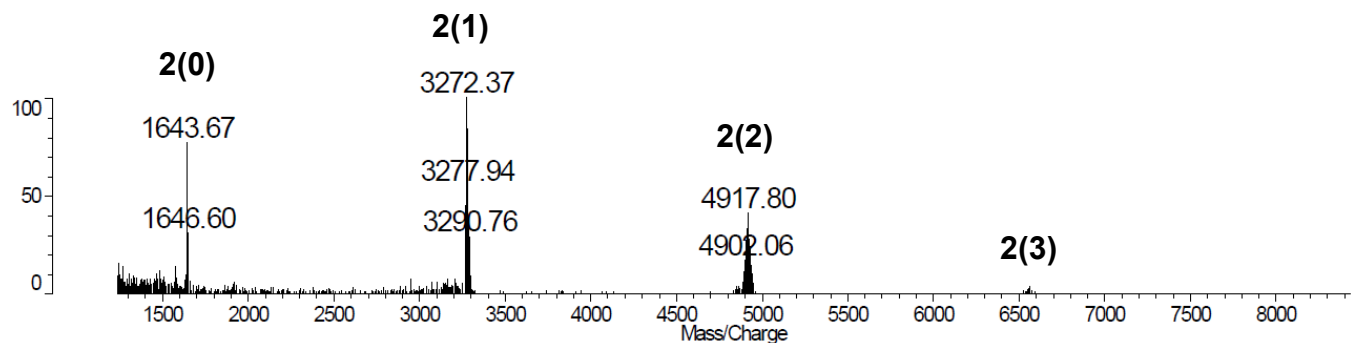

**Fig. S3** MALDI-TOF MS spectrum (matrix: dithranol) of the crude product for the oligomerization of **1** (entry 8 in Table 1).

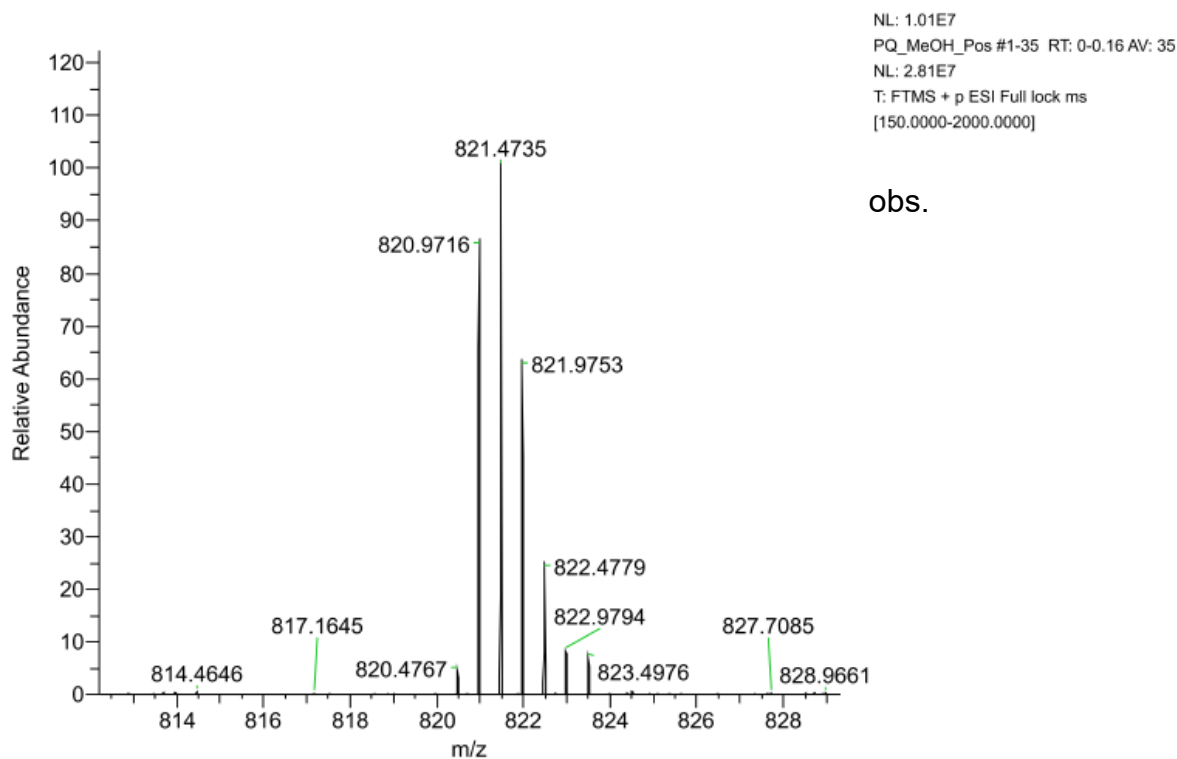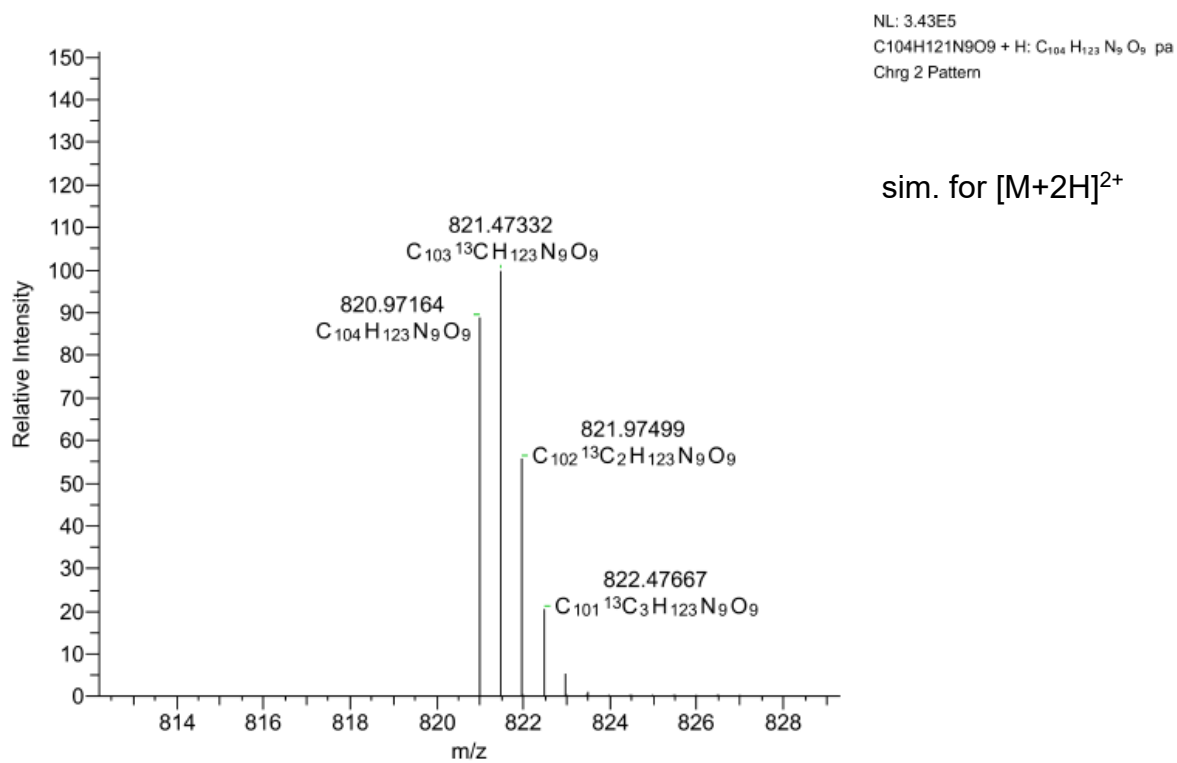

Fig. S4 HR-ESI MS spectrum of 2(0).

# Generic Display Report

## Analysis Info

Analysis Name D:\Data\inorg1\takeuchi\111108\4mer-1.d  
Method esi\_pos\_high.m  
Sample Name 4mer CH<sub>2</sub>Cl<sub>2</sub>-acetonitrile HCOOH  
Comment 200C 400/800

Acquisition Date 11/8/2011 5:57:48 PM

Operator BDAL@DE  
Instrument micrOTOF

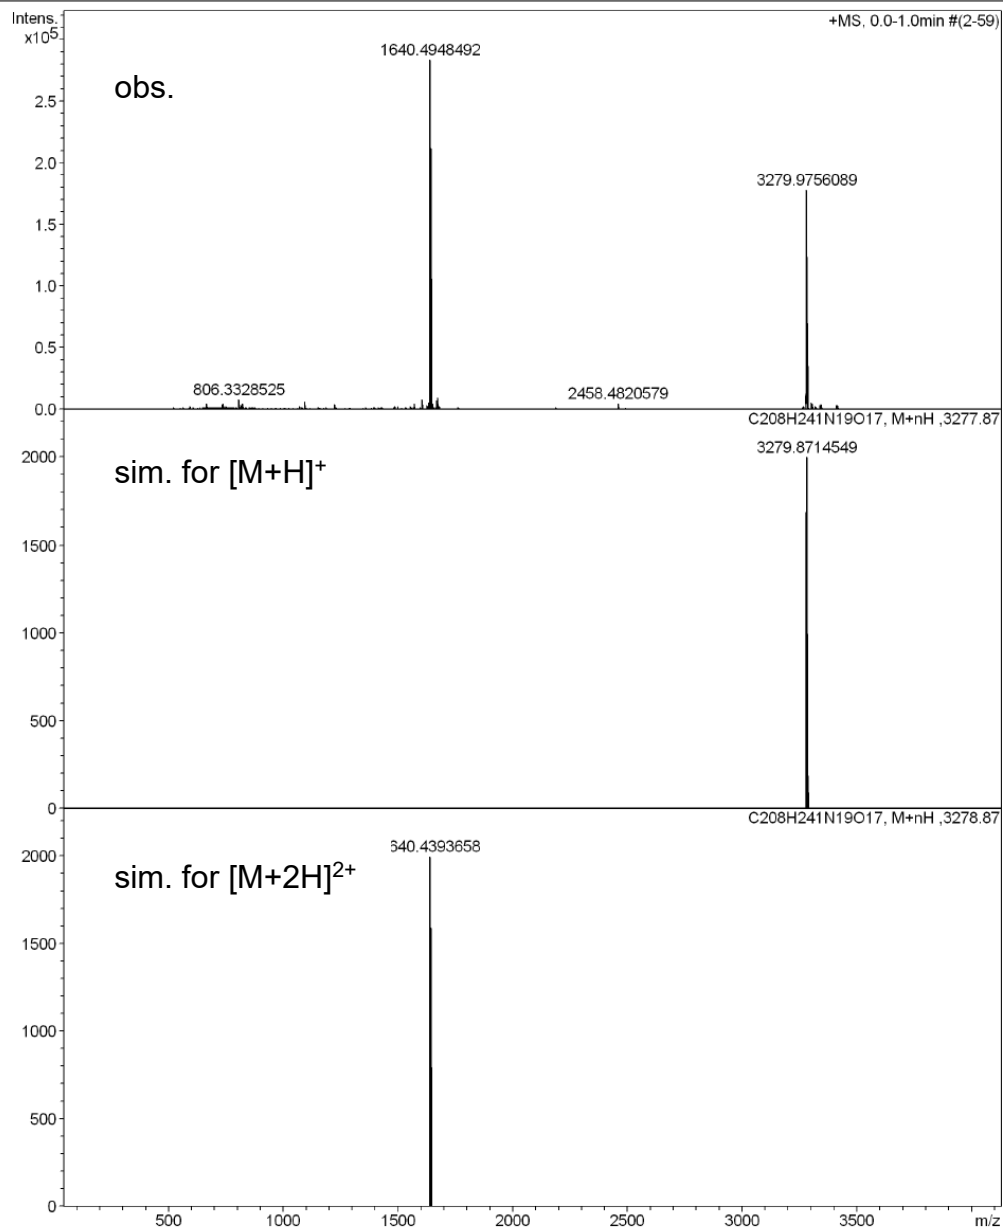

**Fig. S5** ESI MS spectrum of **2(1)**.

# Generic Display Report

## Analysis Info

Analysis Name D:\Data\inorg1\takeuchi\111108\6mer-1.d  
Method esi\_pos\_high.m  
Sample Name 6mer CH<sub>2</sub>Cl<sub>2</sub>-acetonitrile HCOOH  
Comment 200C 400/800

Acquisition Date 11/8/2011 6:57:17 PM

Operator BDAL@DE  
Instrument micrOTOF

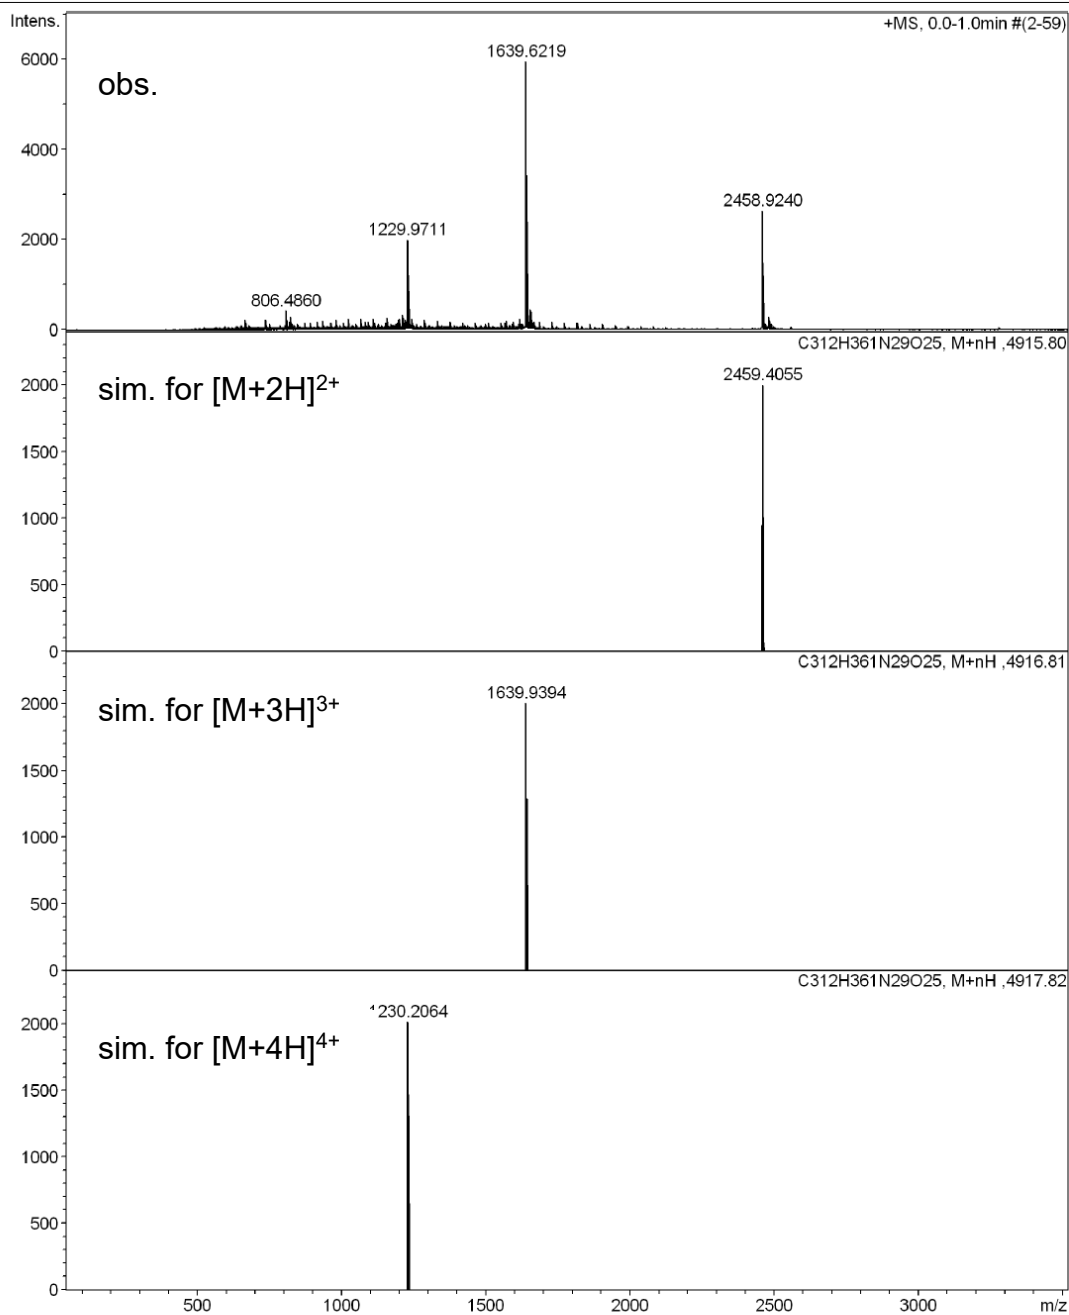

Fig. S6 ESI MS spectrum of 2(2).

# Generic Display Report

## Analysis Info

Analysis Name D:\Data\inorg1\takeuchi\111108\8mer-3.d  
Method esi\_pos\_high.m  
Sample Name 8mer CH<sub>2</sub>Cl<sub>2</sub>-acetonitrile HCOOH  
Comment 200C 300/800

Acquisition Date 11/8/2011 6:43:07 PM

Operator BDAL@DE  
Instrument micrOTOF

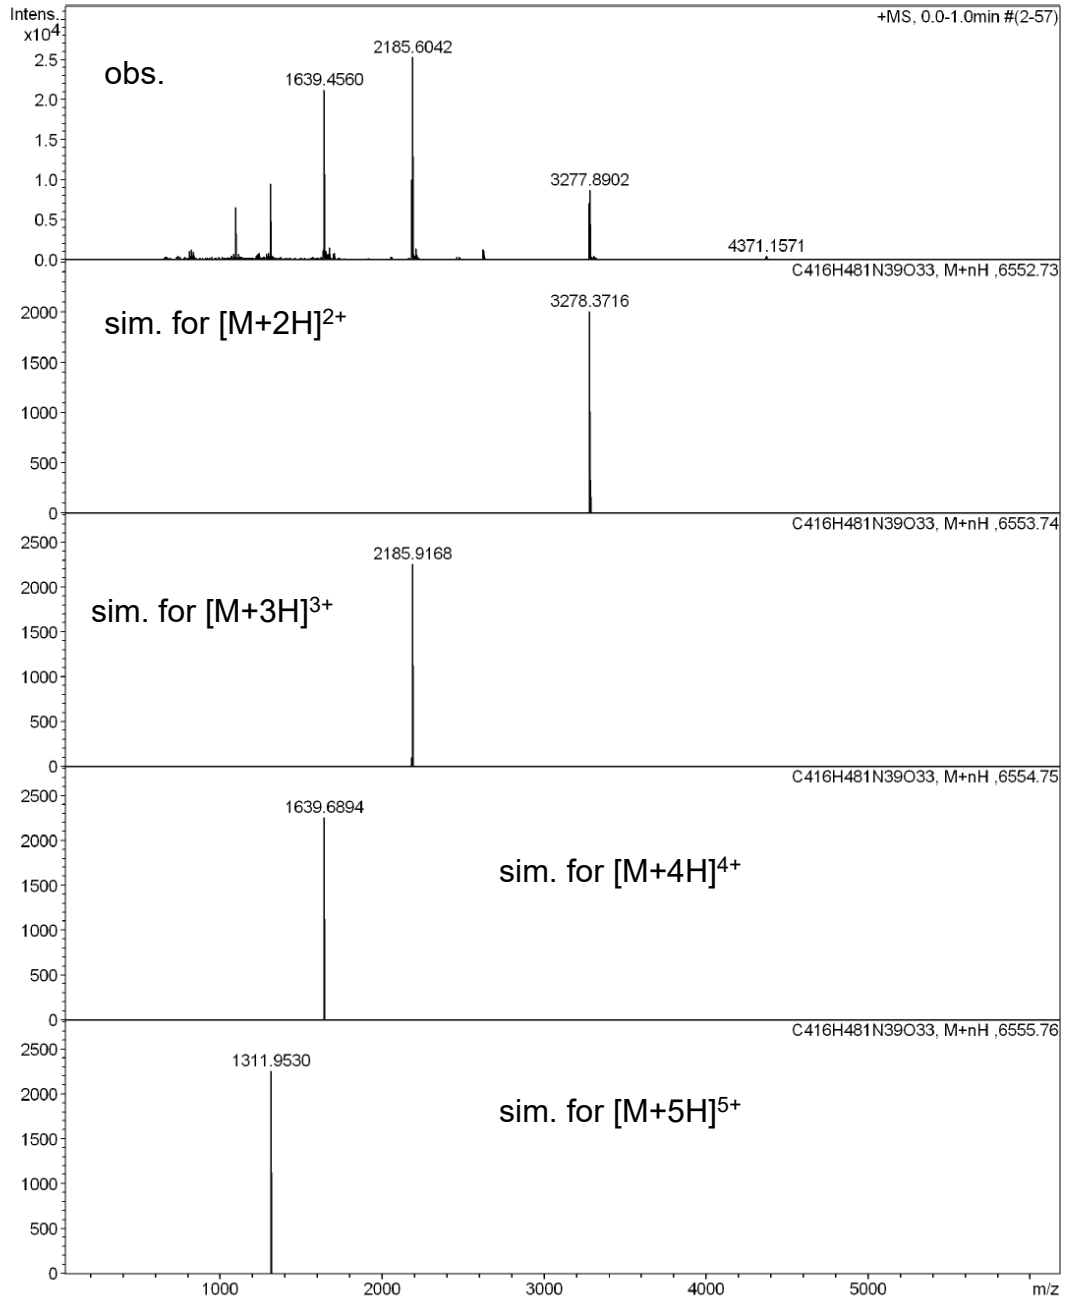

Fig. S7 ESI MS spectrum of 2(3).



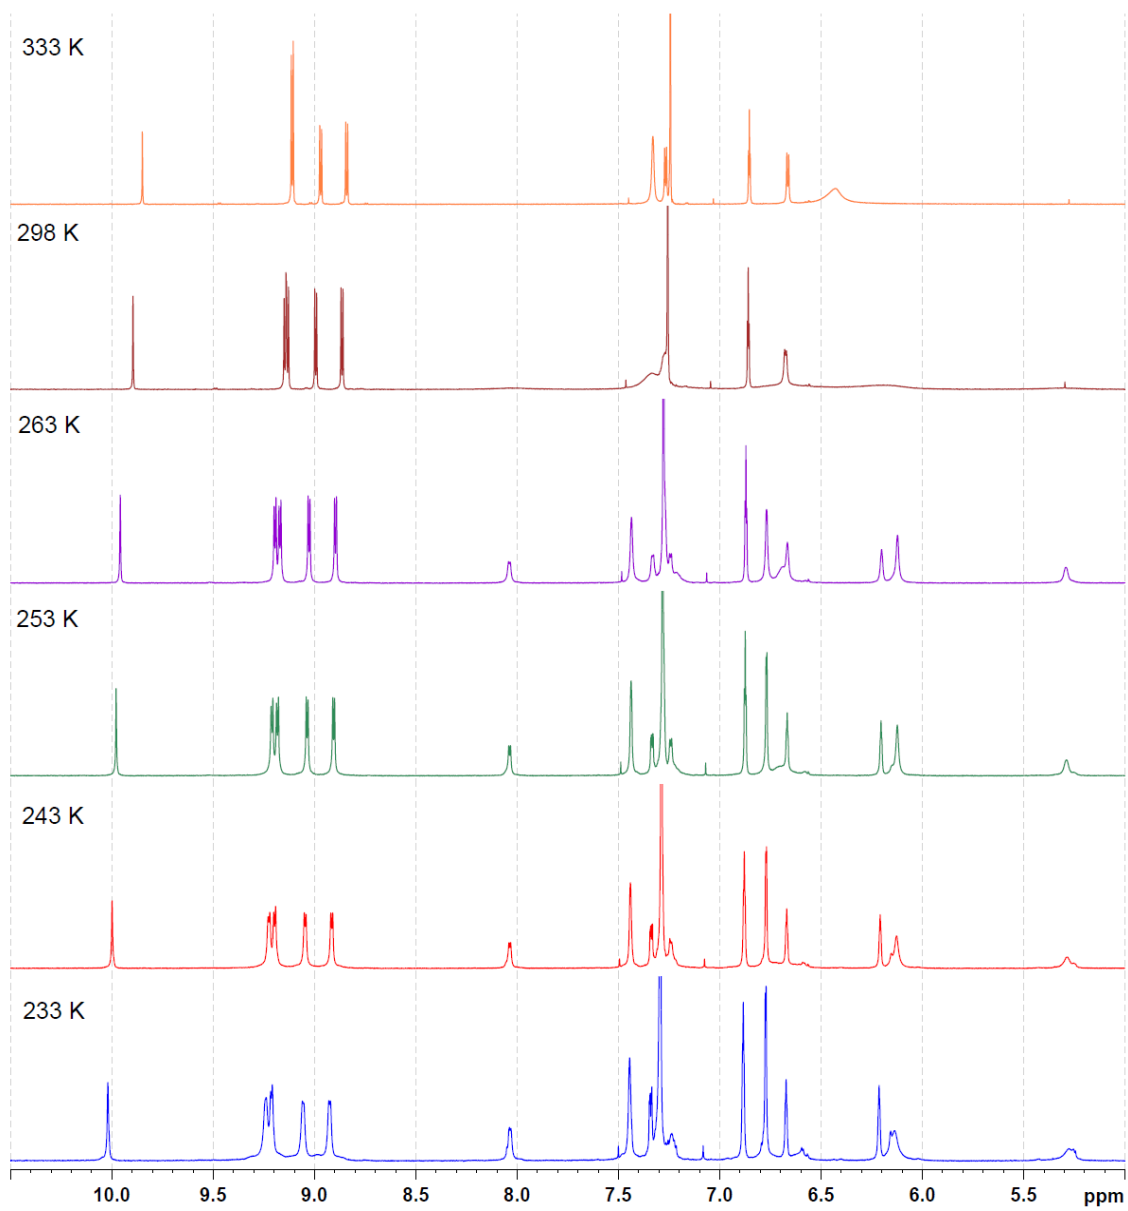

**Fig. S8** <sup>1</sup>H VT NMR spectra (500 MHz, CDCl<sub>3</sub>) of **2(0)**.

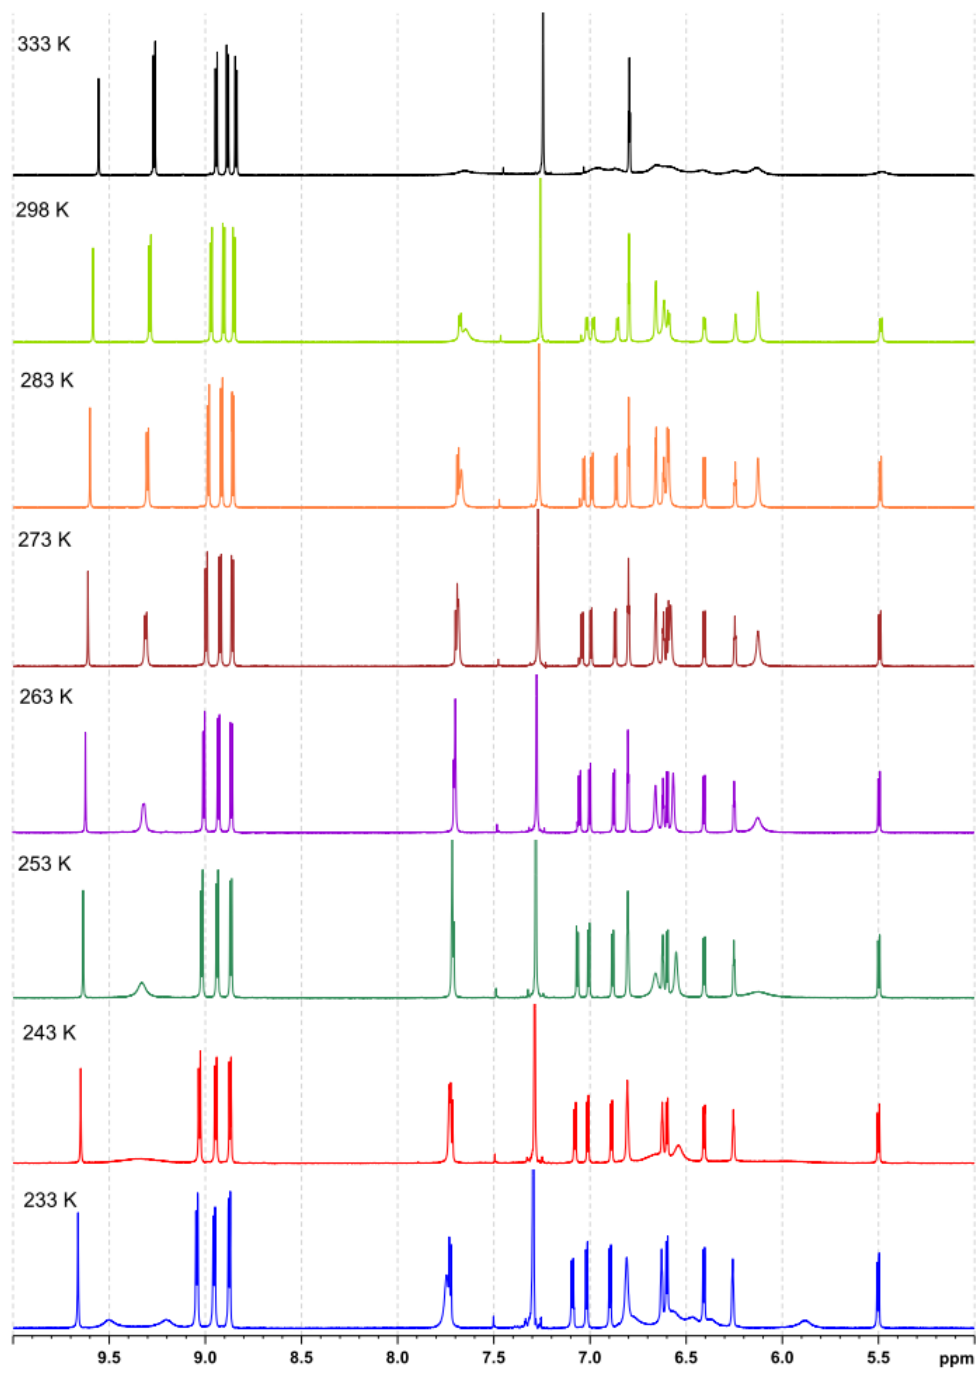

**Fig. S9**  $^1\text{H}$  VT NMR spectra (500 MHz,  $\text{CDCl}_3$ ) of Ni-2(0).

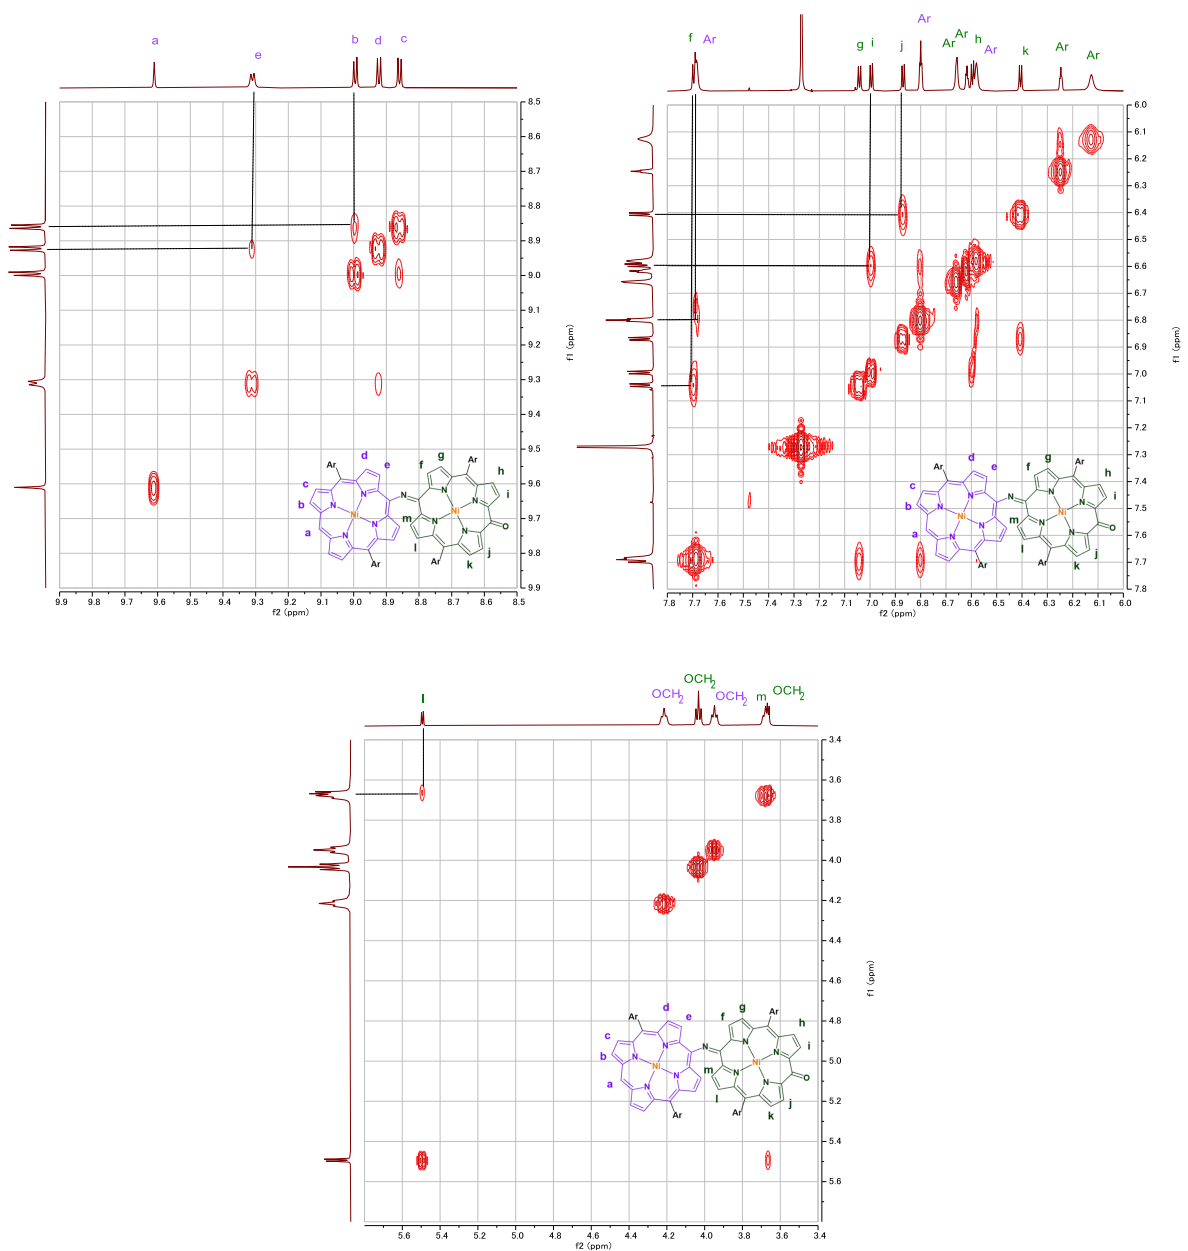

**Fig. S10**  $^1\text{H}$  COSY NMR spectra (500 MHz,  $\text{CDCl}_3$ , 273 K) of Ni-2(0).

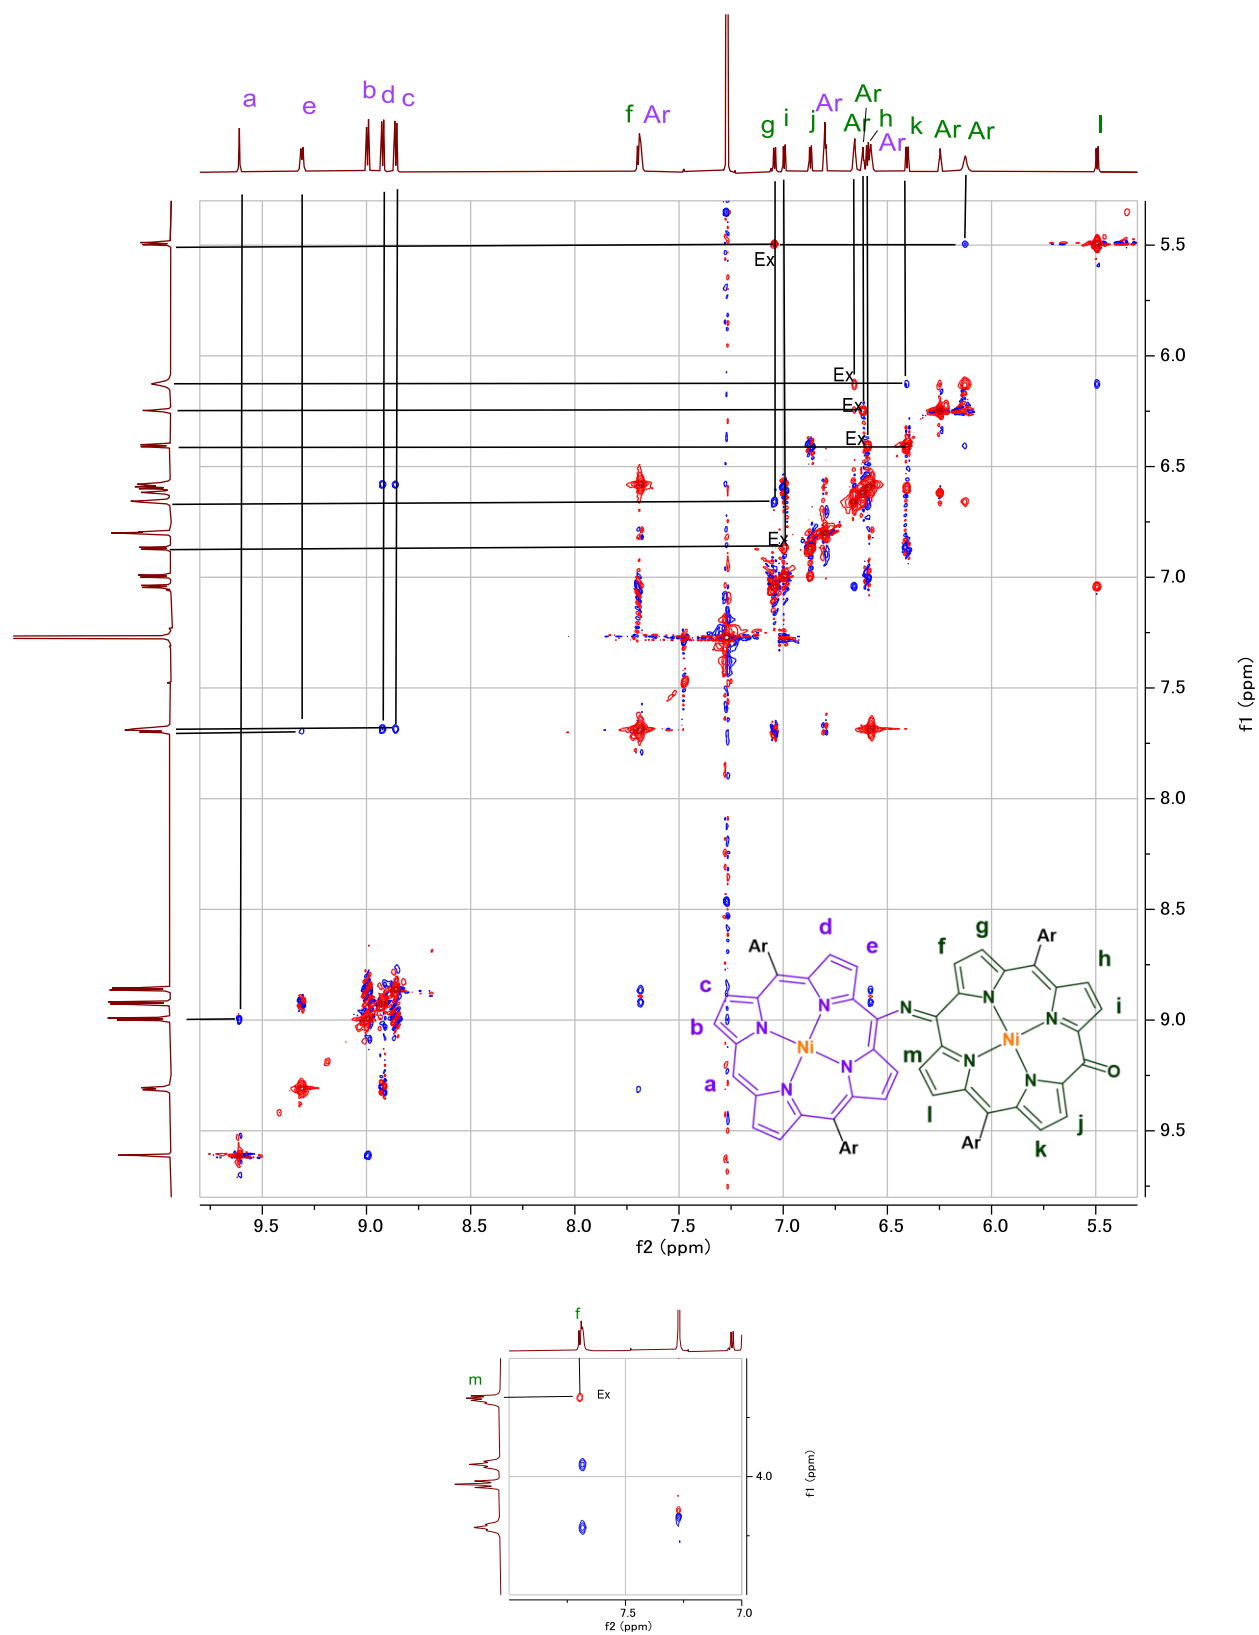

**Fig. S11**  $^1\text{H}$  ROESY NMR spectra (500 MHz,  $\text{CDCl}_3$ , 273 K) of  $\text{Ni-2(0)}$ .

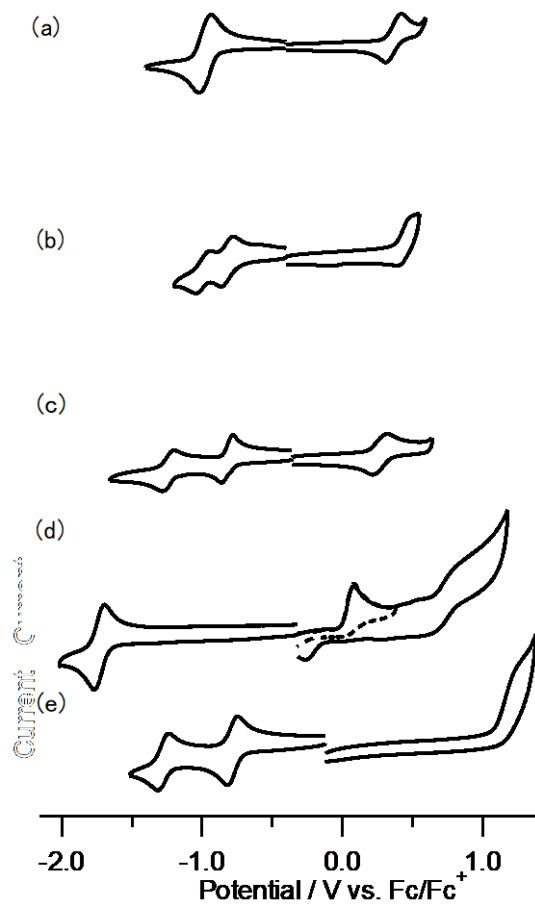

**Fig. S12** Cyclic voltammograms of (a) **2(0)**, (b) **Ni-2(0)**, (c) **2(1)**, (d) **1**, and (e) **3**. Solvent: CH<sub>2</sub>Cl<sub>2</sub> containing 0.1 M *n*Bu<sub>4</sub>NPF<sub>6</sub> (for **2(0)**, **Ni-2(0)**, and **2(1)**), or butyronitrile containing 0.1 M *n*Bu<sub>4</sub>NPF<sub>6</sub> (for **1** and **3**).

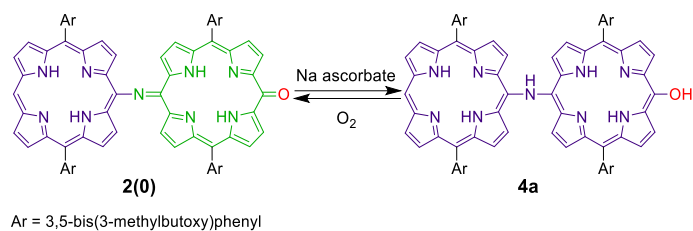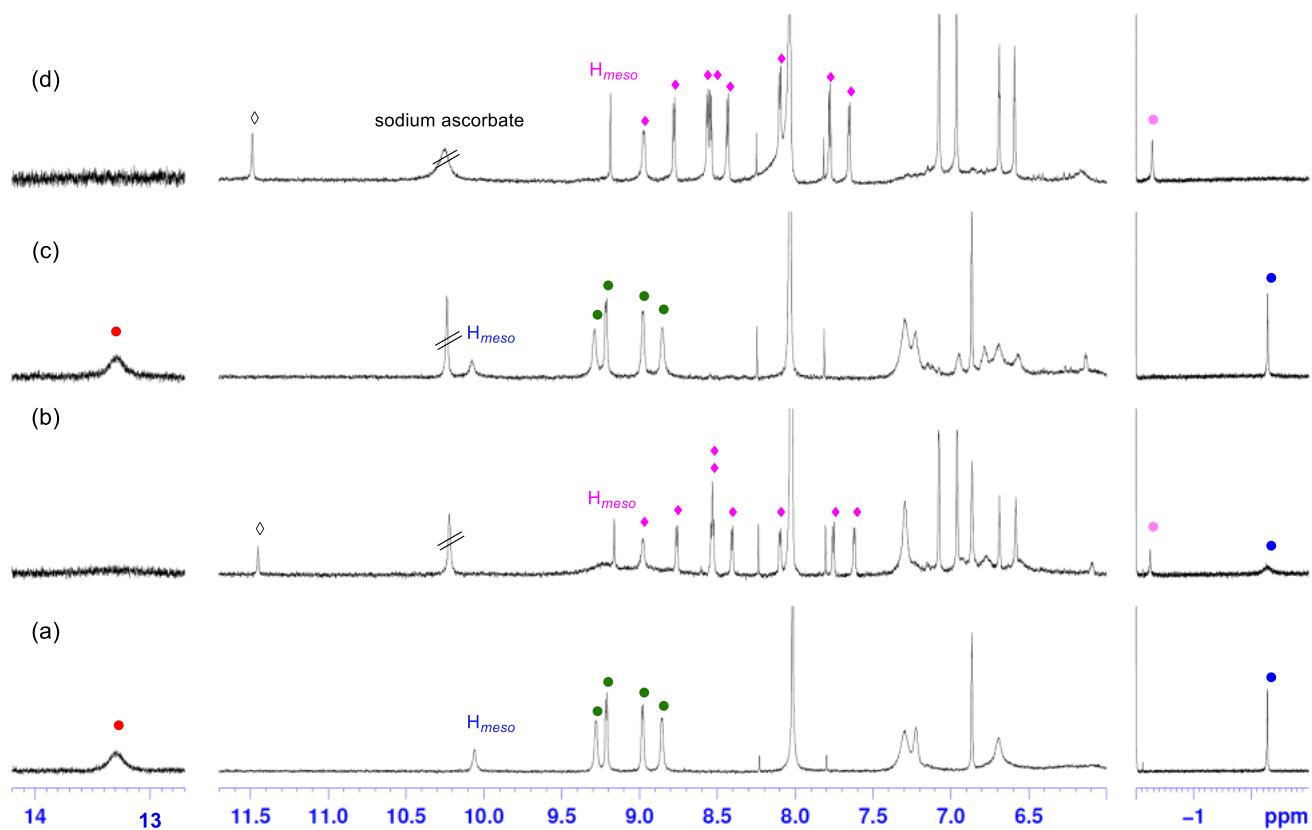

**Fig. S13**  $^1\text{H}$  NMR spectra (500 MHz,  $\text{CDCl}_3$ - $\text{DMSO-}d_6$ ) showing reversible redox interconversion between **2(0)** and **4a**. (a) Before the addition of sodium ascorbate, (b) after the addition of sodium ascorbate, (c) after 4 h under air, and (d) second addition of sodium ascorbate.

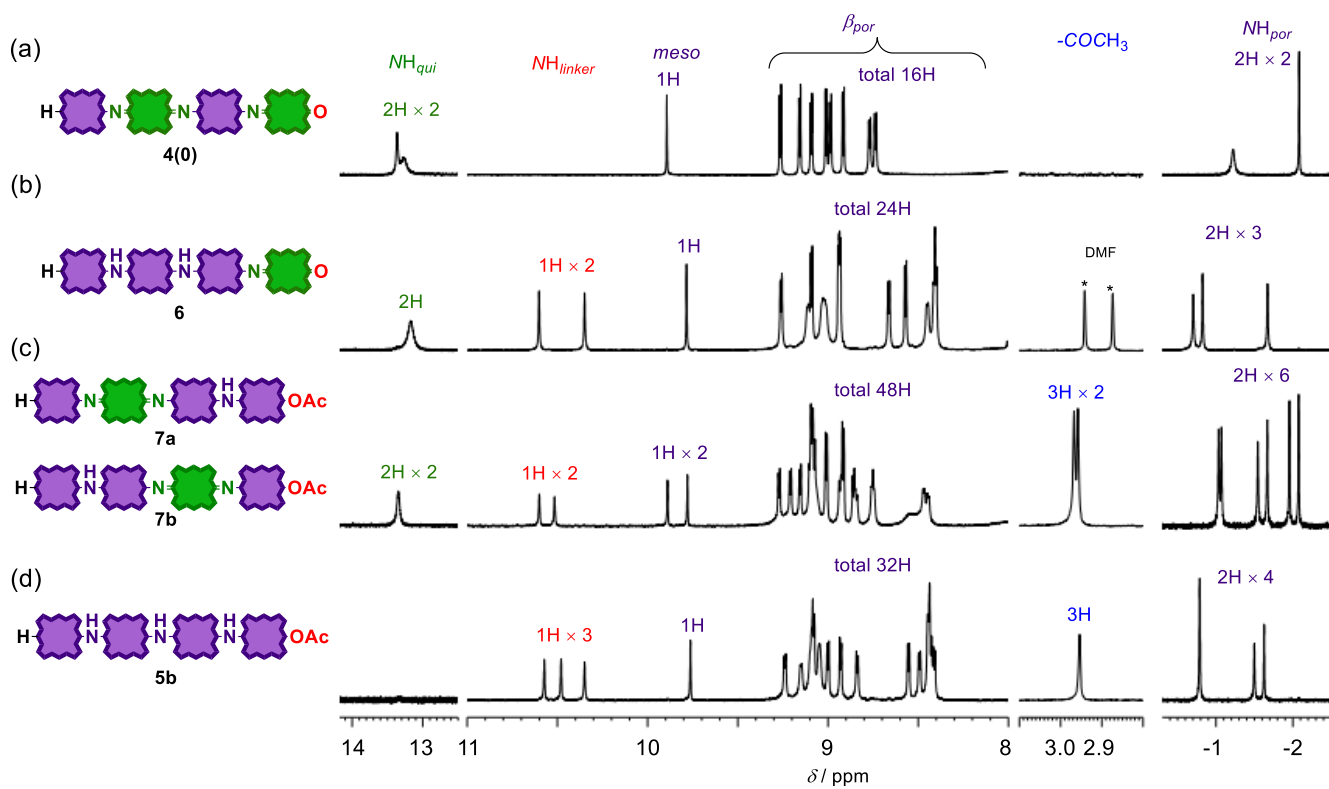

**Fig. S14**  $^1\text{H}$  NMR spectra (500 MHz,  $\text{CDCl}_3$ , 300 K) of (a) **4(0)**, (b) **6**, (c) an equilibrium mixture of **7a** and **7b**, and (d) **5b**.

#### 4. 1D $^1\text{H}$ EXSY measurements for partially reduced tetramers 7

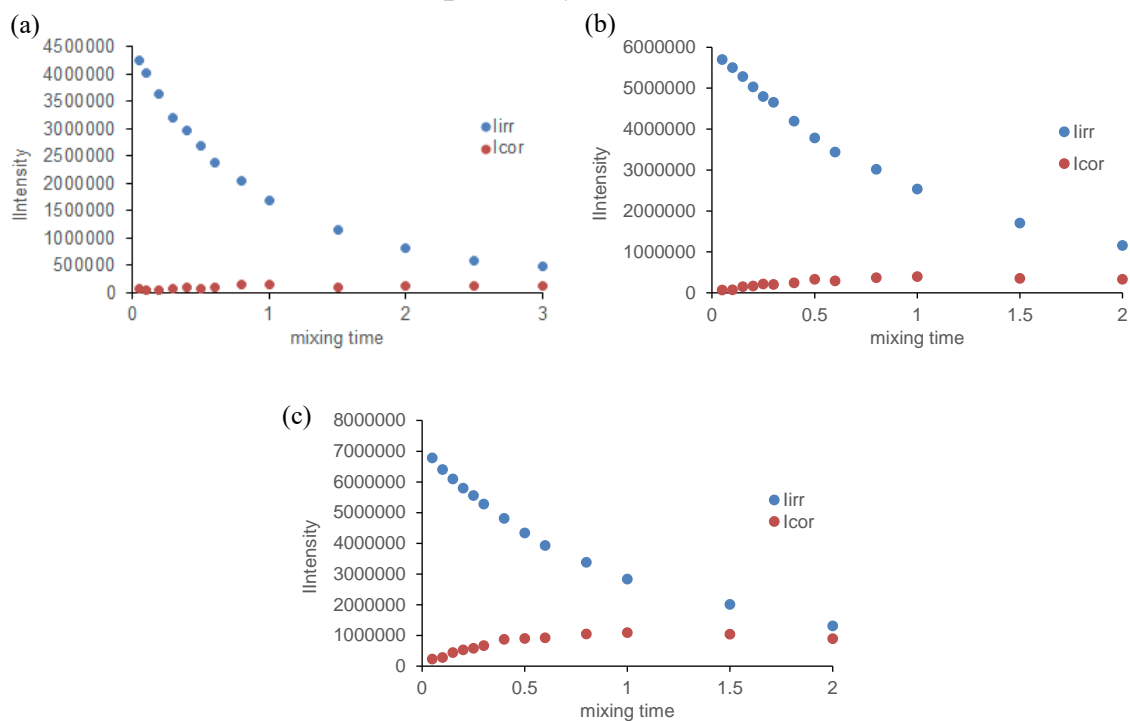

**Fig. S15** Plots of the intensity of irradiated and correlated peaks against the mixing time at (a) 278, (b) 298, and (c) 318 K.

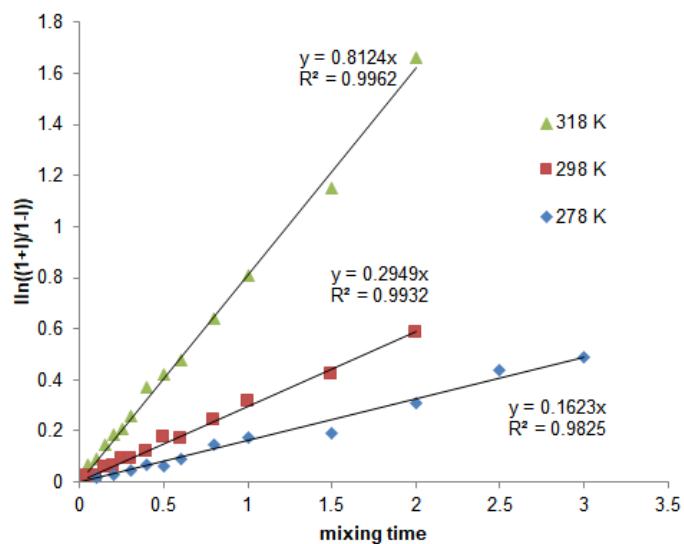

**Fig. S16** Plots of the EXSY results to determine exchange rate constants.



**Table S2** Exchange rate constants determined by EXSY measurements.

| $T$ (K) | $2k$ ( $s^{-1}$ )   |
|---------|---------------------|
| 278     | $0.1624 \pm 0.0004$ |
| 298     | $0.2949 \pm 0.0005$ |
| 318     | $0.8124 \pm 0.0010$ |

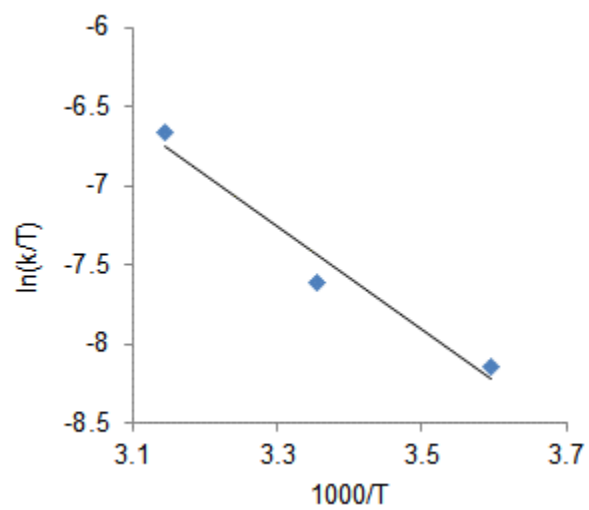

**Fig. S17** Eyring plot.

## 4. DFT calculations

All calculations were carried out using the Gaussian 16 program package (Revision C.01).<sup>5</sup> Geometries of  $2'(0)$  and  $2'(1)$  were optimized by the DFT method at the B3LYP-D3/6-31G(d,p) level while that of the cation radical of  $1'(1^+)$  was optimized at the UB3LYP-D3/6-31+G(d,p) level. To confirm that the optimized geometries were not in the saddle in stable points, frequency calculations were performed. TDDFT calculations of  $2'(0)$  and  $2'(1)$  were performed at the same level using the geometry-optimized models.

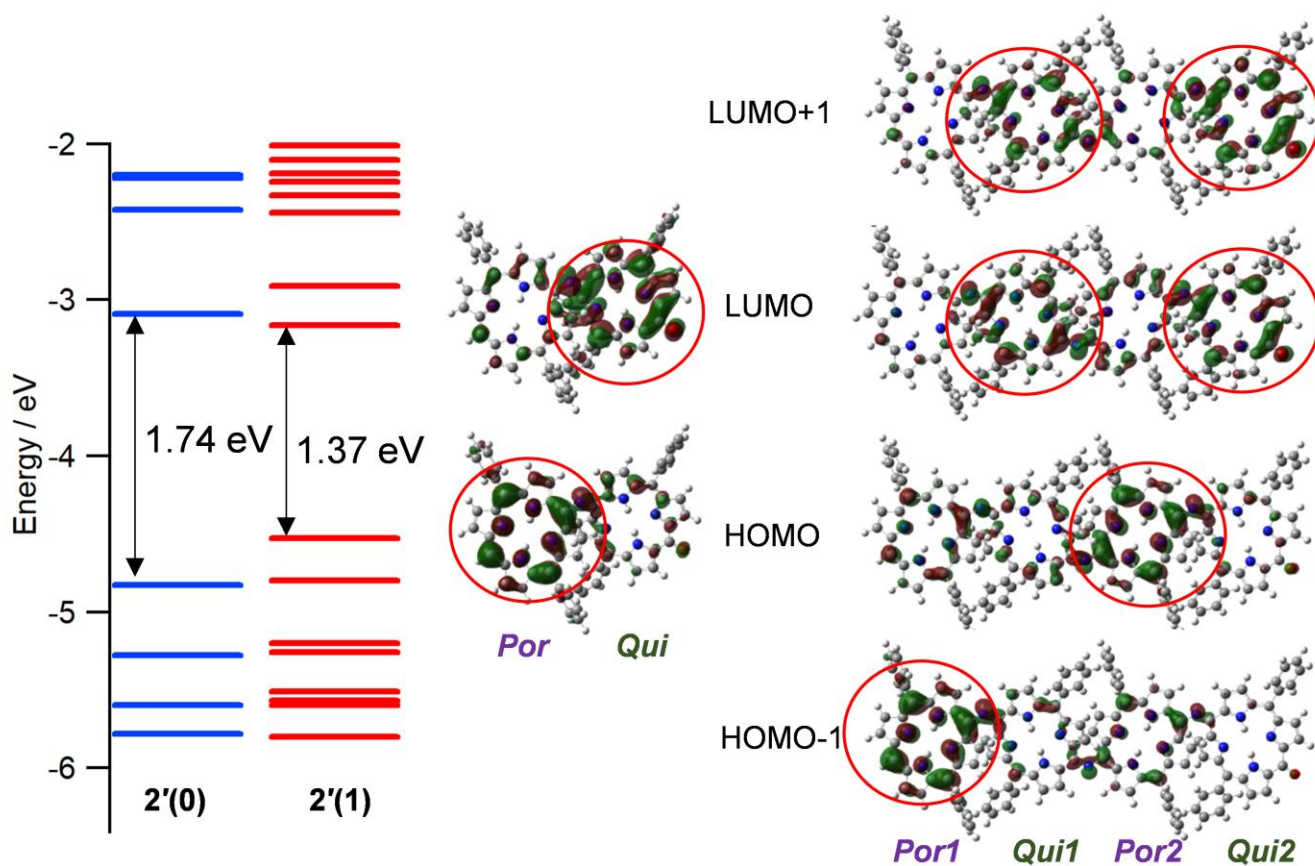

Fig. S18 Frontier orbitals and energy diagrams of  $2'(0)$  and  $2'(1)$  (B3LYP-D3/6-31G(d,p)).

**Table S3.** Summary of the TDDFT calculation of **2'(0)**.

| No. | Energy<br>(cm <sup>-1</sup> ) | Wavelength<br>(nm) | Osc.<br>Strength | Major contribution                                                   |
|-----|-------------------------------|--------------------|------------------|----------------------------------------------------------------------|
| 1   | 12109.61                      | 825.7905           | 0.4233           | HOMO->LUMO (97%)                                                     |
| 2   | 14209.07                      | 703.7759           | 0.0085           | H-1->LUMO (83%)                                                      |
| 3   | 15860.89                      | 630.4815           | 0.0139           | H-2->LUMO (71%), HOMO->L+1 (23%)                                     |
| 4   | 16826.34                      | 594.3064           | 0.0766           | H-2->LUMO (19%), H-1->LUMO (10%), HOMO->L+1 (55%)                    |
| 5   | 17753.88                      | 563.2573           | 0.0197           | H-3->LUMO (11%), HOMO->L+2 (71%)                                     |
| 6   | 18188.61                      | 549.7947           | 0.0417           | H-1->L+2 (14%), HOMO->L+3 (64%)                                      |
| 7   | 19453.29                      | 514.052            | 0.0875           | H-3->LUMO (65%), H-2->L+1 (11%), H-1->L+3 (12%)                      |
| 8   | 21039.78                      | 475.2902           | 0.4085           | H-1->L+1 (68%), H-1->L+2 (11%)                                       |
| 9   | 21612.43                      | 462.6966           | 0.0005           | H-5->LUMO (12%), H-4->LUMO (83%)                                     |
| 10  | 22083.46                      | 452.8276           | 0.0077           | H-9->LUMO (77%)                                                      |
| 11  | 22573.04                      | 443.0064           | 0.3026           | H-2->L+1 (48%), H-1->L+3 (26%)                                       |
| 12  | 22898.89                      | 436.7025           | 0.1415           | H-6->LUMO (10%), H-3->L+1 (20%), H-2->L+2 (12%), H-1->L+2 (29%)      |
| 13  | 23064.23                      | 433.5718           | 0.0161           | H-6->LUMO (75%)                                                      |
| 14  | 23627.21                      | 423.2409           | 0.0305           | H-7->LUMO (55%), H-5->LUMO (18%)                                     |
| 15  | 23754.64                      | 420.9704           | 0.0124           | H-7->LUMO (35%), H-5->LUMO (37%)                                     |
| 16  | 23794.97                      | 420.2569           | 0.0338           | H-3->L+1 (46%), H-2->L+2 (26%)                                       |
| 17  | 24299.87                      | 411.5248           | 0.1021           | H-5->LUMO (10%), H-2->L+3 (51%), HOMO->L+4 (15%)                     |
| 18  | 25101.59                      | 398.3812           | 0.0866           | H-8->LUMO (40%), H-3->L+2 (23%), H-2->L+3 (10%)                      |
| 19  | 25190.31                      | 396.9781           | 0.0307           | H-3->L+2 (15%), H-3->L+3 (33%), HOMO->L+4 (38%)                      |
| 20  | 25365.33                      | 394.2389           | 0.1439           | H-8->LUMO (24%), H-3->L+3 (19%), H-2->L+2 (20%), HOMO->L+4 (11%)     |
| 21  | 26063                         | 383.6857           | 0.3373           | H-5->L+1 (10%), H-4->L+1 (14%), H-3->L+2 (20%), H-3->L+3 (14%)       |
| 22  | 26582.42                      | 376.1885           | 0.1608           | H-4->L+1 (54%)                                                       |
| 23  | 26724.37                      | 374.1902           | 0.2218           | H-13->LUMO (11%), H-12->LUMO (18%), H-10->LUMO (13%), H-3->L+3 (12%) |
| 24  | 26897.78                      | 371.7778           | 0.1153           | H-12->LUMO (11%), H-11->LUMO (39%), H-10->LUMO (23%)                 |
| 25  | 26970.37                      | 370.7772           | 0.0944           | H-11->LUMO (27%), H-10->LUMO (46%)                                   |
| 26  | 27214.76                      | 367.4477           | 0.1348           | H-15->LUMO (26%)                                                     |
| 27  | 27370.42                      | 365.3579           | 0.0435           | H-12->LUMO (21%), H-5->L+1 (14%)                                     |
| 28  | 27819.68                      | 359.4578           | 0.2418           | H-15->LUMO (12%), H-14->LUMO (30%)                                   |
| 29  | 28183.43                      | 354.8184           | 0.0657           | H-15->LUMO (13%), H-14->LUMO (15%), H-5->L+1 (21%), H-4->L+3 (11%)   |
| 30  | 28386.68                      | 352.2779           | 0.0105           | H-13->LUMO (30%), H-12->LUMO (16%), H-4->L+3 (10%)                   |

|    |          |          |        |                                                      |
|----|----------|----------|--------|------------------------------------------------------|
| 31 | 28419.75 | 351.868  | 0.0451 | H-17->LUMO (67%), H-16->LUMO (17%)                   |
| 32 | 28494.76 | 350.9417 | 0.004  | H-15->LUMO (12%), H-14->LUMO (21%), H-13->LUMO (18%) |
| 33 | 28604.45 | 349.5959 | 0.1157 | H-5->L+1 (15%), H-5->L+3 (11%), H-4->L+3 (31%)       |
| 34 | 28776.25 | 347.5088 | 0.0128 | H-16->LUMO (39%), H-13->LUMO (10%), H-4->L+2 (21%)   |
| 35 | 28932.72 | 345.6294 | 0.003  | H-6->L+1 (66%), H-6->L+3 (10%)                       |
| 36 | 29071.45 | 343.9801 | 0.1552 | H-4->L+2 (25%)                                       |
| 37 | 29139.2  | 343.1803 | 0.0117 | H-21->LUMO (10%), H-18->LUMO (58%)                   |
| 38 | 29235.98 | 342.0442 | 0.0068 | H-19->LUMO (68%)                                     |
| 39 | 29373.91 | 340.4382 | 0.1799 | H-7->L+1 (32%), H-1->L+4 (27%)                       |
| 40 | 29433.59 | 339.7479 | 0.2136 | H-21->LUMO (17%), H-7->L+1 (24%), H-1->L+4 (27%)     |

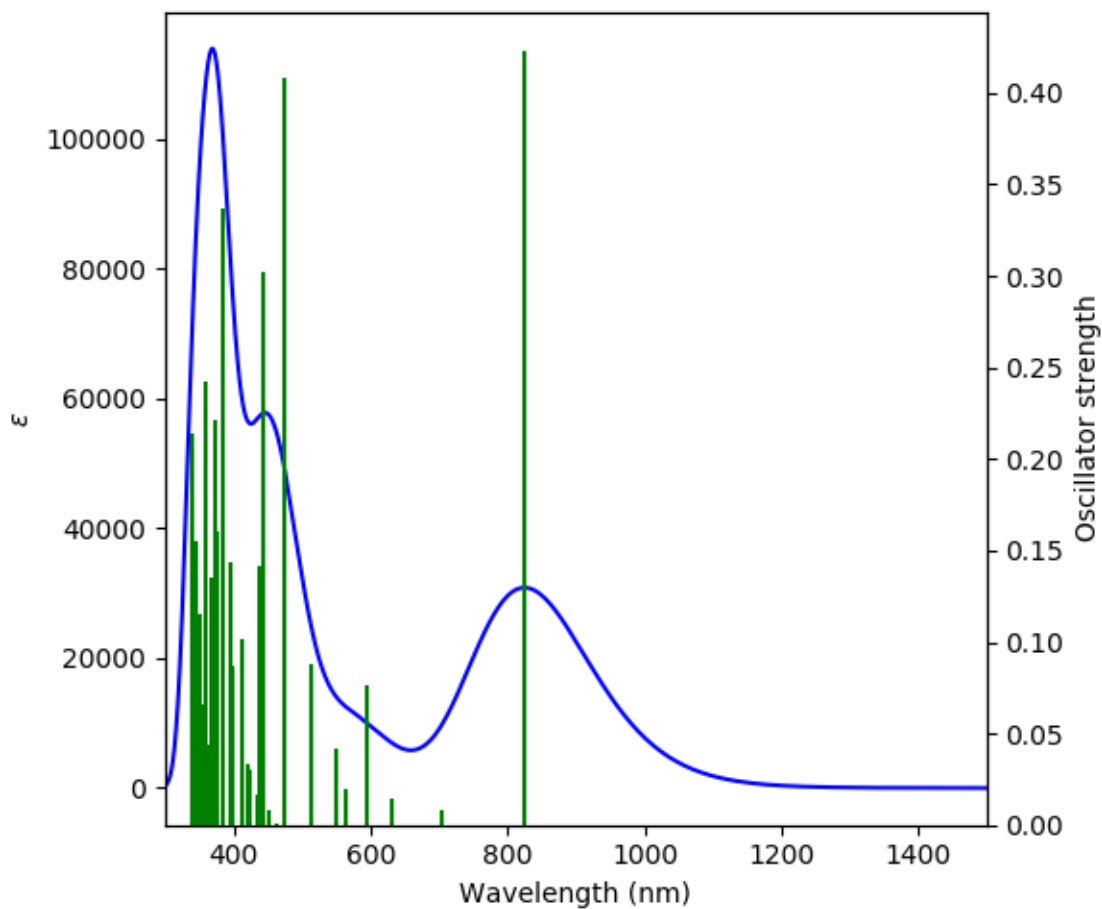

**Fig. S19** Calculated (TDDFT) UV/vis/NIR absorption spectrum of **2'(0)**.

**Table S4.** Summary of the TDDFT calculation of **2'(1)**.

| No. | Energy (cm <sup>-1</sup> ) | Wavelength (nm) | Osc. Strength | Major contribution                                                |
|-----|----------------------------|-----------------|---------------|-------------------------------------------------------------------|
| 1   | 9349.579                   | 1069.567        | 1.8069        | HOMO->LUMO (98%)                                                  |
| 2   | 11230.46                   | 890.4352        | 0.0002        | H-1->LUMO (31%), HOMO->L+1 (64%)                                  |
| 3   | 11714.4                    | 853.6505        | 0.0103        | H-1->LUMO (62%), HOMO->L+1 (32%)                                  |
| 4   | 13211.36                   | 756.9243        | 0.0072        | H-3->LUMO (13%), H-2->LUMO (53%), HOMO->L+2 (23%)                 |
| 5   | 13499.3                    | 740.7791        | 0.0845        | H-1->L+1 (87%)                                                    |
| 6   | 14013.08                   | 713.6192        | 0.0254        | H-3->LUMO (48%), H-2->LUMO (14%), H-2->L+1 (13%)                  |
| 7   | 14471.2                    | 691.0277        | 0.0068        | H-2->LUMO (12%), HOMO->L+2 (60%)                                  |
| 8   | 15085.79                   | 662.8753        | 0.0131        | H-4->LUMO (36%), H-3->L+1 (21%), H-2->L+1 (11%), HOMO->L+3 (12%)  |
| 9   | 15481.01                   | 645.9529        | 0.048         | H-3->LUMO (13%), HOMO->L+3 (51%), HOMO->L+5 (10%)                 |
| 10  | 16014.94                   | 624.4168        | 0.0125        | H-6->LUMO (35%), H-4->L+1 (12%), HOMO->L+6 (11%)                  |
| 11  | 16110.92                   | 620.6968        | 0.0071        | H-6->LUMO (11%), H-4->LUMO (20%), H-2->L+1 (28%)                  |
| 12  | 16267.4                    | 614.7265        | 0.0074        | HOMO->L+4 (73%)                                                   |
| 13  | 16516.62                   | 605.4507        | 0.0615        | H-4->LUMO (14%), H-3->LUMO (10%), H-3->L+1 (12%), HOMO->L+5 (27%) |
| 14  | 16798.11                   | 595.3051        | 0.0803        | H-1->L+2 (65%)                                                    |
| 15  | 16953.77                   | 589.8392        | 0.0143        | H-3->L+1 (22%), H-2->L+1 (16%), HOMO->L+5 (18%), HOMO->L+6 (10%)  |
| 16  | 17365.12                   | 575.8671        | 0.047         | H-5->LUMO (53%)                                                   |
| 17  | 17473.2                    | 572.3052        | 0.0021        | H-6->LUMO (10%), H-3->L+1 (13%), HOMO->L+6 (50%)                  |
| 18  | 17739.36                   | 563.7183        | 0.0624        | H-5->LUMO (16%), HOMO->L+7 (37%)                                  |
| 19  | 18059.56                   | 553.7233        | 0.0038        | H-1->L+2 (10%), H-1->L+3 (62%)                                    |
| 20  | 18417.67                   | 542.9568        | 0.0067        | H-1->L+4 (46%), H-1->L+5 (13%), HOMO->L+7 (22%)                   |
| 21  | 18757.23                   | 533.1278        | 0.0099        | H-1->L+4 (10%), H-1->L+5 (30%), H-1->L+6 (20%)                    |
| 22  | 18804.82                   | 531.7787        | 0.078         | H-6->LUMO (13%), H-4->L+1 (61%)                                   |
| 23  | 19227.45                   | 520.0897        | 0.0017        | H-7->LUMO (26%), H-6->L+1 (37%), H-5->L+1 (17%)                   |
| 24  | 19257.29                   | 519.2838        | 0.2929        | H-7->LUMO (44%), H-6->L+1 (10%), H-5->L+1 (11%)                   |
| 25  | 19507.33                   | 512.6279        | 0.0324        | H-6->L+1 (29%), H-5->L+1 (45%)                                    |
| 26  | 19731.55                   | 506.8026        | 0.0015        | H-1->L+5 (17%), H-1->L+6 (40%), H-1->L+7 (12%)                    |
| 27  | 19951.74                   | 501.2095        | 0.2632        | H-2->L+2 (17%), H-1->L+7 (42%)                                    |
| 28  | 20105.79                   | 497.3692        | 0.9714        | H-2->L+2 (59%)                                                    |
| 29  | 20701.83                   | 483.049         | 0.0754        | H-8->LUMO (10%), H-7->L+1 (45%)                                   |
| 30  | 20817.17                   | 480.3727        | 0.0123        | H-3->L+2 (55%)                                                    |

|    |          |          |        |                                                                |
|----|----------|----------|--------|----------------------------------------------------------------|
| 31 | 21250.29 | 470.5818 | 0.0092 | H-8->LUMO (14%), H-3->L+3 (12%), H-2->L+3 (38%)                |
| 32 | 21440.64 | 466.4041 | 0.0006 | H-8->LUMO (46%), H-7->L+1 (23%)                                |
| 33 | 21526.13 | 464.5517 | 0.0068 | H-9->LUMO (60%), H-9->L+1 (14%)                                |
| 34 | 21928.6  | 456.0254 | 0.0162 | H-11->LUMO (61%)                                               |
| 35 | 21945.54 | 455.6735 | 0.0351 | H-3->L+3 (41%), H-2->L+3 (16%), H-2->L+6 (11%)                 |
| 36 | 22019.74 | 454.1379 | 0.0222 | H-17->LUMO (39%), H-17->L+1 (26%)                              |
| 37 | 22127.82 | 451.9198 | 0.1146 | H-5->L+2 (22%), H-4->L+2 (18%), H-2->L+4 (30%)                 |
| 38 | 22160.89 | 451.2454 | 0.304  | H-5->L+2 (10%), H-4->L+2 (18%), H-3->L+4 (11%), H-2->L+4 (23%) |
| 39 | 22340.75 | 447.6125 | 0.1063 | H-5->L+2 (16%), H-3->L+5 (10%), H-2->L+5 (27%)                 |
| 40 | 22452.86 | 445.3775 | 0.0044 | H-12->LUMO (15%), HOMO->L+8 (38%)                              |

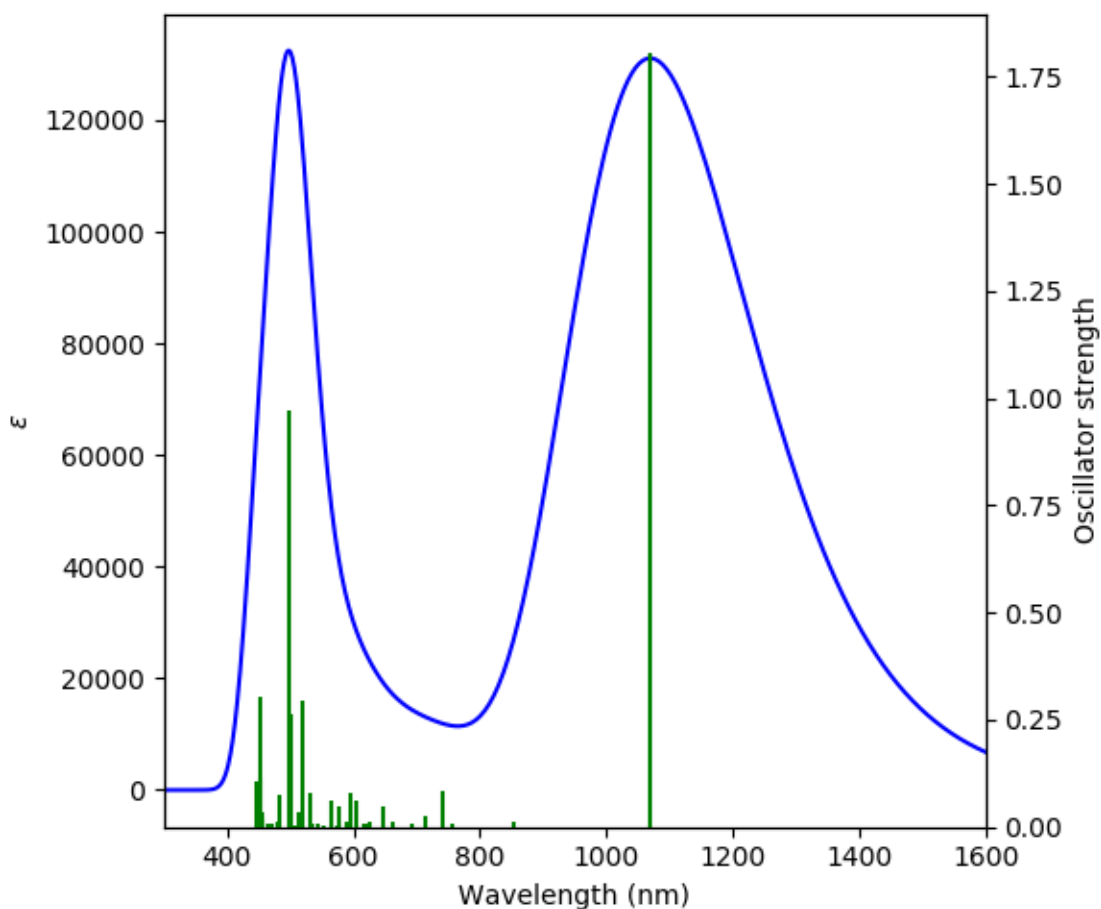

**Fig. S20** Calculated (TDDFT) UV/vis/NIR absorption spectrum of **2'(1)**.

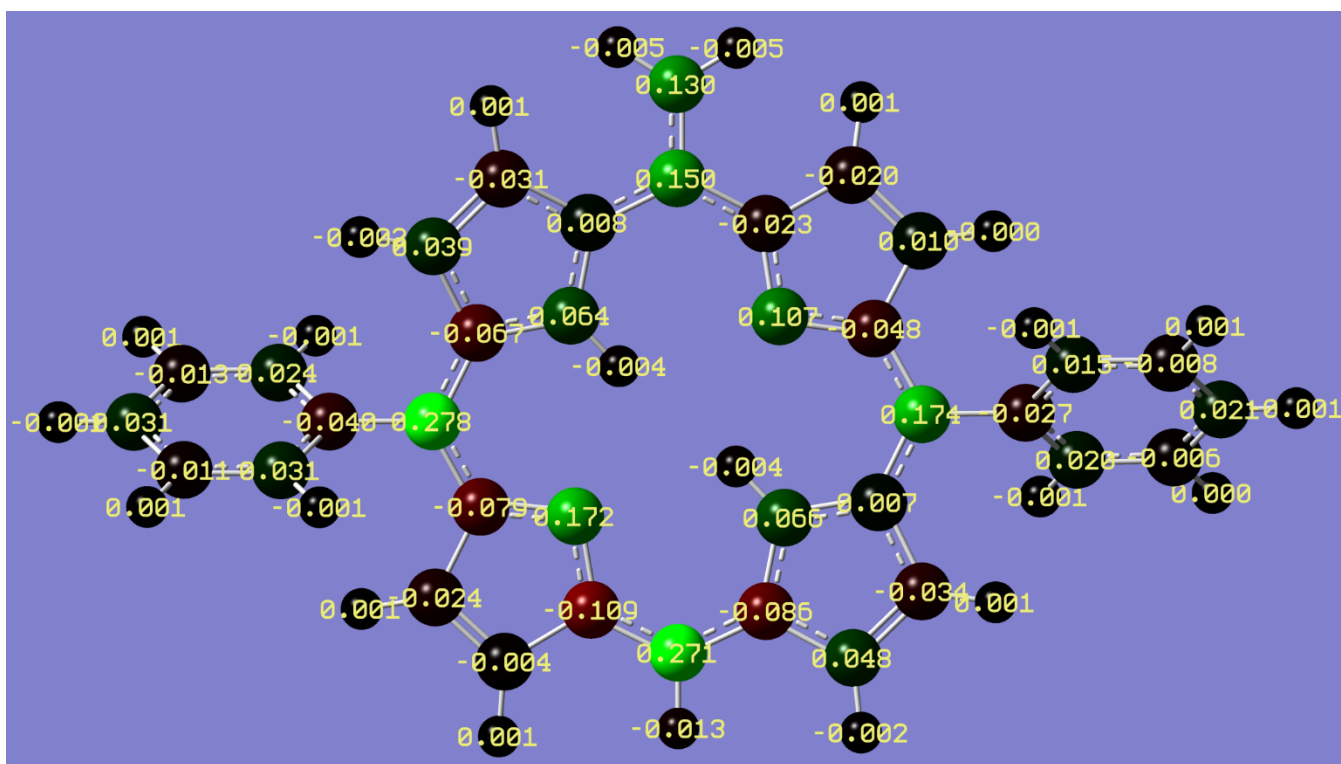

**Fig. S21** Spin distribution of the oxidized radical cation of **1'** (**1''<sup>+</sup>**).

**Table S5** Cartesian coordinates for the optimized structure of **2'(0)**.Stoichiometry: C<sub>64</sub>H<sub>41</sub>N<sub>9</sub>O, full point group: C1, charge: 0, multiplicity: 1.

Total energy: -3031.6670144 a.u., No. of imaginary freq: 0.

| Center No. | Atomic No. | Atomic type | Coordinates (Angstroms) |          |          |
|------------|------------|-------------|-------------------------|----------|----------|
|            |            |             | X                       | Y        | Z        |
| 1          | 6          | 0           | 6.325698                | -3.78207 | -0.79745 |
| 2          | 6          | 0           | 5.084039                | -4.20873 | -1.19425 |
| 3          | 6          | 0           | 4.199637                | -3.07893 | -1.16888 |
| 4          | 7          | 0           | 4.94569                 | -2.00474 | -0.74895 |
| 5          | 6          | 0           | 6.246864                | -2.3789  | -0.52306 |
| 6          | 6          | 0           | 8.063599                | 1.898608 | 0.488601 |
| 7          | 6          | 0           | 8.461262                | 0.608057 | 0.373243 |
| 8          | 6          | 0           | 7.263916                | -0.1632  | 0.064046 |
| 9          | 7          | 0           | 6.163402                | 0.639034 | 0.000569 |
| 10         | 6          | 0           | 6.617111                | 1.900066 | 0.267082 |
| 11         | 6          | 0           | 7.295411                | -1.5438  | -0.14905 |
| 12         | 6          | 0           | 2.251167                | 3.711691 | -0.03042 |
| 13         | 6          | 0           | 3.517557                | 4.159039 | 0.250671 |
| 14         | 6          | 0           | 4.422867                | 3.062069 | 0.085529 |
| 15         | 7          | 0           | 3.664559                | 1.982021 | -0.30961 |
| 16         | 6          | 0           | 2.340423                | 2.331469 | -0.386   |
| 17         | 6          | 0           | 5.810221                | 3.054523 | 0.324271 |
| 18         | 6          | 0           | 0.666255                | -1.83617 | -1.9905  |
| 19         | 6          | 0           | 0.228562                | -0.57049 | -1.78064 |
| 20         | 6          | 0           | 1.346139                | 0.151673 | -1.18721 |
| 21         | 7          | 0           | 2.454025                | -0.62995 | -1.11015 |
| 22         | 6          | 0           | 2.058596                | -1.86623 | -1.56236 |
| 23         | 6          | 0           | 2.850008                | -3.03274 | -1.55363 |
| 24         | 6          | 0           | 1.248994                | 1.492627 | -0.71209 |
| 25         | 1          | 0           | 7.230846                | -4.36758 | -0.71437 |
| 26         | 1          | 0           | 4.792743                | -5.20297 | -1.49647 |
| 27         | 1          | 0           | 8.670348                | 2.768492 | 0.69132  |
| 28         | 1          | 0           | 9.460132                | 0.201802 | 0.468254 |
| 29         | 1          | 0           | 8.259618                | -2.03022 | -0.03665 |
| 30         | 1          | 0           | 1.327537                | 4.267961 | -0.00766 |
| 31         | 1          | 0           | 3.810719                | 5.151417 | 0.556182 |
| 32         | 1          | 0           | 0.109261                | -2.66551 | -2.39902 |
| 33         | 1          | 0           | -0.74915                | -0.171   | -1.9998  |
| 34         | 6          | 0           | -1.04592                | 1.60337  | -0.08798 |
| 35         | 6          | 0           | -1.06659                | 0.347062 | 0.693223 |
| 36         | 6          | 0           | -2.25169                | 2.415816 | -0.2238  |
| 37         | 6          | 0           | 0.034317                | -0.09467 | 1.53107  |
| 38         | 7          | 0           | -2.07454                | -0.5174  | 0.672909 |
| 39         | 6          | 0           | -2.30528                | 3.803637 | -0.44779 |
| 40         | 7          | 0           | -3.52811                | 1.9552   | -0.12493 |
| 41         | 6          | 0           | -0.31987                | -1.32639 | 1.985401 |
| 42         | 1          | 0           | 0.944023                | 0.452489 | 1.72793  |
| 43         | 6          | 0           | -1.62936                | -1.61128 | 1.428433 |
| 44         | 6          | 0           | -3.64469                | 4.170255 | -0.4589  |
| 45         | 1          | 0           | -1.43777                | 4.434664 | -0.55894 |
| 46         | 6          | 0           | -4.41937                | 2.997925 | -0.28405 |
| 47         | 1          | 0           | 0.238636                | -1.97414 | 2.64434  |



|     |   |   |          |          |          |
|-----|---|---|----------|----------|----------|
| 48  | 6 | 0 | -2.31618 | -2.80977 | 1.55682  |
| 49  | 7 | 0 | -4.54028 | -2.05744 | 0.73157  |
| 50  | 7 | 0 | -5.98771 | 0.415394 | -0.01739 |
| 51  | 1 | 0 | -4.04765 | 5.164277 | -0.57427 |
| 52  | 6 | 0 | -5.83593 | 2.871587 | -0.29805 |
| 53  | 6 | 0 | -3.65843 | -3.03845 | 1.119967 |
| 54  | 6 | 0 | -5.7366  | -2.61733 | 0.393009 |
| 55  | 6 | 0 | -6.55242 | 1.681861 | -0.19896 |
| 56  | 6 | 0 | -7.01606 | -0.43025 | -0.10303 |
| 57  | 6 | 0 | -4.34063 | -4.27241 | 1.007743 |
| 58  | 6 | 0 | -5.62917 | -4.00637 | 0.554412 |
| 59  | 6 | 0 | -6.95539 | -1.90711 | -0.01106 |
| 60  | 6 | 0 | -7.9884  | 1.56518  | -0.38722 |
| 61  | 6 | 0 | -8.27673 | 0.236137 | -0.33386 |
| 62  | 1 | 0 | -3.9081  | -5.23599 | 1.228811 |
| 63  | 1 | 0 | -6.43268 | -4.69912 | 0.357419 |
| 64  | 1 | 0 | -8.66635 | 2.386126 | -0.56719 |
| 65  | 1 | 0 | -9.22512 | -0.26698 | -0.44656 |
| 66  | 7 | 0 | 0.022456 | 2.130784 | -0.61008 |
| 67  | 8 | 0 | -7.97039 | -2.56468 | -0.25608 |
| 68  | 6 | 0 | 6.439136 | 4.358943 | 0.686132 |
| 69  | 6 | 0 | 6.422722 | 5.4356   | -0.21479 |
| 70  | 6 | 0 | 7.053901 | 4.538039 | 1.93554  |
| 71  | 6 | 0 | 7.007278 | 6.655985 | 0.122768 |
| 72  | 1 | 0 | 5.953951 | 5.303708 | -1.18511 |
| 73  | 6 | 0 | 7.639137 | 5.758118 | 2.272708 |
| 74  | 1 | 0 | 7.063174 | 3.712942 | 2.640827 |
| 75  | 6 | 0 | 7.617725 | 6.820995 | 1.367536 |
| 76  | 1 | 0 | 6.99067  | 7.475963 | -0.5893  |
| 77  | 1 | 0 | 8.106649 | 5.880003 | 3.245471 |
| 78  | 1 | 0 | 8.073207 | 7.771142 | 1.630457 |
| 79  | 6 | 0 | 2.216709 | -4.32956 | -1.94038 |
| 80  | 6 | 0 | 1.765995 | -4.56494 | -3.24749 |
| 81  | 6 | 0 | 2.051559 | -5.33911 | -0.98008 |
| 82  | 6 | 0 | 1.152836 | -5.7732  | -3.57958 |
| 83  | 1 | 0 | 1.897811 | -3.79248 | -3.99869 |
| 84  | 6 | 0 | 1.435949 | -6.54614 | -1.30998 |
| 85  | 1 | 0 | 2.407684 | -5.16027 | 0.029692 |
| 86  | 6 | 0 | 0.982511 | -6.7655  | -2.61185 |
| 87  | 1 | 0 | 0.808997 | -5.94008 | -4.59615 |
| 88  | 1 | 0 | 1.301552 | -7.3088  | -0.54849 |
| 89  | 1 | 0 | 0.499951 | -7.70307 | -2.87101 |
| 90  | 6 | 0 | -1.61912 | -3.97419 | 2.170319 |
| 91  | 6 | 0 | -0.4088  | -4.44522 | 1.634553 |
| 92  | 6 | 0 | -2.17044 | -4.62751 | 3.285229 |
| 93  | 6 | 0 | 0.232084 | -5.54279 | 2.208028 |
| 94  | 1 | 0 | 0.013337 | -3.95921 | 0.760629 |
| 95  | 6 | 0 | -1.51878 | -5.71506 | 3.863    |
| 96  | 1 | 0 | -3.10673 | -4.26785 | 3.699457 |
| 97  | 6 | 0 | -0.31602 | -6.17688 | 3.324133 |
| 98  | 1 | 0 | 1.159802 | -5.90704 | 1.779334 |
| 99  | 1 | 0 | -1.94972 | -6.20116 | 4.733132 |
| 100 | 1 | 0 | 0.189354 | -7.02839 | 3.770148 |
| 101 | 6 | 0 | -6.60682 | 4.139814 | -0.46705 |
| 102 | 6 | 0 | -6.49838 | 4.89701  | -1.64329 |
| 103 | 6 | 0 | -7.45997 | 4.585871 | 0.553194 |

|     |   |   |          |          |          |
|-----|---|---|----------|----------|----------|
| 104 | 6 | 0 | -7.23014 | 6.074139 | -1.79535 |
| 105 | 1 | 0 | -5.84699 | 4.550307 | -2.43914 |
| 106 | 6 | 0 | -8.18435 | 5.767891 | 0.402319 |
| 107 | 1 | 0 | -7.54668 | 4.000528 | 1.462925 |
| 108 | 6 | 0 | -8.07227 | 6.51416  | -0.77217 |
| 109 | 1 | 0 | -7.14497 | 6.645098 | -2.71511 |
| 110 | 1 | 0 | -8.83627 | 6.104823 | 1.202705 |
| 111 | 1 | 0 | -8.63948 | 7.432532 | -0.89056 |
| 112 | 1 | 0 | 4.569086 | -1.06944 | -0.6394  |
| 113 | 1 | 0 | 4.050366 | 1.055732 | -0.45922 |
| 114 | 1 | 0 | -3.80313 | 0.986232 | -0.00331 |
| 115 | 1 | 0 | -4.32049 | -1.07075 | 0.668058 |

---

**Table S6** Cartesian coordinates for the optimized structure of **2'(1)**.Stoichiometry: C<sub>128</sub>H<sub>81</sub>N<sub>19</sub>O, full point group: C1, charge: 0, multiplicity: 1.

Total energy: -6042.2590294 a.u., No. of imaginary freq: 0.

| Center No. | Atomic No. | Atomic type | Coordinates (Angstroms) |          |          |
|------------|------------|-------------|-------------------------|----------|----------|
|            |            |             | X                       | Y        | Z        |
| 1          | 6          | 0           | 14.80774                | -3.85298 | -0.56257 |
| 2          | 6          | 0           | 13.59591                | -4.24922 | -1.06819 |
| 3          | 6          | 0           | 12.73402                | -3.10232 | -1.10022 |
| 4          | 7          | 0           | 13.46227                | -2.04925 | -0.60152 |
| 5          | 6          | 0           | 14.73253                | -2.45226 | -0.27355 |
| 6          | 6          | 0           | 16.5299                 | 1.772429 | 0.97002  |
| 7          | 6          | 0           | 16.91487                | 0.477817 | 0.858331 |
| 8          | 6          | 0           | 15.73442                | -0.26573 | 0.435949 |
| 9          | 7          | 0           | 14.6562                 | 0.557098 | 0.300252 |
| 10         | 6          | 0           | 15.10624                | 1.804528 | 0.63223  |
| 11         | 6          | 0           | 15.76088                | -1.64302 | 0.200154 |
| 12         | 6          | 0           | 10.80339                | 3.691562 | 0.038011 |
| 13         | 6          | 0           | 12.04944                | 4.111773 | 0.432029 |
| 14         | 6          | 0           | 12.95115                | 3.007313 | 0.304236 |
| 15         | 7          | 0           | 12.21416                | 1.951726 | -0.1842  |
| 16         | 6          | 0           | 10.90404                | 2.322922 | -0.35377 |
| 17         | 6          | 0           | 14.3154                 | 2.97043  | 0.653934 |
| 18         | 6          | 0           | 9.312569                | -1.77361 | -2.207   |
| 19         | 6          | 0           | 8.879589                | -0.50421 | -2.00665 |
| 20         | 6          | 0           | 9.953019                | 0.183215 | -1.30256 |
| 21         | 7          | 0           | 11.03584                | -0.62068 | -1.14664 |
| 22         | 6          | 0           | 10.65971                | -1.83964 | -1.65833 |
| 23         | 6          | 0           | 11.42495                | -3.02229 | -1.59963 |
| 24         | 6          | 0           | 9.832679                | 1.511539 | -0.79533 |
| 25         | 1          | 0           | 15.69155                | -4.45759 | -0.41301 |
| 26         | 1          | 0           | 13.31211                | -5.23327 | -1.40871 |
| 27         | 1          | 0           | 17.13208                | 2.626809 | 1.240953 |
| 28         | 1          | 0           | 17.896                  | 0.051923 | 1.025331 |
| 29         | 1          | 0           | 16.70412                | -2.14872 | 0.383048 |
| 30         | 1          | 0           | 9.887179                | 4.259843 | 0.00607  |
| 31         | 1          | 0           | 12.32938                | 5.089704 | 0.791748 |
| 32         | 1          | 0           | 8.780778                | -2.58352 | -2.68284 |
| 33         | 1          | 0           | 7.932177                | -0.07998 | -2.30073 |
| 34         | 6          | 0           | 7.491369                | 1.628807 | -0.37032 |
| 35         | 6          | 0           | 7.393004                | 0.378996 | 0.408728 |
| 36         | 6          | 0           | 6.308356                | 2.427175 | -0.67519 |
| 37         | 6          | 0           | 8.451229                | -0.10401 | 1.275482 |
| 38         | 7          | 0           | 6.348539                | -0.44941 | 0.364966 |
| 39         | 6          | 0           | 6.281561                | 3.795579 | -0.99755 |
| 40         | 7          | 0           | 5.036443                | 1.948134 | -0.76231 |
| 41         | 6          | 0           | 8.043396                | -1.32522 | 1.711147 |
| 42         | 1          | 0           | 9.37214                 | 0.408882 | 1.506564 |
| 43         | 6          | 0           | 6.73315                 | -1.55304 | 1.133166 |
| 44         | 6          | 0           | 4.963807                | 4.128763 | -1.28108 |
| 45         | 1          | 0           | 7.150746                | 4.433939 | -1.00788 |
| 46         | 6          | 0           | 4.180929                | 2.954589 | -1.16676 |
| 47         | 1          | 0           | 8.560245                | -1.99425 | 2.382563 |

|     |   |   |          |          |          |
|-----|---|---|----------|----------|----------|
| 48  | 6 | 0 | 5.983556 | -2.70892 | 1.322791 |
| 49  | 7 | 0 | 3.761892 | -1.886   | 0.548801 |
| 50  | 7 | 0 | 2.457215 | 0.503481 | -0.59542 |
| 51  | 1 | 0 | 4.57932  | 5.101092 | -1.54668 |
| 52  | 6 | 0 | 2.812156 | 2.780201 | -1.5113  |
| 53  | 6 | 0 | 4.609949 | -2.8812  | 0.991965 |
| 54  | 6 | 0 | 2.486871 | -2.36161 | 0.474949 |
| 55  | 6 | 0 | 2.076372 | 1.6079   | -1.36188 |
| 56  | 6 | 0 | 1.422884 | -0.33672 | -0.6691  |
| 57  | 6 | 0 | 3.820569 | -4.0458  | 1.149122 |
| 58  | 6 | 0 | 2.505468 | -3.71684 | 0.848356 |
| 59  | 6 | 0 | 1.310506 | -1.57331 | 0.126778 |
| 60  | 6 | 0 | 0.785271 | 1.368661 | -1.9749  |
| 61  | 6 | 0 | 0.382621 | 0.13759  | -1.55976 |
| 62  | 1 | 0 | 4.199147 | -5.00936 | 1.45241  |
| 63  | 1 | 0 | 1.63304  | -4.35022 | 0.878026 |
| 64  | 1 | 0 | 0.277629 | 2.036944 | -2.65416 |
| 65  | 1 | 0 | -0.52532 | -0.38552 | -1.8182  |
| 66  | 7 | 0 | 8.608893 | 2.156675 | -0.78408 |
| 67  | 6 | 0 | 14.93088 | 4.254435 | 1.101243 |
| 68  | 6 | 0 | 14.99776 | 5.356547 | 0.233906 |
| 69  | 6 | 0 | 15.44915 | 4.389505 | 2.399096 |
| 70  | 6 | 0 | 15.56959 | 6.558171 | 0.651081 |
| 71  | 1 | 0 | 14.60373 | 5.259131 | -0.77302 |
| 72  | 6 | 0 | 16.02189 | 5.590748 | 2.815952 |
| 73  | 1 | 0 | 15.39308 | 3.544869 | 3.078587 |
| 74  | 6 | 0 | 16.08399 | 6.679007 | 1.943435 |
| 75  | 1 | 0 | 15.61834 | 7.398124 | -0.03583 |
| 76  | 1 | 0 | 16.41409 | 5.67817  | 3.82505  |
| 77  | 1 | 0 | 16.52961 | 7.614557 | 2.268384 |
| 78  | 6 | 0 | 10.80236 | -4.29962 | -2.0617  |
| 79  | 6 | 0 | 10.47966 | -4.51137 | -3.40992 |
| 80  | 6 | 0 | 10.52009 | -5.31459 | -1.1347  |
| 81  | 6 | 0 | 9.878272 | -5.70254 | -3.81726 |
| 82  | 1 | 0 | 10.70221 | -3.73396 | -4.13417 |
| 83  | 6 | 0 | 9.917907 | -6.50533 | -1.54088 |
| 84  | 1 | 0 | 10.774   | -5.15308 | -0.09158 |
| 85  | 6 | 0 | 9.593006 | -6.70158 | -2.88436 |
| 86  | 1 | 0 | 9.634822 | -5.85118 | -4.86522 |
| 87  | 1 | 0 | 9.695614 | -7.2757  | -0.80805 |
| 88  | 1 | 0 | 9.121788 | -7.62674 | -3.2024  |
| 89  | 6 | 0 | 6.661892 | -3.88053 | 1.951305 |
| 90  | 6 | 0 | 7.781493 | -4.46119 | 1.333085 |
| 91  | 6 | 0 | 6.197118 | -4.41887 | 3.161935 |
| 92  | 6 | 0 | 8.410323 | -5.56294 | 1.911968 |
| 93  | 1 | 0 | 8.148375 | -4.05131 | 0.397168 |
| 94  | 6 | 0 | 6.838648 | -5.51038 | 3.744903 |
| 95  | 1 | 0 | 5.33715  | -3.96736 | 3.645966 |
| 96  | 6 | 0 | 7.944538 | -6.08841 | 3.118379 |
| 97  | 1 | 0 | 9.264128 | -6.01352 | 1.417138 |
| 98  | 1 | 0 | 6.475828 | -5.9076  | 4.68822  |
| 99  | 1 | 0 | 8.440815 | -6.9431  | 3.568561 |
| 100 | 6 | 0 | 2.117131 | 3.961673 | -2.09895 |
| 101 | 6 | 0 | 2.587811 | 4.573278 | -3.2721  |
| 102 | 6 | 0 | 0.969598 | 4.479099 | -1.47475 |
| 103 | 6 | 0 | 1.925454 | 5.674892 | -3.81114 |

|     |   |   |          |          |          |
|-----|---|---|----------|----------|----------|
| 104 | 1 | 0 | 3.467467 | 4.169888 | -3.7631  |
| 105 | 6 | 0 | 0.320145 | 5.591314 | -2.00816 |
| 106 | 1 | 0 | 0.597579 | 4.010681 | -0.56879 |
| 107 | 6 | 0 | 0.792855 | 6.190105 | -3.17721 |
| 108 | 1 | 0 | 2.292826 | 6.129032 | -4.7266  |
| 109 | 1 | 0 | -0.55334 | 5.990952 | -1.5044  |
| 110 | 1 | 0 | 0.281058 | 7.052895 | -3.59334 |
| 111 | 1 | 0 | 13.09489 | -1.10867 | -0.50698 |
| 112 | 1 | 0 | 12.59891 | 1.024193 | -0.32899 |
| 113 | 1 | 0 | 4.766501 | 0.986868 | -0.58736 |
| 114 | 1 | 0 | 4.036466 | -0.93104 | 0.348038 |
| 115 | 6 | 0 | -1.04334 | -1.45559 | 0.493626 |
| 116 | 6 | 0 | -2.09483 | -2.27018 | 0.010915 |
| 117 | 6 | 0 | -1.2024  | -0.12835 | 0.990748 |
| 118 | 6 | 0 | -1.97881 | -3.63034 | -0.39838 |
| 119 | 7 | 0 | -3.39444 | -1.88946 | -0.21187 |
| 120 | 6 | 0 | -0.15013 | 0.604533 | 1.678626 |
| 121 | 7 | 0 | -2.32029 | 0.630336 | 0.843421 |
| 122 | 6 | 0 | -3.20698 | -4.03705 | -0.8606  |
| 123 | 1 | 0 | -1.06594 | -4.20165 | -0.33627 |
| 124 | 6 | 0 | -4.10813 | -2.93099 | -0.75844 |
| 125 | 1 | 0 | -3.76896 | -0.96464 | -0.03441 |
| 126 | 6 | 0 | -0.63121 | 1.856568 | 1.876404 |
| 127 | 1 | 0 | 0.818733 | 0.22315  | 1.960529 |
| 128 | 6 | 0 | -1.99057 | 1.86281  | 1.351945 |
| 129 | 1 | 0 | -3.47403 | -5.00615 | -1.2529  |
| 130 | 6 | 0 | -5.4445  | -2.88698 | -1.20033 |
| 131 | 1 | 0 | -0.12609 | 2.689042 | 2.342051 |
| 132 | 6 | 0 | -2.8166  | 3.002859 | 1.345309 |
| 133 | 6 | 0 | -6.27332 | -1.7533  | -1.18595 |
| 134 | 6 | 0 | -6.01557 | -4.17463 | -1.70324 |
| 135 | 6 | 0 | -4.15564 | 3.041288 | 0.920606 |
| 136 | 6 | 0 | -2.23818 | 4.299232 | 1.816396 |
| 137 | 6 | 0 | -7.63219 | -1.74158 | -1.71423 |
| 138 | 7 | 0 | -5.95332 | -0.53025 | -0.64336 |
| 139 | 6 | 0 | -6.34868 | -4.35231 | -3.05351 |
| 140 | 6 | 0 | -6.23971 | -5.23211 | -0.80916 |
| 141 | 6 | 0 | -5.05785 | 4.148301 | 1.022171 |
| 142 | 7 | 0 | -4.87995 | 1.990601 | 0.401867 |
| 143 | 6 | 0 | -2.03542 | 5.345432 | 0.903408 |
| 144 | 6 | 0 | -1.88603 | 4.499655 | 3.158784 |
| 145 | 6 | 0 | -8.12266 | -0.50018 | -1.48169 |
| 146 | 1 | 0 | -8.13007 | -2.56433 | -2.20422 |
| 147 | 6 | 0 | -7.07596 | 0.22135  | -0.76984 |
| 148 | 6 | 0 | -6.90696 | -5.55277 | -3.49397 |
| 149 | 1 | 0 | -6.17062 | -3.54114 | -3.75259 |
| 150 | 6 | 0 | -6.80134 | -6.43095 | -1.24738 |
| 151 | 1 | 0 | -5.97113 | -5.09825 | 0.23422  |
| 152 | 6 | 0 | -6.29381 | 3.732891 | 0.593185 |
| 153 | 1 | 0 | -4.78517 | 5.123991 | 1.39373  |
| 154 | 6 | 0 | -6.1832  | 2.365902 | 0.199954 |
| 155 | 1 | 0 | -4.50902 | 1.063047 | 0.231377 |
| 156 | 6 | 0 | -1.47996 | 6.555962 | 1.317783 |
| 157 | 1 | 0 | -2.31674 | 5.195462 | -0.13456 |
| 158 | 6 | 0 | -1.331   | 5.710525 | 3.574042 |
| 159 | 1 | 0 | -2.0491  | 3.698129 | 3.872464 |

|     |   |   |          |          |          |
|-----|---|---|----------|----------|----------|
| 160 | 1 | 0 | -9.09279 | -0.11751 | -1.7568  |
| 161 | 6 | 0 | -7.23999 | 1.541571 | -0.25359 |
| 162 | 6 | 0 | -7.13866 | -6.59348 | -2.59229 |
| 163 | 1 | 0 | -7.16041 | -5.67514 | -4.54292 |
| 164 | 1 | 0 | -6.98343 | -7.23265 | -0.53767 |
| 165 | 1 | 0 | -7.20881 | 4.301363 | 0.541013 |
| 166 | 6 | 0 | -1.12327 | 6.740753 | 2.654887 |
| 167 | 1 | 0 | -1.32176 | 7.352615 | 0.596499 |
| 168 | 1 | 0 | -1.06377 | 5.849924 | 4.617447 |
| 169 | 7 | 0 | -8.47269 | 2.167705 | -0.22931 |
| 170 | 1 | 0 | -7.57853 | -7.52493 | -2.93578 |
| 171 | 1 | 0 | -0.68884 | 7.681748 | 2.97877  |
| 172 | 6 | 0 | -9.58216 | 1.607825 | 0.160761 |
| 173 | 6 | 0 | -9.66011 | 0.316268 | 0.876078 |
| 174 | 6 | 0 | -10.7784 | 2.415658 | -0.0504  |
| 175 | 6 | 0 | -8.63677 | -0.15485 | 1.79265  |
| 176 | 7 | 0 | -10.6478 | -0.55773 | 0.717621 |
| 177 | 6 | 0 | -10.8293 | 3.811666 | -0.22148 |
| 178 | 7 | 0 | -12.053  | 1.940578 | -0.0849  |
| 179 | 6 | 0 | -9.01111 | -1.41304 | 2.147619 |
| 180 | 1 | 0 | -7.75979 | 0.392875 | 2.103629 |
| 181 | 6 | 0 | -10.257  | -1.68406 | 1.454751 |
| 182 | 6 | 0 | -12.1665 | 4.166802 | -0.33611 |
| 183 | 1 | 0 | -9.96299 | 4.454071 | -0.22822 |
| 184 | 6 | 0 | -12.9397 | 2.981328 | -0.27921 |
| 185 | 1 | 0 | -12.3257 | 0.96483  | -0.02992 |
| 186 | 1 | 0 | -8.507   | -2.08765 | 2.823326 |
| 187 | 6 | 0 | -10.9309 | -2.89699 | 1.452955 |
| 188 | 1 | 0 | -12.57   | 5.161312 | -0.44556 |
| 189 | 6 | 0 | -14.3473 | 2.843431 | -0.42256 |
| 190 | 6 | 0 | -12.2258 | -3.11502 | 0.88738  |
| 191 | 6 | 0 | -10.2671 | -4.08618 | 2.055293 |
| 192 | 6 | 0 | -15.0553 | 1.644017 | -0.4396  |
| 193 | 6 | 0 | -15.1164 | 4.111494 | -0.60198 |
| 194 | 7 | 0 | -13.0851 | -2.12211 | 0.478698 |
| 195 | 6 | 0 | -12.8787 | -4.34707 | 0.649247 |
| 196 | 6 | 0 | -9.00369 | -4.50257 | 1.602692 |
| 197 | 6 | 0 | -10.9001 | -4.81752 | 3.074227 |
| 198 | 7 | 0 | -14.493  | 0.375213 | -0.26995 |
| 199 | 6 | 0 | -16.4684 | 1.525185 | -0.75543 |
| 200 | 6 | 0 | -14.9189 | 4.919579 | -1.73179 |
| 201 | 6 | 0 | -16.0573 | 4.506178 | 0.360642 |
| 202 | 6 | 0 | -14.2403 | -2.67312 | 0.008387 |
| 203 | 1 | 0 | -12.8736 | -1.13156 | 0.486224 |
| 204 | 6 | 0 | -14.1276 | -4.06801 | 0.102634 |
| 205 | 1 | 0 | -12.4533 | -5.31749 | 0.853661 |
| 206 | 6 | 0 | -8.39181 | -5.62322 | 2.162884 |
| 207 | 1 | 0 | -8.51625 | -3.95514 | 0.802072 |
| 208 | 6 | 0 | -10.2783 | -5.92853 | 3.640166 |
| 209 | 1 | 0 | -11.8769 | -4.4999  | 3.424431 |
| 210 | 6 | 0 | -15.5001 | -0.47405 | -0.48366 |
| 211 | 6 | 0 | -16.7443 | 0.192753 | -0.78959 |
| 212 | 1 | 0 | -17.1385 | 2.348374 | -0.95373 |
| 213 | 6 | 0 | -15.6491 | 6.096233 | -1.89504 |
| 214 | 1 | 0 | -14.199  | 4.612718 | -2.48384 |
| 215 | 6 | 0 | -16.7805 | 5.687517 | 0.199347 |

|     |   |   |          |          |          |
|-----|---|---|----------|----------|----------|
| 216 | 1 | 0 | -16.2132 | 3.881264 | 1.234115 |
| 217 | 6 | 0 | -15.4297 | -1.95284 | -0.45998 |
| 218 | 1 | 0 | -14.9019 | -4.75603 | -0.19992 |
| 219 | 6 | 0 | -9.02259 | -6.33555 | 3.184128 |
| 220 | 1 | 0 | -7.42193 | -5.94359 | 1.797213 |
| 221 | 1 | 0 | -10.7736 | -6.47553 | 4.436787 |
| 222 | 1 | 0 | -17.6735 | -0.31185 | -1.0068  |
| 223 | 6 | 0 | -16.5792 | 6.48475  | -0.92885 |
| 224 | 1 | 0 | -15.4938 | 6.707038 | -2.77938 |
| 225 | 1 | 0 | -17.5014 | 5.984104 | 0.955407 |
| 226 | 1 | 0 | -8.54    | -7.20501 | 3.6207   |
| 227 | 1 | 0 | -17.1454 | 7.402634 | -1.0557  |
| 228 | 7 | 0 | 0.182545 | -2.09168 | 0.524365 |
| 229 | 8 | 0 | -16.4127 | -2.60556 | -0.82212 |

---

**Table S7** Cartesian coordinates for the optimized structure of **1<sup>•+</sup>**.Stoichiometry: C<sub>32</sub>H<sub>23</sub>N<sub>5</sub>, full point group: C1, charge: 1, multiplicity: 1.

Total energy: -1506.94400346 a.u., No. of imaginary freq: 0.

| Center No. | Atomic No. | Atomic type | Coordinates (Angstroms) |           |           |
|------------|------------|-------------|-------------------------|-----------|-----------|
|            |            |             | X                       | Y         | Z         |
| 1          | 6          | 0           | -3.476628               | 2.341656  | 0.347143  |
| 2          | 6          | 0           | -2.482155               | 3.300187  | 0.374394  |
| 3          | 6          | 0           | -1.248321               | 2.65309   | 0.106603  |
| 4          | 7          | 0           | -1.51755                | 1.319669  | -0.066595 |
| 5          | 6          | 0           | -2.866139               | 1.089172  | 0.064945  |
| 6          | 6          | 0           | -2.533792               | -3.638941 | -0.263749 |
| 7          | 6          | 0           | -3.515934               | -2.703354 | -0.280999 |
| 8          | 6          | 0           | -2.849684               | -1.41094  | -0.117383 |
| 9          | 7          | 0           | -1.492528               | -1.563028 | -0.042162 |
| 10         | 6          | 0           | -1.280898               | -2.91097  | -0.110797 |
| 11         | 6          | 0           | -3.51937                | -0.172819 | -0.029203 |
| 12         | 6          | 0           | 3.47648                 | -2.708029 | 0.249718  |
| 13         | 6          | 0           | 2.474195                | -3.651419 | 0.221758  |
| 14         | 6          | 0           | 1.231477                | -2.962805 | 0.077855  |
| 15         | 7          | 0           | 1.513833                | -1.623215 | 0.020833  |
| 16         | 6          | 0           | 2.868543                | -1.420669 | 0.102485  |
| 17         | 6          | 0           | -0.038529               | -3.544868 | -0.017639 |
| 18         | 6          | 0           | 2.546966                | 3.287203  | -0.407708 |
| 19         | 6          | 0           | 3.51515                 | 2.329528  | -0.372485 |
| 20         | 6          | 0           | 2.841797                | 1.077011  | -0.089857 |
| 21         | 7          | 0           | 1.482097                | 1.271259  | 0.028795  |
| 22         | 6          | 0           | 1.298029                | 2.603292  | -0.138481 |
| 23         | 6          | 0           | 0.03627                 | 3.273056  | -0.012799 |
| 24         | 6          | 0           | 3.511354                | -0.162484 | 0.01774   |
| 25         | 1          | 0           | -4.52867                | 2.489021  | 0.534837  |
| 26         | 1          | 0           | -2.626021               | 4.347329  | 0.59946   |
| 27         | 1          | 0           | -2.628765               | -4.712957 | -0.355589 |
| 28         | 1          | 0           | -4.577766               | -2.855506 | -0.402951 |
| 29         | 1          | 0           | 4.535413                | -2.879177 | 0.365542  |
| 30         | 1          | 0           | 2.575762                | -4.724862 | 0.29997   |
| 31         | 1          | 0           | 2.696156                | 4.332857  | -0.641913 |
| 32         | 1          | 0           | 4.571596                | 2.454506  | -0.556483 |
| 33         | 1          | 0           | 0.828019                | -0.878317 | -0.031984 |
| 34         | 1          | 0           | -0.830601               | 0.584138  | -0.195174 |
| 35         | 7          | 0           | 0.051737                | 4.625778  | -0.002047 |
| 36         | 1          | 0           | -0.795701               | 5.168668  | -0.041484 |
| 37         | 1          | 0           | 0.918676                | 5.136216  | 0.047801  |
| 38         | 6          | 0           | -5.004907               | -0.156542 | -0.007242 |
| 39         | 6          | 0           | -5.711614               | -0.848378 | 0.993065  |
| 40         | 6          | 0           | -5.725072               | 0.554514  | -0.984676 |
| 41         | 6          | 0           | -7.106177               | -0.823616 | 1.016902  |
| 42         | 1          | 0           | -5.162883               | -1.386299 | 1.759895  |
| 43         | 6          | 0           | -7.119983               | 0.560229  | -0.969087 |
| 44         | 1          | 0           | -5.187608               | 1.080242  | -1.768081 |
| 45         | 6          | 0           | -7.813494               | -0.124436 | 0.033789  |
| 46         | 1          | 0           | -7.63974                | -1.34894  | 1.802905  |
| 47         | 1          | 0           | -7.664506               | 1.096483  | -1.740084 |



|    |   |   |           |           |           |
|----|---|---|-----------|-----------|-----------|
| 48 | 1 | 0 | -8.898887 | -0.113353 | 0.049041  |
| 49 | 6 | 0 | 4.998624  | -0.161469 | 0.028566  |
| 50 | 6 | 0 | 5.69603   | 0.531059  | 1.03446   |
| 51 | 6 | 0 | 5.726238  | -0.846461 | -0.960851 |
| 52 | 6 | 0 | 7.090996  | 0.527075  | 1.055819  |
| 53 | 1 | 0 | 5.139582  | 1.053816  | 1.806261  |
| 54 | 6 | 0 | 7.121308  | -0.831369 | -0.947362 |
| 55 | 1 | 0 | 5.195498  | -1.368068 | -1.751499 |
| 56 | 6 | 0 | 7.806508  | -0.149939 | 0.063432  |
| 57 | 1 | 0 | 7.618192  | 1.051528  | 1.846698  |
| 58 | 1 | 0 | 7.672264  | -1.349151 | -1.726359 |
| 59 | 1 | 0 | 8.891974  | -0.145932 | 0.07699   |
| 60 | 1 | 0 | -0.048722 | -4.630866 | -0.019696 |

## References

- 1 K. Yamashita, K. Kataoka, S. Takeuchi and K. Sugiura, *J. Org. Chem.*, 2016, **81**, 11176–11184.
- 2 K. Yamashita, D. Hirano, M. S. Asano and K. Sugiura, *Chem. Lett.*, 2014, **43**, 1049–1051.
- 3 G. M. Sheldrick, *Acta Crystallogr. Sect. A Found. Crystallogr.*, 2007, **64**, 112–122.
- 4 G. M. Sheldrick, *Acta Crystallogr. Sect. C Struct. Chem.*, 2015, **71**, 3–8.
- 5 M. J. Frisch, G. W. Trucks, H. B. Schlegel, G. E. Scuseria, M. A. Robb, J. R. Cheeseman, G. Scalmani, V. Barone, G. A. Petersson, H. Nakatsuji, X. Li, M. Caricato, A. V. Marenich, J. Bloino, B. G. Janesko, R. Gomperts, B. Mennucci, H. P. Hratchian, J. V. Ortiz, A. F. Izmaylov, J. L. Sonnenberg, D. Williams-Young, F. Ding, F. Lipparini, F. Egidi, J. Goings, B. Peng, A. Petrone, T. Henderson, D. Ranasinghe, V. G. Zakrzewski, J. Gao, N. Rega, G. Zheng, W. Liang, M. Hada, M. Ehara, K. Toyota, R. Fukuda, J. Hasegawa, M. Ishida, T. Nakajima, Y. Honda, O. Kitao, H. Nakai, T. Vreven, K. Throssell, J. Montgomery, J. A., J. E. Peralta, F. Ogliaro, M. J. Bearpark, J. J. Heyd, E. N. Brothers, K. N. Kudin, V. N. Staroverov, T. A. Keith, R. Kobayashi, J. Normand, K. Raghavachari, A. P. Rendell, J. C. Burant, S. S. Iyengar, J. Tomasi, M. Cossi, J. M. Millam, M. Klene, C. Adamo, R. Cammi, J. W. Ochterski, R. L. Martin, K. Morokuma, O. Farkas, J. B. Foresman and D. J. Fox, *Gaussian 16, Rev. C.01, Gaussian, Inc., Wallingford CT*, 2016.

2(0)

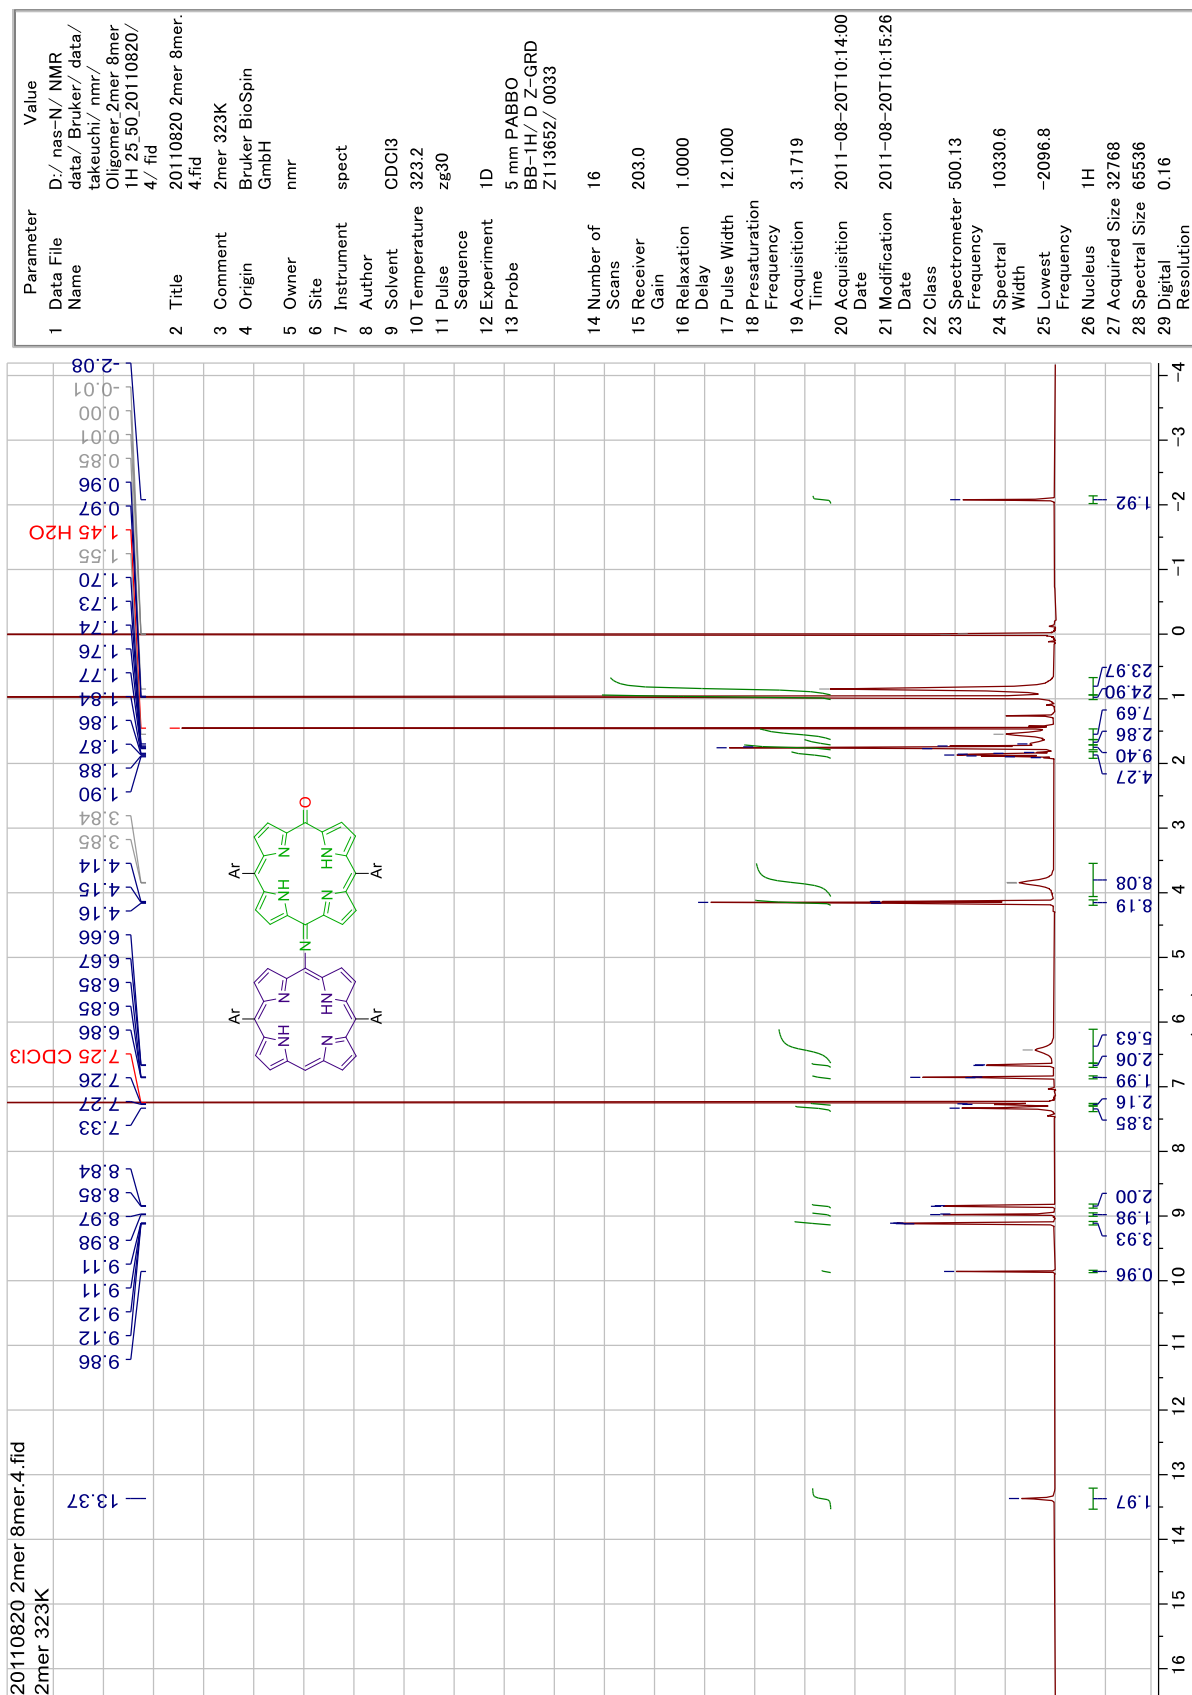

$^{13}\text{C}$  NMR (125 MHz, tetrachloroethane- $d_4$ , 373 K)

| Parameter             | Value                                                                              |
|-----------------------|------------------------------------------------------------------------------------|
| 1 Data File Name      | Y:/ TMU-NMR/<br>Bruker/data/<br>takeuch/ nmr/<br>ST042.2mer.373K<br>_data/ 11/ fid |
| 2 Title               | ST042.11.fid                                                                       |
| 3 Comment             | 373K 13C-2                                                                         |
| 4 Origin              | Bruker BioSpin<br>GmbH                                                             |
| 5 Owner               | nmr                                                                                |
| 6 Site                | spect                                                                              |
| 7 Instrument          | CD2C12                                                                             |
| 8 Author              | 373.2                                                                              |
| 9 Solvent             | zpgg30                                                                             |
| 10 Temperature        | 1D                                                                                 |
| 11 Pulse Sequence     | 5 mm PABBO<br>BB-1H/ D Z-<br>GRD Z113652/<br>0033                                  |
| 12 Experiment         |                                                                                    |
| 13 Probe              |                                                                                    |
| 14 Number of Scans    | 4102                                                                               |
| 15 Receiver Gain      | 203.0                                                                              |
| 16 Relaxation Delay   | 2.0000                                                                             |
| 17 Pulse Width        | 9.0000                                                                             |
| 18 Presaturation      |                                                                                    |
| 19 Acquisition Time   | 1.1011                                                                             |
| 20 Acquisition Date   | 2010-06-20T13:0<br>3:00                                                            |
| 21 Modification Date  | 2010-06-20T13:4<br>7:35                                                            |
| 22 Class              |                                                                                    |
| 23 Spectrometer       | 125.77                                                                             |
| 24 Spectral Width     | 29761.9                                                                            |
| 25 Lowest             | -2257.8                                                                            |
| 26 Nucleus            | 13C                                                                                |
| 27 Acquired Size      | 32768                                                                              |
| 28 Spectral Size      | 65536                                                                              |
| 29 Digital Resolution | 0.45                                                                               |

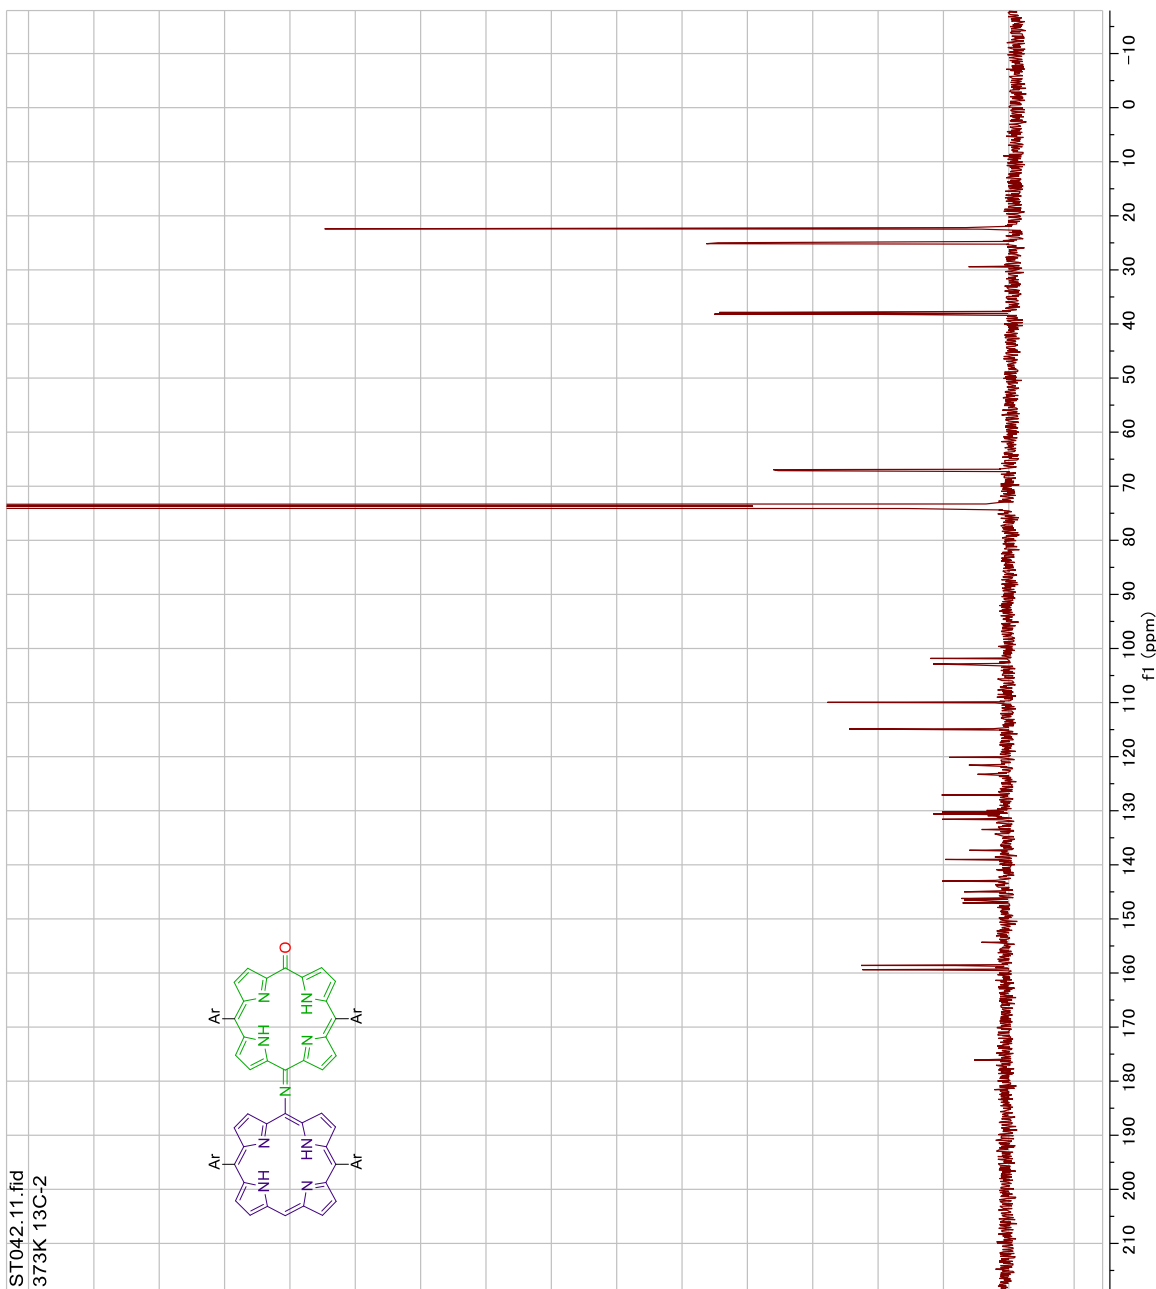

HSQC NMR (tetrachloroethane-*d*<sub>4</sub>, 373 K)

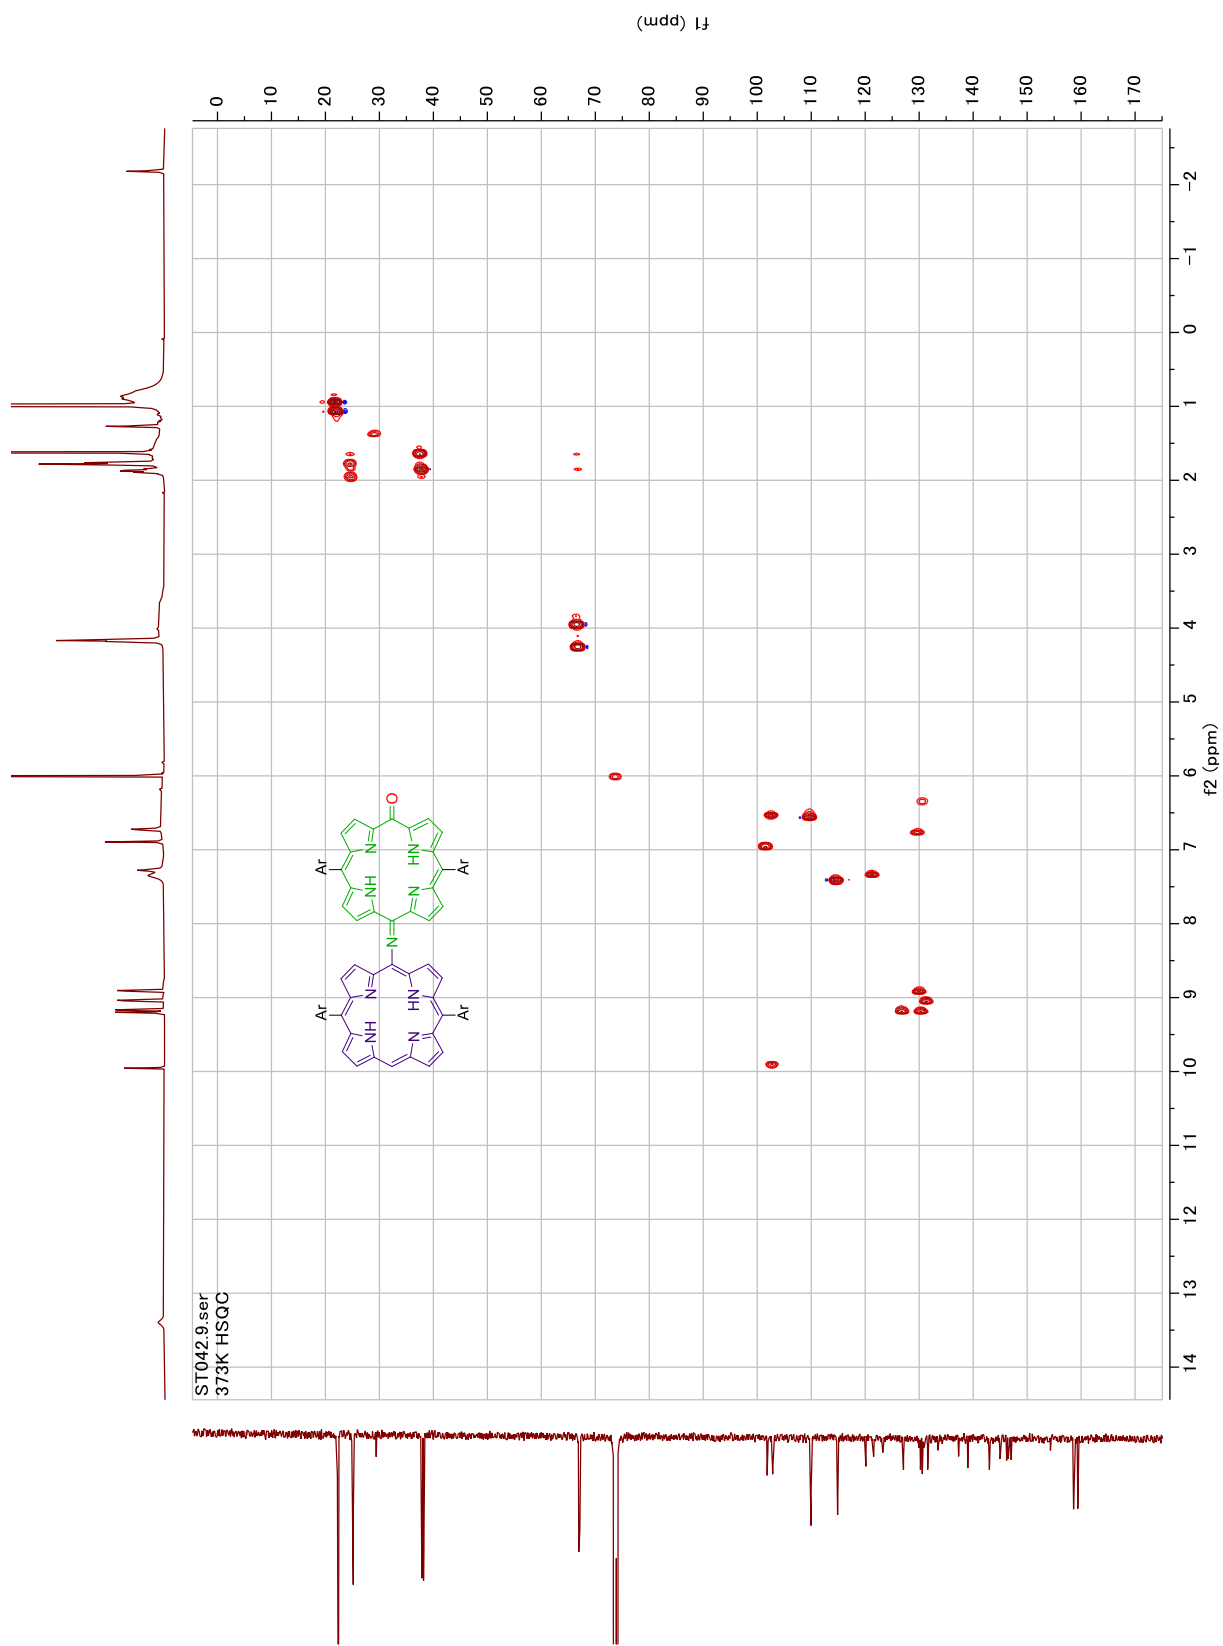

2(1)

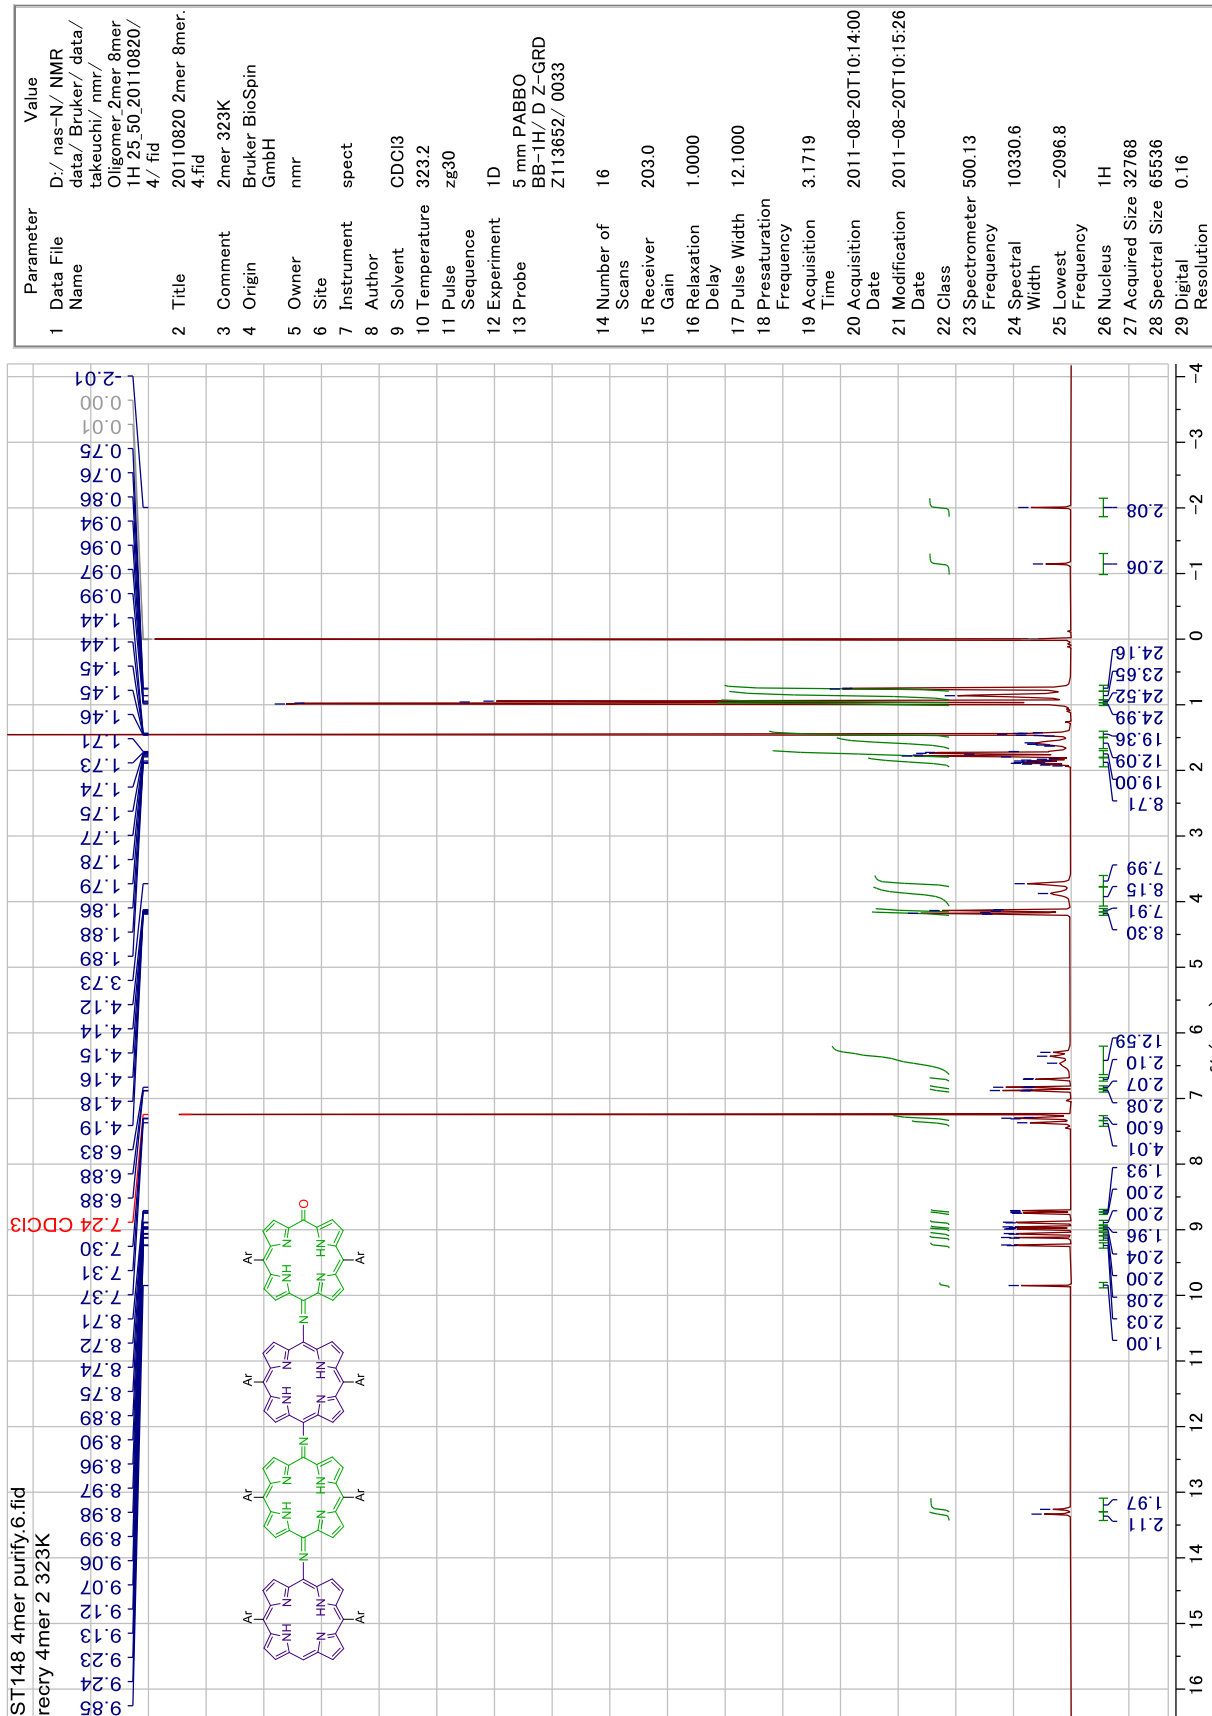

2(2)

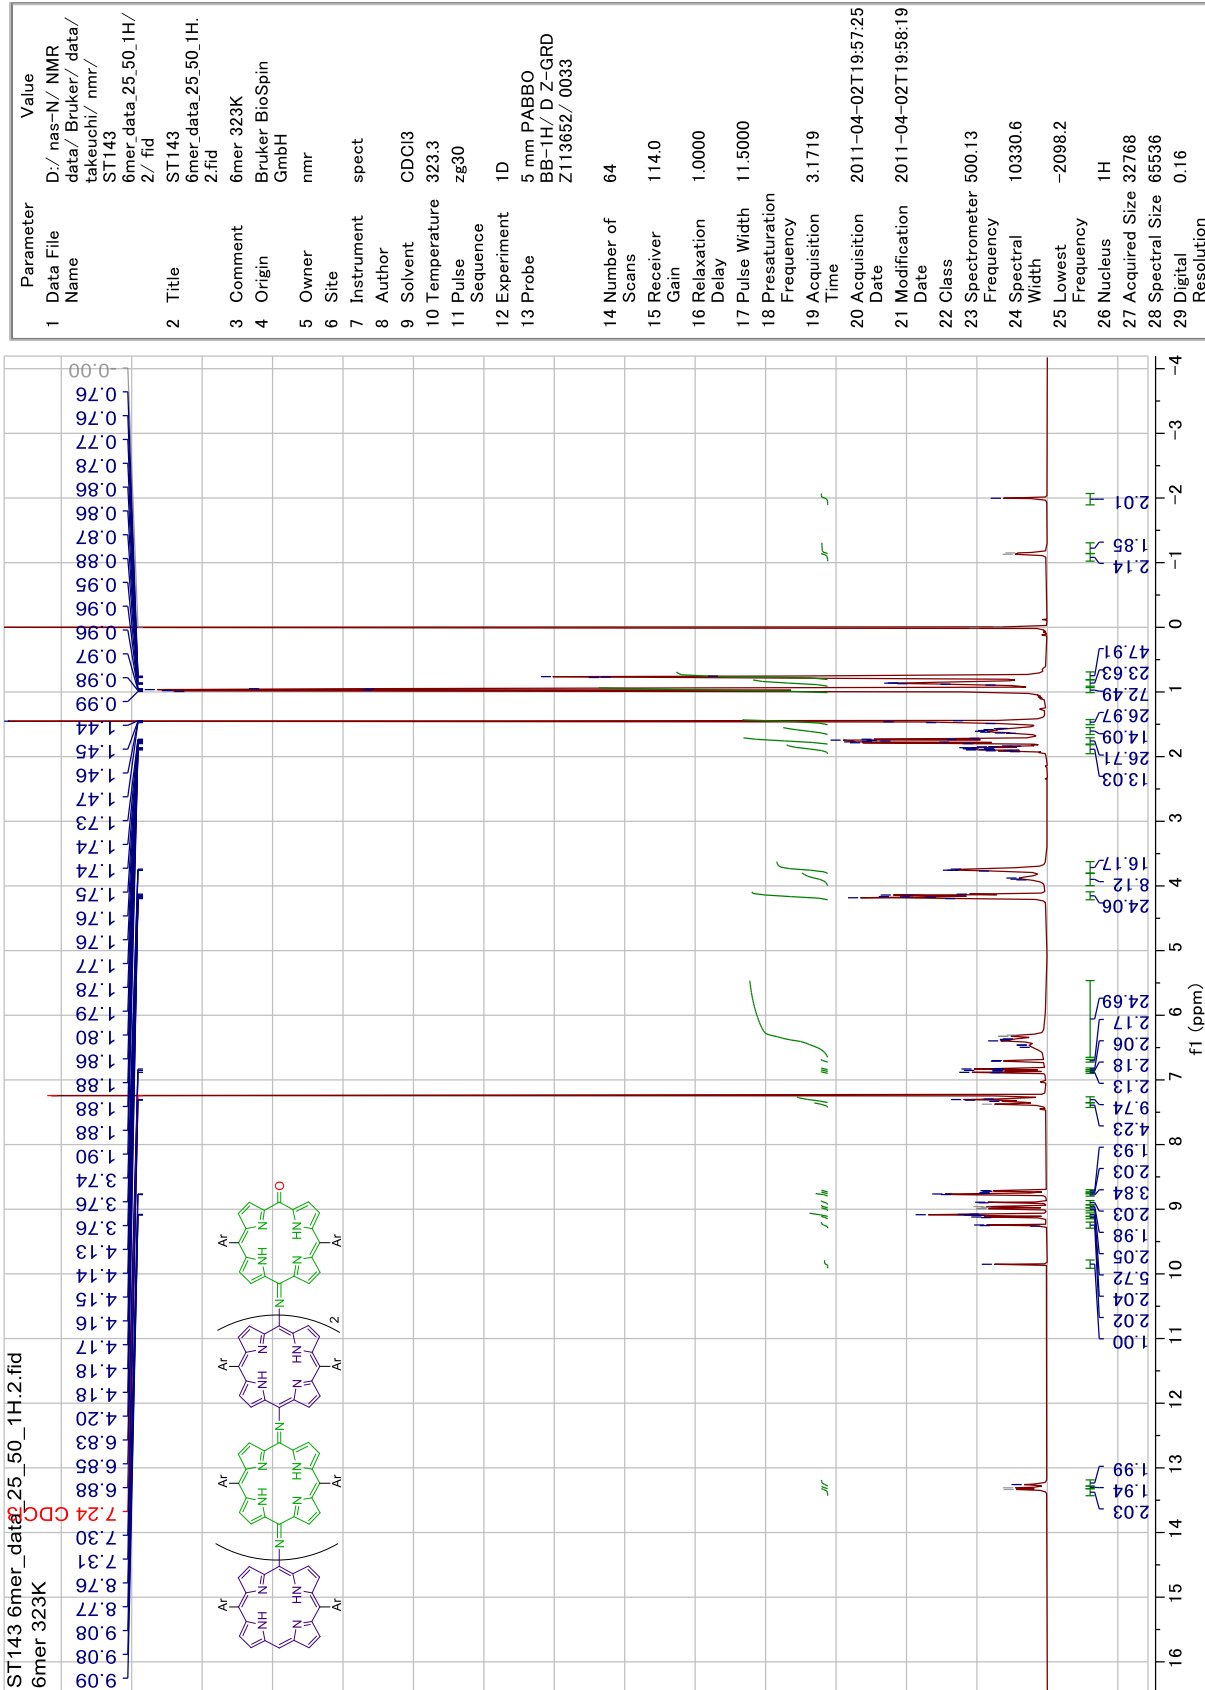

2(3)

| Parameter                  | Value                                                                                         |
|----------------------------|-----------------------------------------------------------------------------------------------|
| 1 Data File Name           | D:\nas-N\ NMR data\ Bruker\ data\ takeuchi\ nmr\ Oligomer 2mer 8mer 1H 25.50_20110820\ 3\ fid |
| 2 Title                    | 20110820 2mer 8mer. 3.fid                                                                     |
| 3 Comment                  | 8mer 323K                                                                                     |
| 4 Origin                   | Bruker BioSpin GmbH                                                                           |
| 5 Owner                    | nmr                                                                                           |
| 6 Site                     | spect                                                                                         |
| 7 Instrument               | spect                                                                                         |
| 8 Author                   | CDCI3                                                                                         |
| 9 Solvent                  | CDCl3                                                                                         |
| 10 Temperature             | 323.3                                                                                         |
| 11 Pulse Sequence          | zg30                                                                                          |
| 12 Experiment              | 1D                                                                                            |
| 13 Probe                   | 5 mm PABBO BB-1H/ D Z-GRD Z113652/ 0033                                                       |
| 14 Number of Scans         | 16                                                                                            |
| 15 Receiver Gain           | 203.0                                                                                         |
| 16 Relaxation Delay        | 1.0000                                                                                        |
| 17 Pulse Width             | 12.1000                                                                                       |
| 18 Presaturation Frequency |                                                                                               |
| 19 Acquisition Time        | 3.1719                                                                                        |
| 20 Acquisition Date        | 2011-08-20T09:56:00                                                                           |
| 21 Modification Date       | 2011-08-20T09:56:55                                                                           |
| 22 Class                   |                                                                                               |
| 23 Spectrometer Frequency  | 500.13                                                                                        |
| 24 Spectral Width          | 10330.6                                                                                       |
| 25 Lowest Frequency        | -2096.2                                                                                       |
| 26 Nucleus                 | <sup>1</sup> H                                                                                |
| 27 Acquired Size           | 32768                                                                                         |
| 28 Spectral Size           | 65536                                                                                         |
| 29 Digital Resolution      | 0.16                                                                                          |

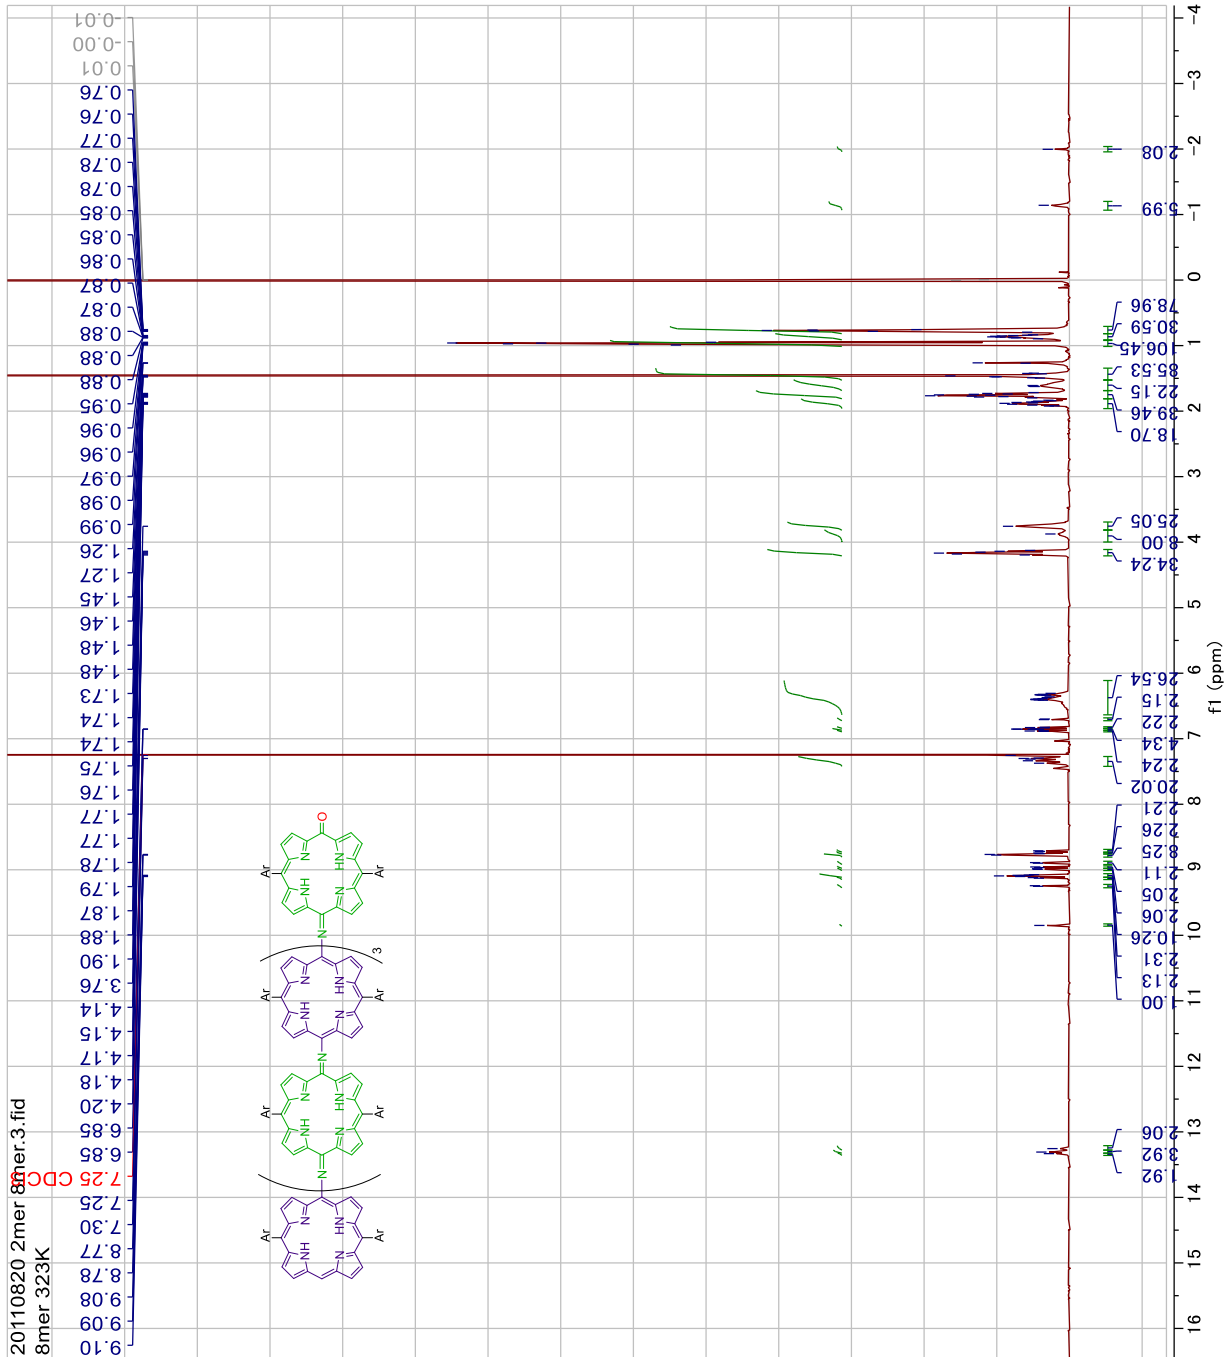



# Ni-2(0)

| Parameter                  | Value                                                                             |
|----------------------------|-----------------------------------------------------------------------------------|
| 1 Data File Name           | D:\nas-N\ NMR data\Bruker\data\takeuchi\ nmr\ ST120 Ni 2mer data_VT_2DNMR\ 5\ fid |
| 2 Title                    | ST120 Ni 2mer data. 5.fid                                                         |
| 3 Comment                  | Ni 2mer 273K 0                                                                    |
| 4 Origin                   | Bruker BioSpin GmbH                                                               |
| 5 Owner                    | nmr                                                                               |
| 6 Site                     | spect                                                                             |
| 7 Instrument               | spec                                                                              |
| 8 Author                   | CDCI3                                                                             |
| 9 Solvent                  | CDCI3                                                                             |
| 10 Temperature             | 272.7                                                                             |
| 11 Pulse Sequence          | zg30                                                                              |
| 12 Experiment ID           | 1D                                                                                |
| 13 Probe                   | 5 mm PABBO BB-1H/ D Z-GRD Z113652/ 0033                                           |
| 14 Number of Scans         | 16                                                                                |
| 15 Receiver Gain           | 128.0                                                                             |
| 16 Relaxation Delay        | 1.0000                                                                            |
| 17 Pulse Width             | 12.0000                                                                           |
| 18 Presaturation Frequency |                                                                                   |
| 19 Acquisition Time        | 3.1719                                                                            |
| 20 Acquisition Date        | 2011-01-22T21:46:00                                                               |
| 21 Modification Date       | 2011-01-22T21:46:37                                                               |
| 22 Class                   |                                                                                   |
| 23 Spectrometer            | 500.13                                                                            |
| 24 Spectral Width          | 10330.6                                                                           |
| 25 Lowest Frequency        | -2085.4                                                                           |
| 26 Nucleus                 | <sup>1</sup> H                                                                    |
| 27 Acquired Size           | 32768                                                                             |
| 28 Spectral Size           | 65536                                                                             |
| 29 Digital Resolution      | 0.16                                                                              |

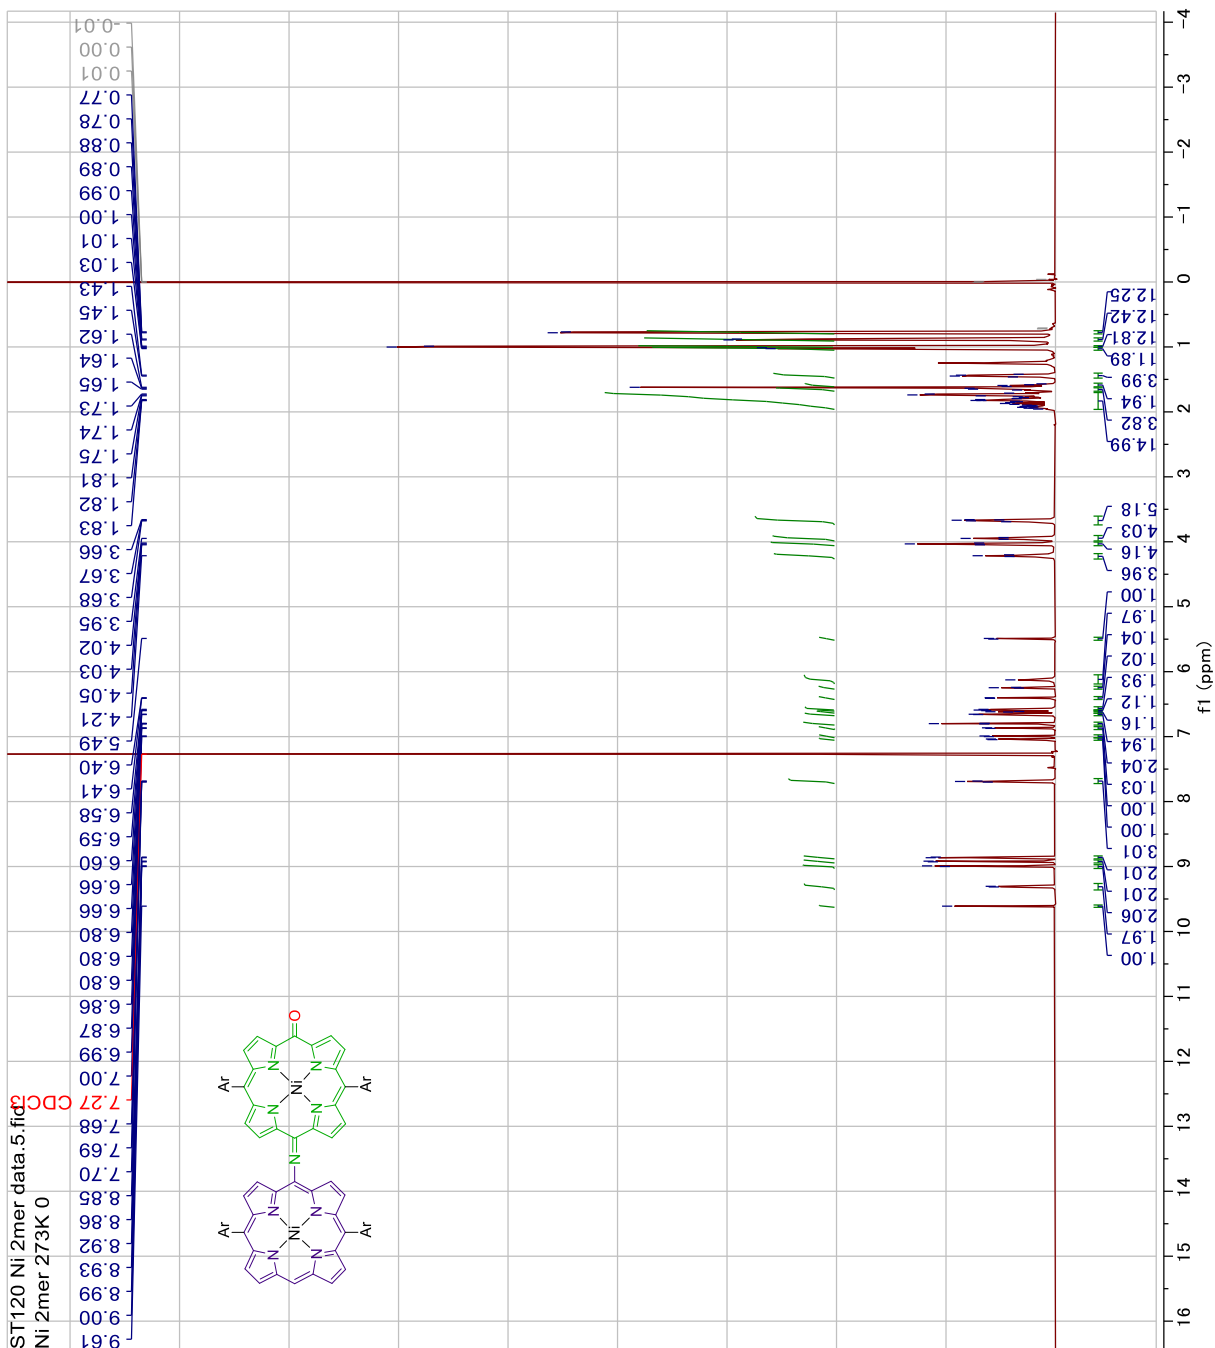

<sup>13</sup>C NMR (125 MHz, CDCl<sub>3</sub>, 273 K)

| Parameter                  | Value                                                                           |
|----------------------------|---------------------------------------------------------------------------------|
| 1 Data File Name           | D:\nas-N/ NMR data\Bruker\data\takeuchi/nmr/ST120 Ni 2mer\data_VT_2DNMR/15/ fid |
| 2 Title                    | ST120 Ni 2mer data.15.fid                                                       |
| 3 Comment                  | Ni 2mer 273K 0 13C                                                              |
| 4 Origin                   | Bruker BioSpin GmbH                                                             |
| 5 Owner                    | nmr                                                                             |
| 6 Site                     |                                                                                 |
| 7 Instrument               | spect                                                                           |
| 8 Author                   |                                                                                 |
| 9 Solvent                  | CDCl <sub>3</sub>                                                               |
| 10 Temperature             | 274.4                                                                           |
| 11 Pulse Sequence          | zgpg30                                                                          |
| 12 Experiment 1D           |                                                                                 |
| 13 Probe                   | 5 mm PABBO BB-1H/ D Z-GRD Z113652/ 0033                                         |
| 14 Number of Scans         | 9253                                                                            |
| 15 Receiver Gain           | 203.0                                                                           |
| 16 Relaxation Delay        | 2.0000                                                                          |
| 17 Pulse Width             | 9.0000                                                                          |
| 18 Presaturation Frequency |                                                                                 |
| 19 Acquisition Time        | 1.1011                                                                          |
| 20 Acquisition Date        | 2011-01-23T13:28:00                                                             |
| 21 Modification Date       | 2011-01-23T13:39:22                                                             |
| 22 Class                   |                                                                                 |
| 23 Spectrometer Frequency  | 125.77                                                                          |
| 24 Spectral Width          | 29761.9                                                                         |
| 25 Lowest Frequency        | -2318.8                                                                         |
| 26 Nucleus                 | <sup>13</sup> C                                                                 |
| 27 Acquired Size           | 32768                                                                           |
| 28 Spectral Size           | 65536                                                                           |
| 29 Digital Resolution      | 0.45                                                                            |

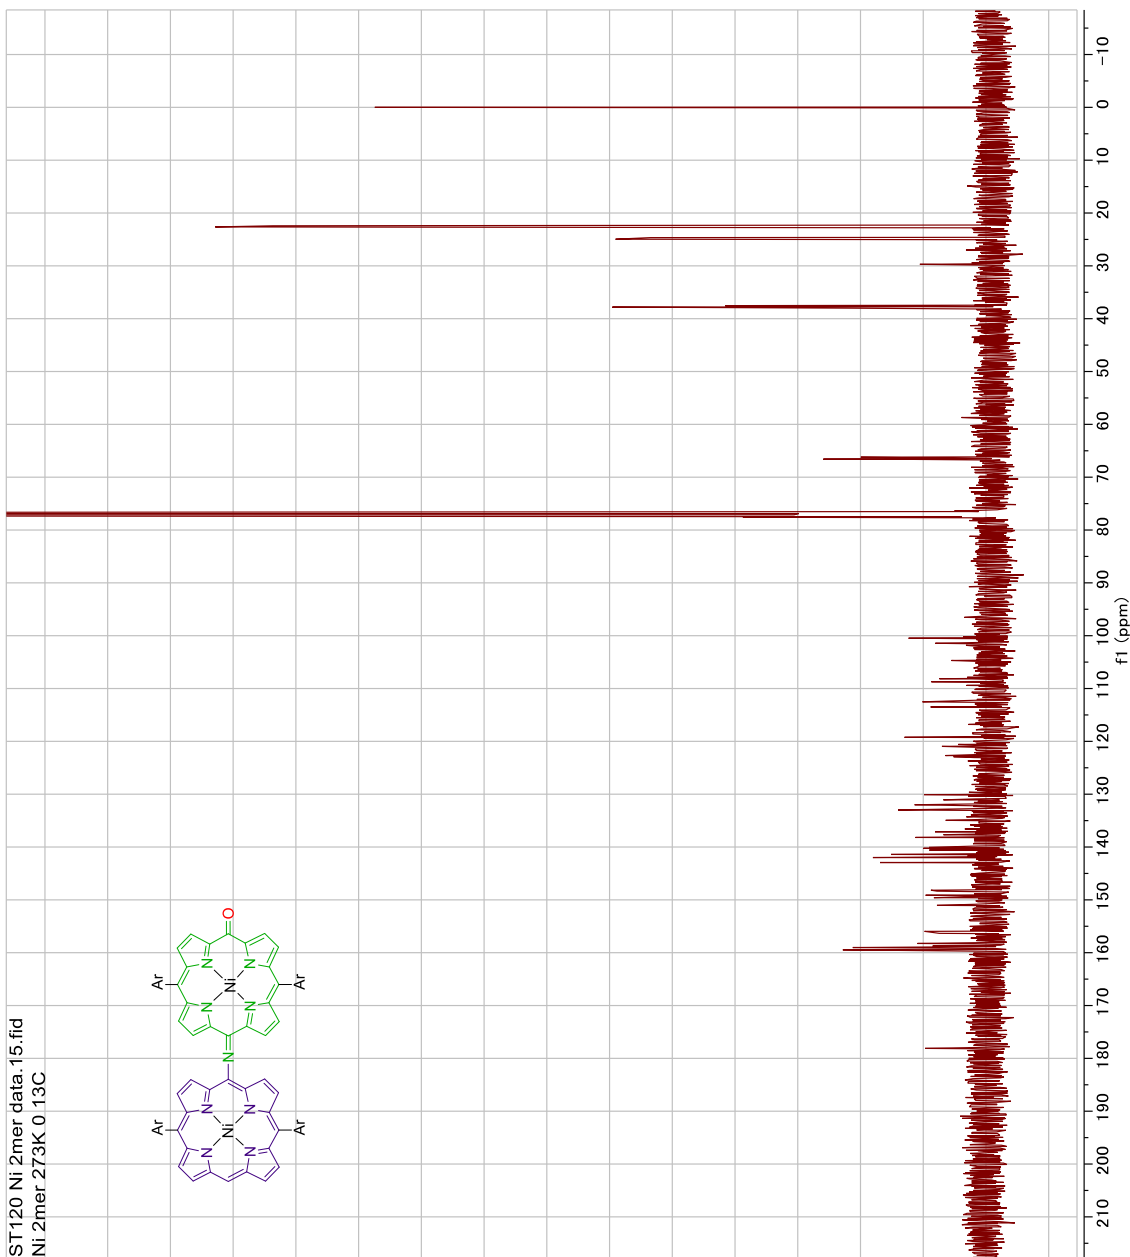

HSQC NMR (CDCl<sub>3</sub>, 273 K)

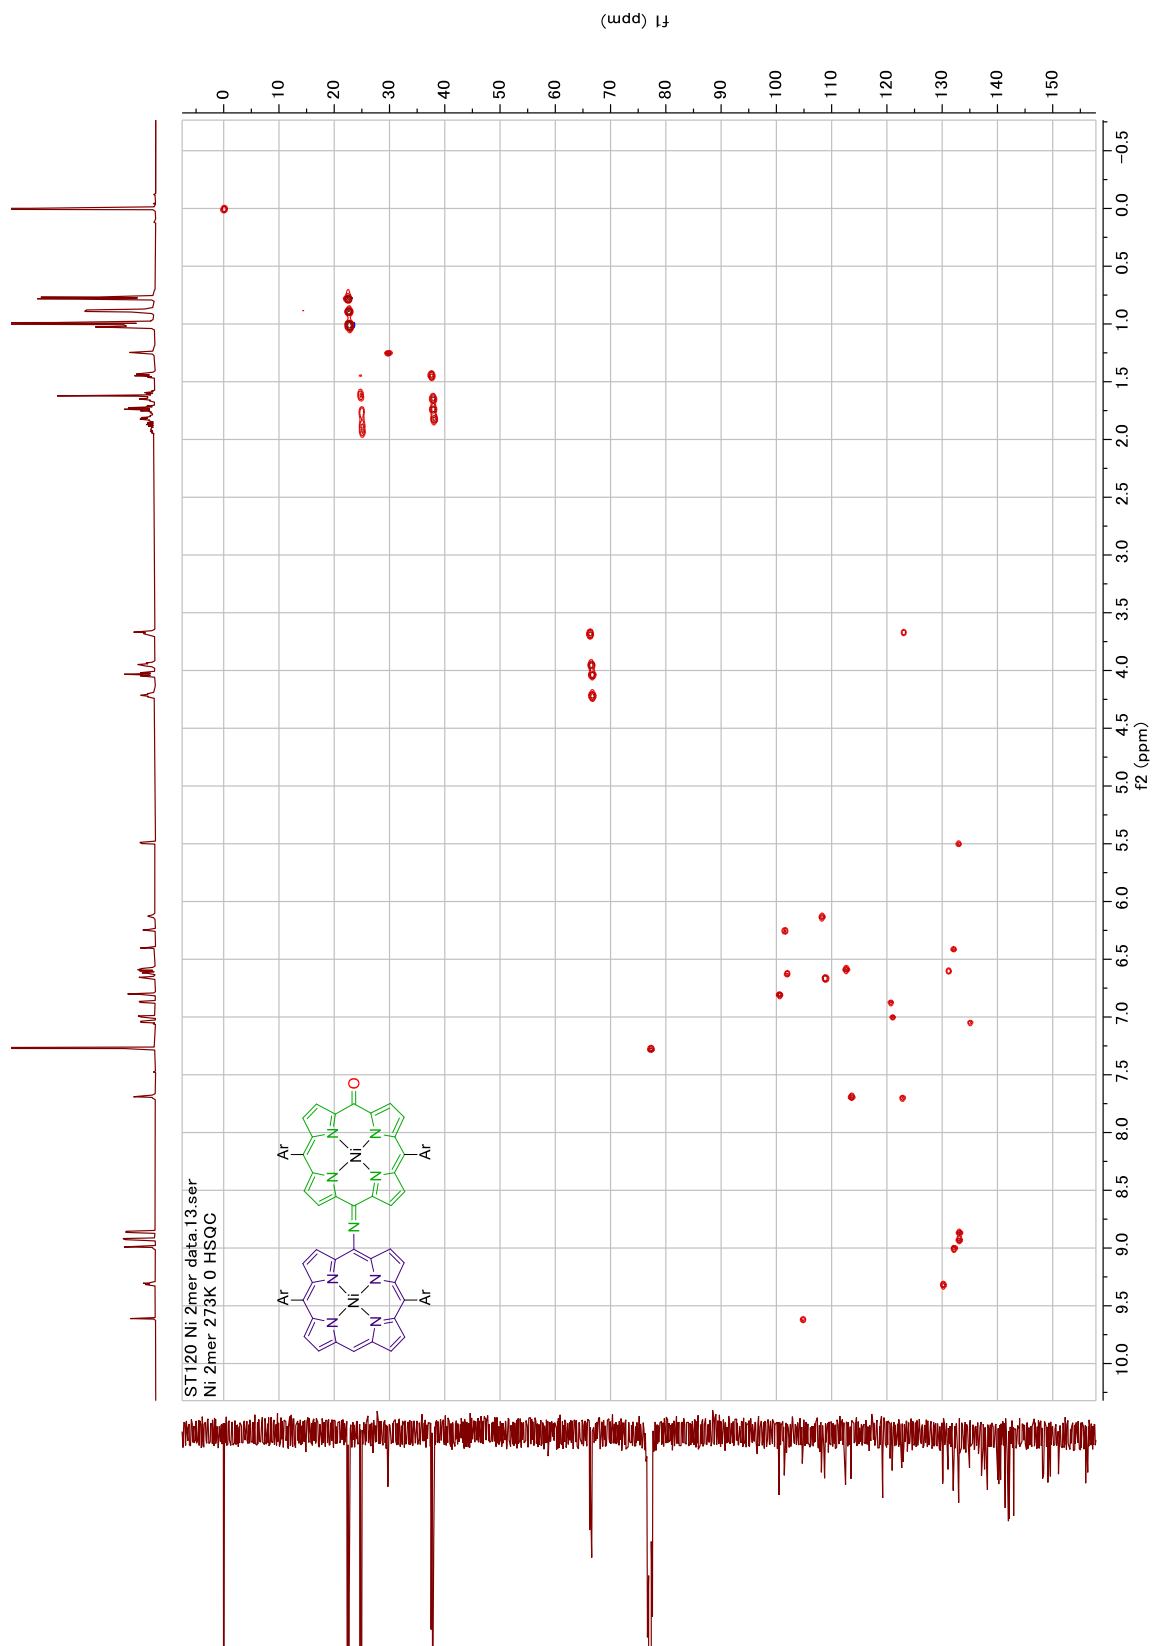



<sup>13</sup>C NMR (125 MHz, CDCl<sub>3</sub>)

| Parameter                  | Value                                                                 |
|----------------------------|-----------------------------------------------------------------------|
| 1 Data File Name           | Y:\TMU-NMR\Bruler\data\takeuchi\nmr\Oligomer_PPOBu_Red2mer data\6.fid |
| 2 Title                    | Red 2mer date. 6.fid                                                  |
| 3 Comment                  | Reductated state 2mer 13C butoxy                                      |
| 4 Origin                   | Bruker BioSpin GmbH                                                   |
| 5 Owner                    | nmr                                                                   |
| 6 Site                     | spect                                                                 |
| 7 Instrument               | spect                                                                 |
| 8 Author                   | CDCI3                                                                 |
| 9 Solvent                  | 298.2                                                                 |
| 10 Temperature             | zgg30                                                                 |
| 11 Pulse Sequence          | 1D                                                                    |
| 12 Experiment              | 5 mm PABBO                                                            |
| 13 Probe                   | BB-H/D Z-GRD Z11365Z/0033                                             |
| 14 Number of Scans         | 6222                                                                  |
| 15 Receiver Gain           | 203.0                                                                 |
| 16 Relaxation Delay        | 2.0000                                                                |
| 17 Pulse Width             | 9.0000                                                                |
| 18 Presaturation Frequency | 1.1011                                                                |
| 19 Acquisition Time        | 2010-12-14T08:34:00                                                   |
| 20 Acquisition Date        | 2010-12-14T08:34:00                                                   |
| 21 Modification Date       | 2010-12-14T08:49:02                                                   |
| 22 Class                   | 125.77                                                                |
| 23 Spectrometer Frequency  | 29761.9                                                               |
| 24 Spectral Width          | -2307.0                                                               |
| 25 Lowest Frequency        | 13C                                                                   |
| 26 Nucleus                 | 32768                                                                 |
| 27 Acquired Size           | 65536                                                                 |
| 28 Spectral Size           | 0.45                                                                  |
| 29 Digital Resolution      |                                                                       |

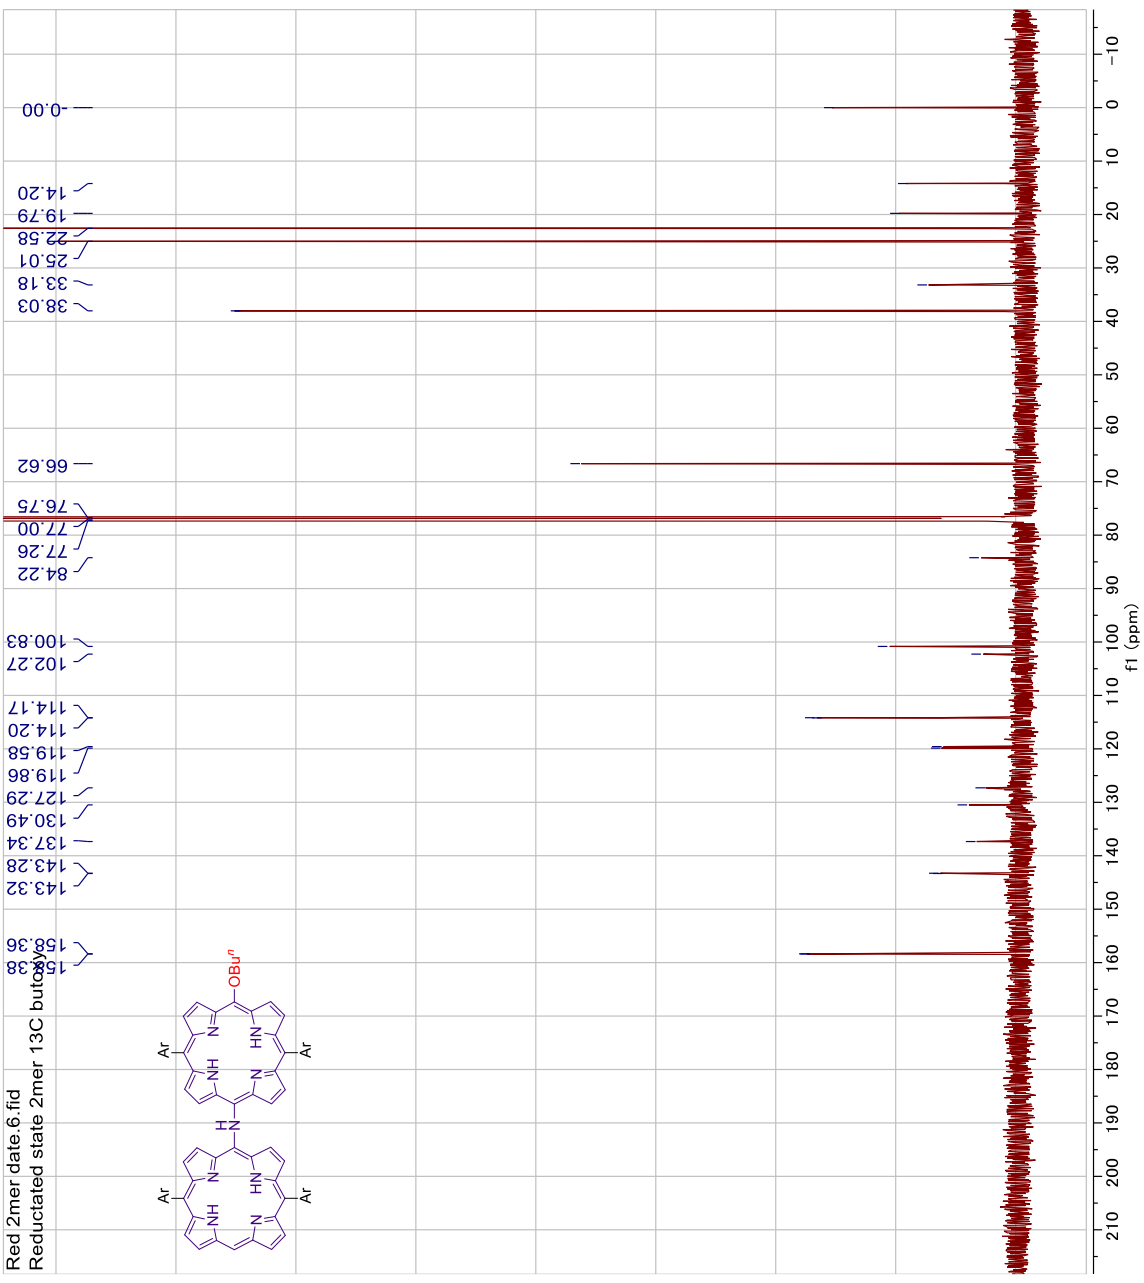

# HSQC NMR (CDCl<sub>3</sub>)

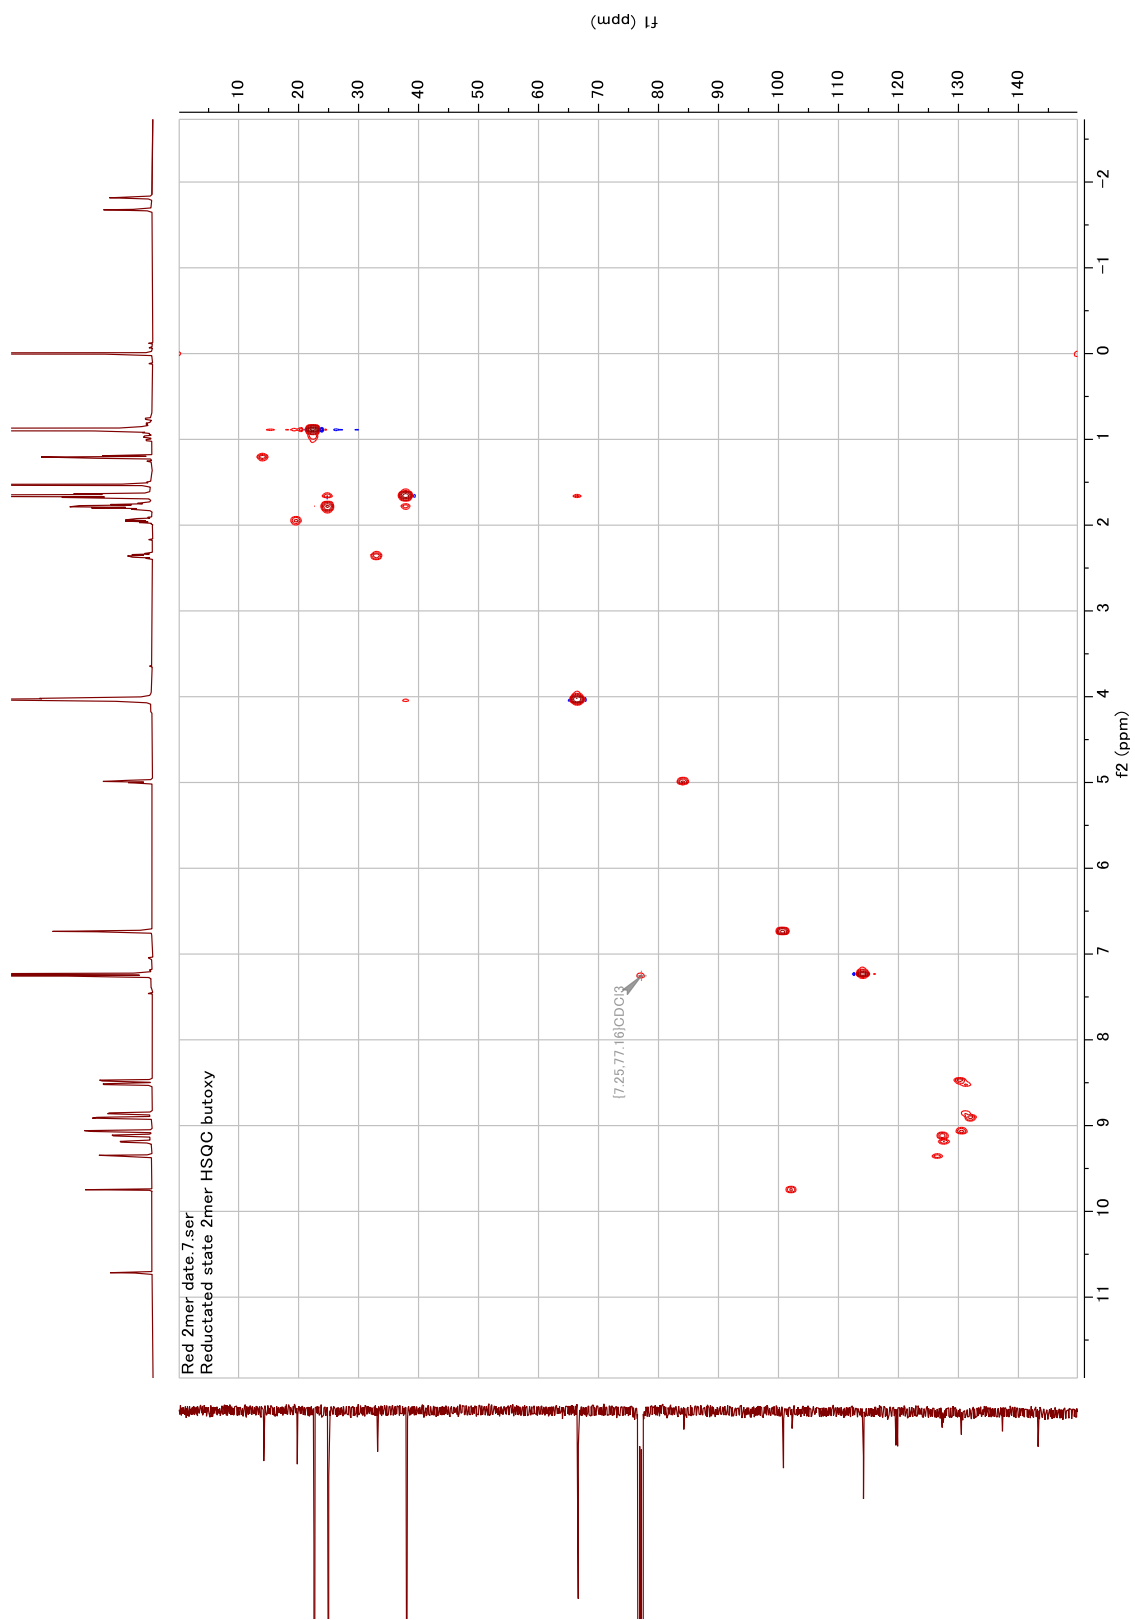

| Parameter                  | Value                                                                           |
|----------------------------|---------------------------------------------------------------------------------|
| 1 Data File Name           | Y:\TMU-NMR\Bruler\data\takeuchi\ nmr\ST219 4mer Na ascor.PPPQ_1Hsa mple/ 1/ fid |
| 2 Title                    | ST219 4mer Na ascor.1.fid                                                       |
| 3 Comment                  | crude PPPQ                                                                      |
| 4 Origin                   | Bruker BioSpin GmbH                                                             |
| 5 Owner                    | nmr                                                                             |
| 6 Site                     | spect                                                                           |
| 7 Instrument               | spect                                                                           |
| 8 Author                   | CDC/3                                                                           |
| 9 Solvent                  | CDCl3                                                                           |
| 10 Temperature             | 298.1                                                                           |
| 11 Pulse Sequence          | zg30                                                                            |
| 12 Experiment ID           | 1D                                                                              |
| 13 Probe                   | 5 mm PABBO BB-1H/ D Z-GRD Z113652/0033                                          |
| 14 Number of Scans         | 16                                                                              |
| 15 Receiver Gain           | 80.6                                                                            |
| 16 Relaxation Delay        | 1.0000                                                                          |
| 17 Pulse Width             | 12.1000                                                                         |
| 18 Presaturation Frequency |                                                                                 |
| 19 Acquisition Time        | 3.1719                                                                          |
| 20 Acquisition Date        | 2011-10-22T13:30:00                                                             |
| 21 Modification Date       | 2011-10-22T13:31:05                                                             |
| 22 Class                   |                                                                                 |
| 23 Spectrometer Frequency  | 500.13                                                                          |
| 24 Spectral Width          | 10330.6                                                                         |
| 25 Lowest Frequency        | -2095.6                                                                         |
| 26 Nucleus                 | <sup>1</sup> H                                                                  |
| 27 Acquired Size           | 32768                                                                           |
| 28 Spectral Size           | 65536                                                                           |
| 29 Digital Resolution      | 0.16                                                                            |

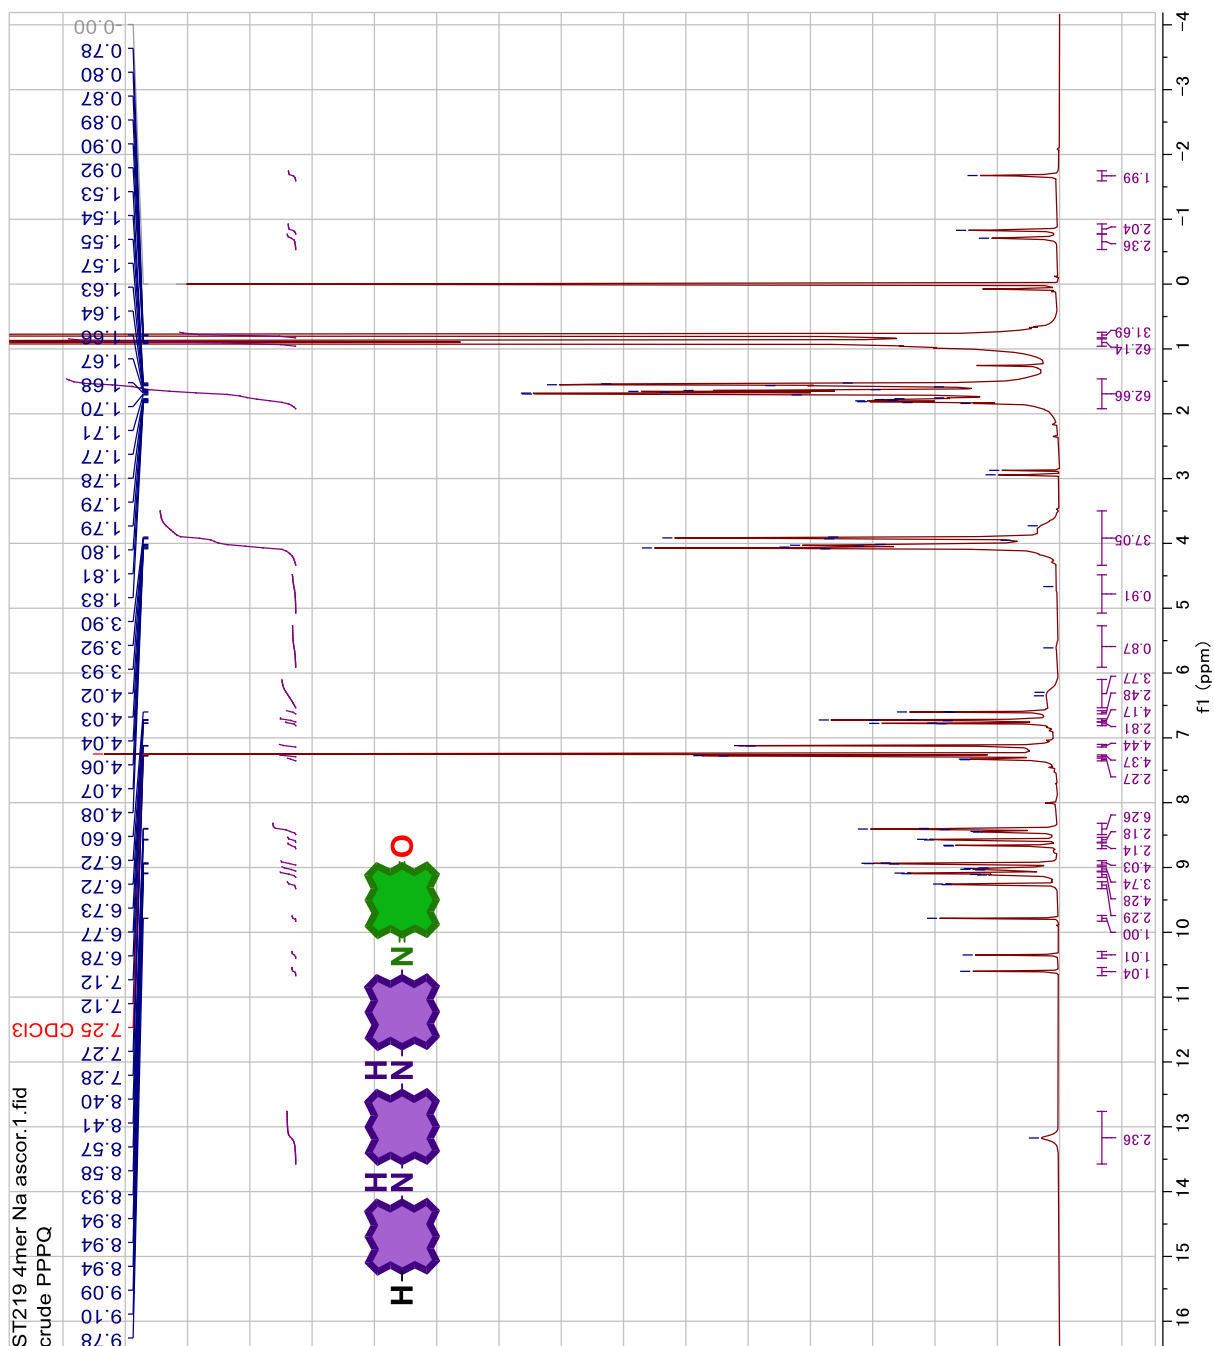

5b

| Parameter                  | Value                                                                |
|----------------------------|----------------------------------------------------------------------|
| 1 Data File Name           | Y:/TMU-NMR/Bruler_/data/takeuchi/nmr/ST238 4mer reduce acetyl_3/ fid |
| 2 Title                    | ST238 4mer reduce acetyl.3.fid                                       |
| 3 Comment                  | fra2 PPPP                                                            |
| 4 Origin                   | Bruker BioSpin GmbH                                                  |
| 5 Owner                    | nmr                                                                  |
| 6 Site                     | spect                                                                |
| 7 Instrument               | spect                                                                |
| 8 Author                   | CDCl3                                                                |
| 9 Solvent                  | 298.2                                                                |
| 10 Temperature             | zg30                                                                 |
| 11 Pulse Sequence          | 1D                                                                   |
| 12 Experiment              | 5 mm PABBO BB-1H/ D Z-GRD Z113652/ 0033                              |
| 13 Probe                   | 16                                                                   |
| 14 Number of Scans         | 203.0                                                                |
| 15 Receiver Gain           | 1.0000                                                               |
| 16 Relaxation Delay        | 12.1000                                                              |
| 17 Pulse Width             | 3.1719                                                               |
| 18 Presaturation Frequency | 2012-01-12T09:41:00                                                  |
| 19 Acquisition Time        | 2012-01-12T09:42:13                                                  |
| 20 Acquisition Date        |                                                                      |
| 21 Modification Date       |                                                                      |
| 22 Class                   |                                                                      |
| 23 Spectrometer            | 500.13                                                               |
| 24 Frequency               | 10330.6                                                              |
| 25 Spectral Width          | -2092.6                                                              |
| 26 Lowest Frequency        | 1H                                                                   |
| 27 Nucleus                 | Acquired Size 32768                                                  |
| 28 Acquired Size           | Spectral Size 65536                                                  |
| 29 Spectral Size           | Digital Resolution 0.16                                              |

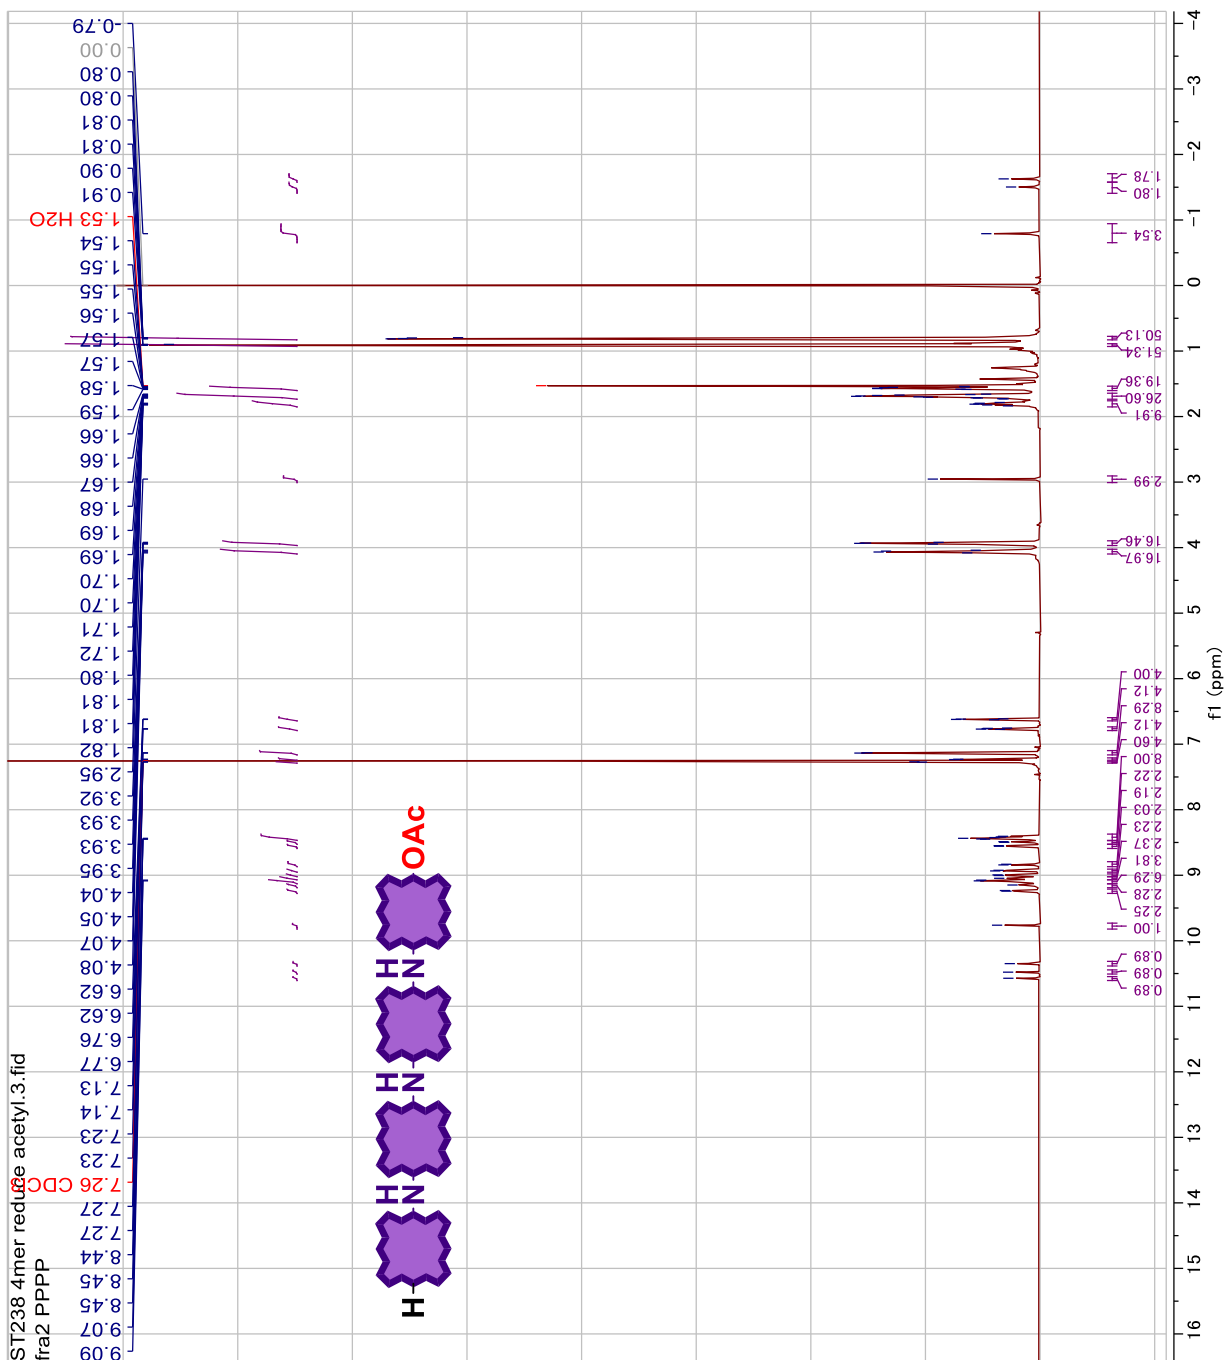



7a + 7b

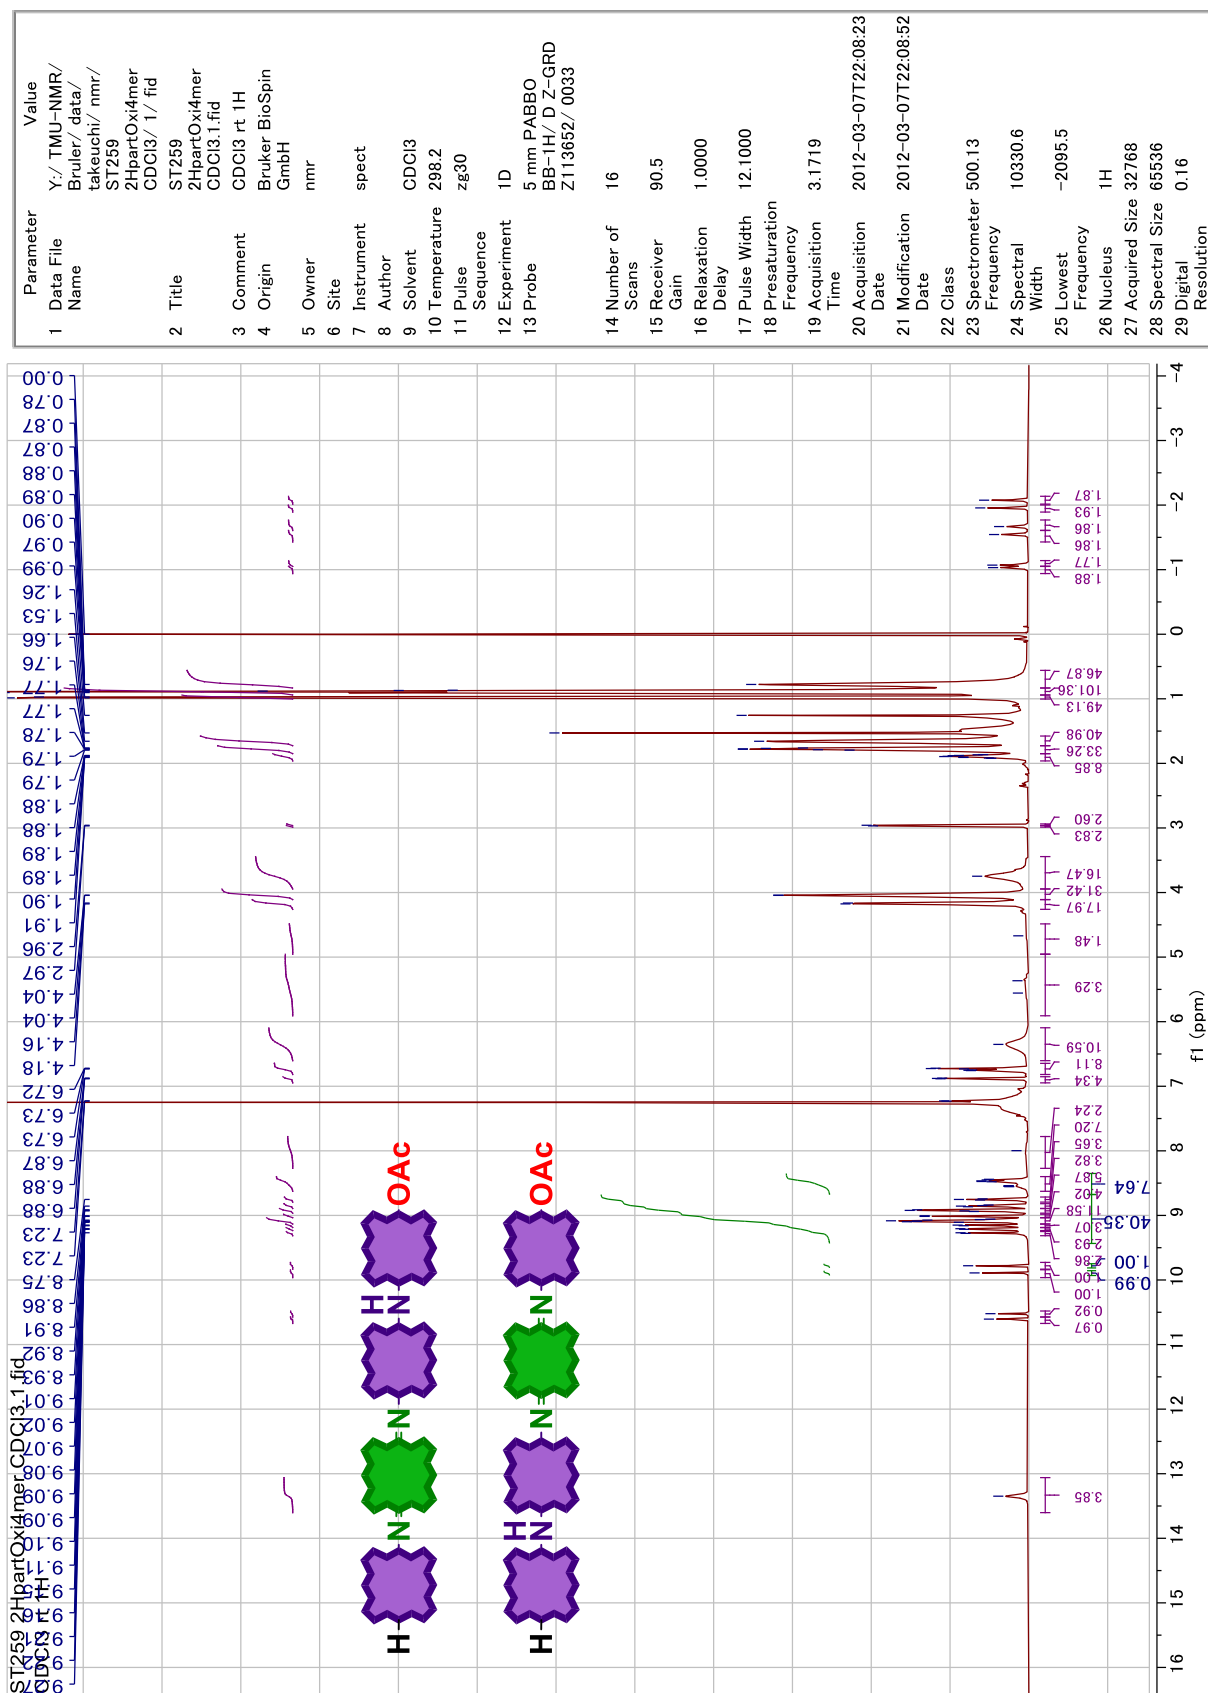

Supplement: d2sc06387e1.pdf [file d2sc06387e1.pdf]
